# Supplementary material for: Complete mitochondrial genomes of Thai and Lao populations indicate an ancient origin of Austroasiatic groups and demic diffusion in the spread of Tai–Kadai languages
Source: PubMed Central journal article supplement (PMC5214972; doi:10.1007/s00439-016-1742-y), 2016-11-11
Supplement: 439_2016_1742_MOESM1_ESM.pdf [file 439_2016_1742_MOESM1_ESM.pdf]

**Online Resource 1** includes Table S1-S5 with respective legends. Table S1: Population information and genetic diversity indices. Table S2: Characteristics of the comparative populations. Table S3: Haplogroup frequencies in the studied populations. Table S4: Shared haplotypes in each pairwise comparison among the 51 Thai/Lao populations. Table S5: The results of the power analysis for the three tested datasets.

**Table S1** Population information and genetic diversity indices.

| Population  | Code | Country   |          | Linguistic family <sup>a</sup> | Linguistic branch <sup>a</sup> | Sample size | Haplotype information |                            |          |      |       |       |           |         | Haplogroup information |                      |      |
|-------------|------|-----------|----------|--------------------------------|--------------------------------|-------------|-----------------------|----------------------------|----------|------|-------|-------|-----------|---------|------------------------|----------------------|------|
|             |      |           |          |                                |                                |             | Number of haplotype   | Number of polymorphic site | <i>h</i> | SD   | MPD   | SD    | <i>Pi</i> | SD      | No. haplogroup         | Haplogroup diversity | SD   |
| Khon Mueang | KM1  | North     | Thailand | Tai-Kadai                      | Southwestern Tai               | 25          | 21                    | 202                        | 0.98     | 0.02 | 36.61 | 16.48 | 0.0022    | 0.00111 | 19                     | 0.97                 | 0.02 |
| Khon Mueang | KM2  | North     | Thailand | Tai-Kadai                      | Southwestern Tai               | 25          | 20                    | 224                        | 0.98     | 0.02 | 34.02 | 15.34 | 0.0021    | 0.00104 | 19                     | 0.98                 | 0.02 |
| Khon Mueang | KM3  | North     | Thailand | Tai-Kadai                      | Southwestern Tai               | 24          | 21                    | 251                        | 0.99     | 0.02 | 40.31 | 18.14 | 0.0024    | 0.00123 | 20                     | 0.98                 | 0.02 |
| Khon Mueang | KM4  | North     | Thailand | Tai-Kadai                      | Southwestern Tai               | 25          | 22                    | 234                        | 0.99     | 0.02 | 37.62 | 16.93 | 0.0023    | 0.00114 | 17                     | 0.96                 | 0.02 |
| Khon Mueang | KM5  | North     | Thailand | Tai-Kadai                      | Southwestern Tai               | 23          | 21                    | 248                        | 0.99     | 0.02 | 37.86 | 17.09 | 0.0023    | 0.00115 | 21                     | 0.99                 | 0.02 |
| Khon Mueang | KM6  | North     | Thailand | Tai-Kadai                      | Southwestern Tai               | 25          | 18                    | 213                        | 0.96     | 0.02 | 39.32 | 17.68 | 0.0024    | 0.00119 | 14                     | 0.94                 | 0.03 |
| Khon Mueang | KM7  | North     | Thailand | Tai-Kadai                      | Southwestern Tai               | 25          | 17                    | 210                        | 0.96     | 0.02 | 35    | 15.77 | 0.0021    | 0.00106 | 16                     | 0.96                 | 0.02 |
| Khon Mueang | KM8  | North     | Thailand | Tai-Kadai                      | Southwestern Tai               | 25          | 18                    | 187                        | 0.95     | 0.03 | 38.96 | 17.52 | 0.0024    | 0.00118 | 15                     | 0.94                 | 0.03 |
| Khon Mueang | KM9  | North     | Thailand | Tai-Kadai                      | Southwestern Tai               | 24          | 18                    | 226                        | 0.97     | 0.02 | 37.54 | 16.92 | 0.0023    | 0.00114 | 17                     | 0.97                 | 0.02 |
| Khon Mueang | KM10 | North     | Thailand | Tai-Kadai                      | Southwestern Tai               | 25          | 15                    | 158                        | 0.95     | 0.02 | 35.83 | 16.14 | 0.0022    | 0.00109 | 11                     | 0.87                 | 0.05 |
| Yuan        | YU1  | North     | Thailand | Tai-Kadai                      | Southwestern Tai               | 17          | 15                    | 174                        | 0.99     | 0.03 | 36.79 | 16.85 | 0.0022    | 0.00114 | 12                     | 0.94                 | 0.04 |
| Yuan        | YU2  | Central   | Thailand | Tai-Kadai                      | Southwestern Tai               | 25          | 19                    | 213                        | 0.98     | 0.02 | 35.84 | 16.14 | 0.0022    | 0.00109 | 19                     | 0.98                 | 0.02 |
| Shan        | SH   | North     | Thailand | Tai-Kadai                      | Southwestern Tai               | 25          | 20                    | 222                        | 0.98     | 0.02 | 39.67 | 17.83 | 0.0024    | 0.0012  | 16                     | 0.96                 | 0.02 |
| Lao Isan    | IS1  | Northeast | Thailand | Tai-Kadai                      | Southwestern Tai               | 25          | 23                    | 250                        | 0.99     | 0.01 | 41.17 | 18.5  | 0.0025    | 0.00125 | 20                     | 0.97                 | 0.02 |
| Lao Isan    | IS2  | Northeast | Thailand | Tai-Kadai                      | Southwestern Tai               | 25          | 22                    | 224                        | 0.99     | 0.01 | 37.91 | 17.06 | 0.0023    | 0.00115 | 18                     | 0.97                 | 0.02 |
| Lao Isan    | IS3  | Northeast | Thailand | Tai-Kadai                      | Southwestern Tai               | 25          | 17                    | 158                        | 0.95     | 0.03 | 35.88 | 16.16 | 0.0022    | 0.00109 | 11                     | 0.86                 | 0.04 |
| Lao Isan    | IS4  | Northeast | Thailand | Tai-Kadai                      | Southwestern Tai               | 25          | 24                    | 244                        | 0.99     | 0.01 | 37.73 | 16.98 | 0.0023    | 0.00115 | 17                     | 0.95                 | 0.03 |
| Lao         | LA1  | North     | Laos     | Tai-Kadai                      | Southwestern Tai               | 25          | 24                    | 232                        | 0.99     | 0.01 | 39.12 | 17.59 | 0.0024    | 0.00119 | 20                     | 0.98                 | 0.02 |
| Lao         | LA2  | Central   | Laos     | Tai-Kadai                      | Southwestern Tai               | 24          | 24                    | 258                        | 1        | 0.01 | 36.55 | 16.48 | 0.0022    | 0.00111 | 21                     | 0.99                 | 0.02 |
| Phutai      | PT   | Northeast | Thailand | Tai-Kadai                      | Southwestern Tai               | 25          | 19                    | 193                        | 0.97     | 0.02 | 36.15 | 16.28 | 0.0022    | 0.0011  | 14                     | 0.94                 | 0.03 |
| Kalueng     | KL   | Northeast | Thailand | Tai-Kadai                      | Southwestern Tai               | 25          | 15                    | 118                        | 0.92     | 0.03 | 26.92 | 12.2  | 0.0016    | 0.00082 | 10                     | 0.9                  | 0.03 |

|           |     |           |                                             |               |                    |    |    |     |      |      |       |       |        |         |    |      |      |
|-----------|-----|-----------|---------------------------------------------|---------------|--------------------|----|----|-----|------|------|-------|-------|--------|---------|----|------|------|
| Seak      | SK  | Northeast | Thailand                                    | Tai-Kadai     | Northwestern Tai   | 26 | 12 | 147 | 0.83 | 0.06 | 24.21 | 10.99 | 0.0015 | 0.00074 | 10 | 0.67 | 0.1  |
| Nyaw      | NY  | Northeast | Thailand                                    | Tai-Kadai     | Southwestern Tai   | 25 | 17 | 175 | 0.96 | 0.02 | 36.15 | 16.28 | 0.0022 | 0.0011  | 14 | 0.95 | 0.02 |
| Black Tai | BT1 | Northeast | Thailand                                    | Tai-Kadai     | Southwestern Tai   | 25 | 10 | 122 | 0.89 | 0.03 | 29.22 | 13.22 | 0.0018 | 0.00089 | 9  | 0.87 | 0.04 |
| Black Tai | BT2 | Central   | Thailand                                    | Tai-Kadai     | Southwestern Tai   | 25 | 22 | 224 | 0.99 | 0.01 | 35.96 | 16.19 | 0.0022 | 0.00109 | 17 | 0.97 | 0.02 |
| Phuan     | PU1 | North     | Thailand                                    | Tai-Kadai     | Southwestern Tai   | 25 | 23 | 234 | 0.99 | 0.01 | 37.76 | 16.99 | 0.0023 | 0.00115 | 18 | 0.96 | 0.02 |
| Phuan     | PU2 | North     | Thailand                                    | Tai-Kadai     | Southwestern Tai   | 25 | 17 | 152 | 0.94 | 0.04 | 33.6  | 15.15 | 0.002  | 0.00102 | 13 | 0.9  | 0.04 |
| Phuan     | PU3 | North     | Thailand                                    | Tai-Kadai     | Southwestern Tai   | 25 | 19 | 202 | 0.97 | 0.02 | 35.71 | 16.09 | 0.0022 | 0.00109 | 16 | 0.95 | 0.03 |
| Phuan     | PU4 | Central   | Thailand                                    | Tai-Kadai     | Southwestern Tai   | 25 | 19 | 187 | 0.97 | 0.02 | 33.35 | 15.04 | 0.002  | 0.00102 | 15 | 0.96 | 0.02 |
| Phuan     | PU5 | Central   | Thailand                                    | Tai-Kadai     | Southwestern Tai   | 25 | 14 | 158 | 0.94 | 0.03 | 34.59 | 15.59 | 0.0021 | 0.00105 | 13 | 0.93 | 0.03 |
| Mon       | MO1 | Northeast | Thailand                                    | Austroasiatic | Monic              | 25 | 13 | 190 | 0.89 | 0.04 | 37.84 | 17.03 | 0.0023 | 0.00115 | 11 | 0.87 | 0.05 |
| Mon       | MO2 | West      | Thailand<br>(Thailand<br>Myanmar<br>border) | Austroasiatic | Monic              | 23 | 18 | 250 | 0.97 | 0.03 | 42.6  | 19.19 | 0.0026 | 0.0013  | 17 | 0.96 | 0.03 |
| Mon       | MO3 | East      | Myanmar<br>(Thailand<br>Myanmar<br>border)  | Austroasiatic | Monic              | 15 | 13 | 180 | 0.98 | 0.03 | 38.9  | 17.93 | 0.0024 | 0.00122 | 12 | 0.96 | 0.04 |
| Mon       | MO4 | Central   | Thailand                                    | Austroasiatic | Monic              | 25 | 18 | 220 | 0.96 | 0.02 | 34.22 | 15.43 | 0.0021 | 0.00104 | 18 | 0.96 | 0.02 |
| Mon       | MO5 | Central   | Thailand                                    | Austroasiatic | Monic              | 22 | 14 | 191 | 0.95 | 0.03 | 30.86 | 14.01 | 0.0019 | 0.00095 | 14 | 0.95 | 0.03 |
| Khmer     | KH1 | Northeast | Thailand                                    | Austroasiatic | Eastern Mon-Khmer  | 19 | 12 | 127 | 0.90 | 0.06 | 32.77 | 14.96 | 0.002  | 0.00101 | 8  | 0.83 | 0.07 |
| Khmer     | KH2 | Northeast | Thailand                                    | Austroasiatic | Eastern Mon-Khmer  | 25 | 16 | 178 | 0.90 | 0.05 | 32.75 | 14.78 | 0.002  | 0.001   | 12 | 0.88 | 0.05 |
| Nyahkur   | BO  | Northeast | Thailand                                    | Austroasiatic | Southern Monic     | 23 | 8  | 114 | 0.85 | 0.04 | 39.62 | 17.87 | 0.0024 | 0.00121 | 5  | 0.79 | 0.04 |
| Suay      | SU  | Northeast | Thailand                                    | Austroasiatic | Eastern Mon-Khmer  | 25 | 16 | 197 | 0.95 | 0.02 | 38.34 | 17.24 | 0.0023 | 0.00116 | 12 | 0.92 | 0.03 |
| Soa       | SO  | Northeast | Thailand                                    | Austroasiatic | Eastern Mon-Khmer  | 25 | 20 | 211 | 0.98 | 0.02 | 34.89 | 15.72 | 0.0021 | 0.00106 | 15 | 0.94 | 0.03 |
| Bru       | BU  | Northeast | Thailand                                    | Austroasiatic | Eastern Mon-Khmer  | 24 | 13 | 136 | 0.93 | 0.03 | 31.52 | 14.26 | 0.0019 | 0.00096 | 10 | 0.88 | 0.04 |
| H'tin     | TN1 | North     | Thailand                                    | Austroasiatic | Southern Mon-Khmer | 25 | 8  | 88  | 0.85 | 0.04 | 21.41 | 9.77  | 0.0013 | 0.00066 | 5  | 0.51 | 0.1  |
| H'tin     | TN2 | North     | Thailand                                    | Austroasiatic | Southern Mon-Khmer | 25 | 7  | 78  | 0.80 | 0.05 | 26.14 | 11.86 | 0.0016 | 0.0008  | 4  | 0.74 | 0.04 |
| H'tin     | TN3 | North     | Thailand                                    | Austroasiatic | Southern Mon-Khmer | 25 | 13 | 146 | 0.88 | 0.05 | 36.07 | 16.25 | 0.0022 | 0.0011  | 9  | 0.8  | 0.06 |
| Khamu     | KA  | North     | Thailand                                    | Austroasiatic | Southern Mon-Khmer | 25 | 15 | 132 | 0.93 | 0.03 | 30.19 | 13.65 | 0.0018 | 0.00092 | 11 | 0.81 | 0.07 |
| Blang     | BL1 | North     | Thailand                                    | Austroasiatic | Southern Mon-Khmer | 25 | 19 | 186 | 0.98 | 0.02 | 34.85 | 15.71 | 0.0021 | 0.00106 | 14 | 0.94 | 0.03 |
| Blang     | BL2 | North     | Thailand                                    | Austroasiatic | Southern Mon-Khmer | 25 | 21 | 162 | 0.98 | 0.02 | 34.43 | 15.52 | 0.0021 | 0.00105 | 10 | 0.89 | 0.04 |

|         |     |       |          |               |                    |    |    |     |      |      |       |       |        |         |    |      |      |
|---------|-----|-------|----------|---------------|--------------------|----|----|-----|------|------|-------|-------|--------|---------|----|------|------|
| Paluang | PL  | North | Thailand | Austroasiatic | Southern Mon-Khmer | 25 | 17 | 213 | 0.97 | 0.02 | 37.31 | 16.79 | 0.0023 | 0.00113 | 15 | 0.95 | 0.02 |
| Lawa    | LW1 | North | Thailand | Austroasiatic | Southern Mon-Khmer | 22 | 11 | 152 | 0.93 | 0.03 | 35.36 | 16.01 | 0.0021 | 0.00108 | 10 | 0.91 | 0.03 |
| Lawa    | LW2 | North | Thailand | Austroasiatic | Southern Mon-Khmer | 24 | 16 | 169 | 0.93 | 0.04 | 38.29 | 17.25 | 0.0023 | 0.00116 | 10 | 0.88 | 0.04 |
| Lawa    | LW3 | North | Thailand | Austroasiatic | Southern Mon-Khmer | 24 | 11 | 142 | 0.87 | 0.05 | 34.58 | 15.61 | 0.0021 | 0.00105 | 8  | 0.84 | 0.04 |

<sup>a</sup>Linguistic classification is based on Ethnologue<sup>1</sup>

#### Reference

1. Lewis, M.P., Simons, G.F., Fennig, C.D. (2016). Ethnologue: Languages of the World, Nineteenth edition (SIL International). Available from <http://www.ethnologue.com>)

**Table S2** Characteristics of the comparative populations.

|    | Population                   | Code | Sample size | Language      | Country/Region                         | Reference                                                 |
|----|------------------------------|------|-------------|---------------|----------------------------------------|-----------------------------------------------------------|
| 1  | Buryat                       | BUR  | 91          | Altai         | Buryat Republic, North Asia            | Derenko et al. (2007, 2010, 2012)                         |
| 2  | Evenki                       | EV   | 17          | Altai         | North Asia                             | Derenko et al. (2007, 2010, 2012); Sukernik et al. (2012) |
| 3  | Altaian-Kizhi Southern Altai | AT_S | 18          | Altai         | Altai Republic, South Siberia, Russia  | Derenko et al. (2007, 2010, 2012)                         |
| 4  | Khamnigan                    | KN   | 32          | Altai         | Buryat Republic, South Siberia, Russia | Derenko et al. (2007, 2010, 2012)                         |
| 5  | Bargat                       | BAR  | 55          | Altai         | Inner Mongolia, China                  | Derenko et al. (2007, 2010, 2012)                         |
| 6  | Khmer                        | KH_C | 18          | Austroasiatic | Cambodia                               | Zhang et al. (2013)                                       |
| 7  | Austroasiatic Cambodian      | AA_C | 65          | Austroasiatic | Cambodia                               | Zhang et al. (2013)                                       |
| 8  | Malpaharia                   | ML   | 15          | Austroasiatic | East India                             | Chandrasekar et al. (2009)                                |
| 9  | Munda                        | MUN  | 31          | Austroasiatic | East India                             | Chandrasekar et al. (2009)                                |
| 10 | Korku                        | KK   | 15          | Austroasiatic | Central India                          | Chandrasekar et al. (2009)                                |
| 11 | Cham                         | CH   | 16          | Austronesian  | Vietnam                                | Peng et al. (2010)                                        |
| 12 | Temuan                       | TM   | 18          | Austronesian  | West Malaysia                          | Jinam et al. (2012)                                       |
| 13 | Seletar                      | SE   | 21          | Austronesian  | West Malaysia                          | Jinam et al. (2012)                                       |
| 14 | Jehai                        | JH   | 24          | Austronesian  | West Malaysia                          | Jinam et al. (2012)                                       |
| 15 | Bidayuh                      | BD   | 23          | Austronesian  | Borneu, Indonesia                      | Jinam et al. (2012)                                       |
| 16 | Besemah                      | BS   | 36          | Austronesian  | Sumatra, Indonesia                     | Gunnarsdóttir et al. (2011b)                              |
| 17 | Semende                      | SMD  | 35          | Austronesian  | Sumatra, Indonesia                     | Gunnarsdóttir et al. (2011b)                              |
| 18 | Mamanwa                      | MM   | 32          | Austronesian  | northern Mindanao, Philippines         | Gunnarsdottir et al. (2011a)                              |
| 19 | Manobo                       | MN   | 40          | Austronesian  | northern Mindanao, Philippines         | Gunnarsdottir et al. (2011a)                              |

|    |                    |     |    |               |                                      |                              |
|----|--------------------|-----|----|---------------|--------------------------------------|------------------------------|
| 20 | Surigaonon         | SR  | 25 | Austronesian  | northern<br>Mindanao,<br>Philippines | Gunnarsdottir et al. (2011a) |
| 21 | Abaknon            | AB  | 30 | Austronesian  | Philippines                          | Delfin et al. (2014)         |
| 22 | Aeta_Bataan        | AEB | 21 | Austronesian  | Philippines                          | Delfin et al. (2014)         |
| 23 | Bagalot            | BAG | 30 | Austronesian  | Philippines                          | Delfin et al. (2014)         |
| 24 | Ibaloi             | IB  | 26 | Austronesian  | Philippines                          | Delfin et al. (2014)         |
| 25 | Ifugao             | IF  | 29 | Austronesian  | Philippines                          | Delfin et al. (2014)         |
| 26 | Ivatan             | IV  | 29 | Austronesian  | Philippines                          | Delfin et al. (2014)         |
| 27 | Kalangoya          | KAG | 26 | Austronesian  | Philippines                          | Delfin et al. (2014)         |
| 28 | Kankanaey          | KAN | 30 | Austronesian  | Philippines                          | Delfin et al. (2014)         |
| 29 | Maranao            | MR  | 18 | Austronesian  | Philippines                          | Delfin et al. (2014)         |
| 30 | Saisiat            | SAI | 24 | Austronesian  | Taiwan                               | Ko et al. (2014)             |
| 31 | Atayal             | ATA | 50 | Austronesian  | Taiwan                               | Ko et al. (2014)             |
| 32 | Tsou               | TSO | 48 | Austronesian  | Taiwan                               | Ko et al. (2014)             |
| 33 | Bunun              | BUN | 51 | Austronesian  | Taiwan                               | Ko et al. (2014)             |
| 34 | Puyuma             | PUY | 39 | Austronesian  | Taiwan                               | Ko et al. (2014)             |
| 35 | Rukai              | RUK | 50 | Austronesian  | Taiwan                               | Ko et al. (2014)             |
| 36 | Paiwan             | PAI | 50 | Austronesian  | Taiwan                               | Ko et al. (2014)             |
| 37 | Ami                | AMI | 50 | Austronesian  | Taiwan                               | Ko et al. (2014)             |
| 38 | Tao                | TAO | 44 | Austronesian  | Taiwan                               | Ko et al. (2014)             |
| 39 | Makatao            | MAK | 50 | Austronesian  | Taiwan                               | Ko et al. (2014)             |
| 40 | Andh               | AD  | 19 | Indo-European | Central India                        | Chandrasekar et al. (2009)   |
| 41 | Dongri Bhill       | DB  | 43 | Indo-European | West India                           | Chandrasekar et al. (2009)   |
| 42 | Kamar              | KMR | 54 | Indo-European | Central India                        | Chandrasekar et al. (2009)   |
| 43 | Kathakur           | KU  | 18 | Indo-European | West India                           | Chandrasekar et al. (2009)   |
| 44 | Kathodi            | KD  | 15 | Indo-European | West India                           | Chandrasekar et al. (2009)   |
| 45 | Katkari            | KR  | 21 | Indo-European | West India                           | Chandrasekar et al. (2009)   |
| 46 | Nihal              | NI  | 28 | Indo-European | Central India                        | Chandrasekar et al. (2009)   |
| 47 | Sonowal<br>Kachari | SOK | 19 | Indo-European | Northeast India                      | Chandrasekar et al. (2009)   |
| 48 | Barmar1            | BR1 | 20 | Sino-Tibetan  | Myanmar                              | Summerer et al. (2014)       |
| 49 | Barmar2            | BR2 | 73 | Sino-Tibetan  | Myanmar                              | Li et al. (2015)             |

|    |                      |      |    |              |                                            |                            |
|----|----------------------|------|----|--------------|--------------------------------------------|----------------------------|
| 50 | Southern Han Chinese | HN_S | 55 | Sino-Tibetan | Hunan and Fujian Provinces, Southern China | Zheng et al. (2011)        |
| 51 | Northern Han Chinese | HN_N | 89 | Sino-Tibetan | Beijing, Northern China                    | Zheng et al. (2011)        |
| 52 | Tibetan              | TB   | 23 | Sino-Tibetan | Tibet and Southern China                   | Zhao et al. (2009)         |
| 53 | Hakka                | HAK  | 45 | Sino-Tibetan | Taiwan                                     | Ko et al. (2014)           |
| 54 | Minnan               | MIN  | 50 | Sino-Tibetan | Taiwan                                     | Ko et al. (2014)           |
| 55 | Dirang Monpa         | DR   | 30 | Sino-Tibetan | Northeast India                            | Chandrasekar et al. (2009) |
| 56 | Gallong              | GL   | 39 | Sino-Tibetan | Northeast India                            | Chandrasekar et al. (2009) |
| 57 | Lachungpa            | LAH  | 25 | Sino-Tibetan | Northeast India                            | Chandrasekar et al. (2009) |
| 58 | Lepcha               | LP   | 20 | Sino-Tibetan | Northeast India                            | Chandrasekar et al. (2009) |
| 59 | Shertukpen           | ST   | 15 | Sino-Tibetan | Northeast India                            | Chandrasekar et al. (2009) |
| 60 | Toto                 | TO   | 28 | Sino-Tibetan | Northeast India                            | Chandrasekar et al. (2009) |
| 61 | Wanchoo              | WA   | 22 | Sino-Tibetan | Northeast India                            | Chandrasekar et al. (2009) |
| 62 | Dai                  | DA   | 56 | Tai-Kadai    | Yunnan, Southern China                     | Diroma et al. (2014)       |

## References

- Chandrasekar A, Kumar S, Sreenath J, Sarkar BN, Urade BP, Mallick S, Bandopadhyay SS, Pinuma Barua P, Barik SS, Basu D, Kiran U, Gangopadhyay P, Sahani R, Prasad BVR, Gangopadhyay S, Lakshmi GR, Ravuri RR, Padmaja K, Venugopal PN, Sharma MB, Rao VR (2009) Updating phylogeny of mitochondrial DNA macrohaplogroup M in India: dispersal of modern human in south Asian corridor. *PLoS One* 4:e7447
- Delfin FS, Min-Shan KA, Li M, Gunnarsdóttir ED, Tabbada KA, Salvador JM, Calacal GC, Sagum MS, Datar FA, Padilla SG, De Ungria MC, Stoneking M (2014) Complete mtDNA genomes of Filipino ethnolinguistic groups: A melting pot of recent and ancient lineages in the Asia-Pacific region. *Eur J Hum Genet* 22:228-237

- Derenko M, Malyarchuk B, Grzybowski T, Denisova G, Dambueva I, Perkova M, Dorzhu C, Luzina F, Lee HK, Vanecek T, Villems R, Zakharov I (2007) Phylogeographic analysis of mitochondrial DNA in Northern Asian populations. *Am J Hum Genet* 81:1025-1041
- Derenko M, Malyarchuk B, Grzybowski T, Denisova G, Rogalla U, Perkova M, Dambueva I, Zakharov I (2010) Origin and post-glacial dispersal of mitochondrial DNA haplogroups C and D in Northern Asia. *PLoS One* 5:e15214
- Derenko M, Malyarchuk B, Denisova G, Perkova M, Rogalla U, Grzybowski T, Khusnutdinova E, Dambueva I, Zakharov I (2012) Complete mitochondrial DNA analysis of Eastern Eurasian haplogroups rarely found in populations of Northern Asia and Eastern Europe. *PLoS One* 7:e32179 analysis of Eastern Eurasian haplogroups rarely found in populations of Northern Asia and Eastern Europe. *PLoS One* 7, e32179.
- Diroma MA, Calabrese C, Simone D, Santorsola M, Calabrese, F.M., Gasparre G and Attimonelli M (2014) Extraction and annotation of human mitochondrial genomes from 1000 Genomes Whole Exome Sequencing data. *BMC Genomics* 15:S2
- Gunnarsdóttir ED, Li M, Bauchet M, Finstermeier K, Stoneking M (2011a) High throughput sequencing of complete human mtDNA genomes from the Philippines. *Genome Res* 21:1-11
- Gunnarsdóttir ED, Nandineni MR, Li M, Myles S, Gil D, Pakendorf B, Stoneking M (2011b) Larger mitochondrial DNA than Y-chromosome differences between matrilineal and patrilineal groups from Sumatra. *Nat Commun* 2:228
- Jinam TA, Hong LC, Phipps ME, Stoneking M, Ameen M, Edo J, HUGO Pan-Asian SNP Consortium, Saitou N (2012) Evolutionary history of continental Southeast Asians: “early train” hypothesis based on genetic analysis of mitochondrial and autosomal DNA data. *Mol Biol Evol* 29:3513-3527

- Ko AM, Chen CY, Fu Q, Delfin F, Li M, Chiu HL, Stoneking M, Ko YC (2014) Early Austronesians: Into and out of Taiwan. *Am J Hum Genet* 94:426-436
- Li YC, Wang HW, Tian JY, Liu LN, Yang LQ, Zhu CL, Wu SF, Kong QP, Zhang YP (2015) Ancient inland human dispersals from Myanmar into interior East Asia since the Late Pleistocene. *Sci Reports* 5:9473
- Peng MS, Quang HH, Dang KP, Trieu AV, Wang HW, Yao YG, Kong QP, Zhang YP (2010) Tracing the Austronesian footprint in mainland Southeast Asia: a perspective from mitochondrial DNA. *Mol Biol Evol* 27:2417-2430
- Sukernik RI, Volodko NV, Mazunin IO, Eltsov NP, Dryomov SV, Starikovskaya EB (2012). Mitochondrial genome diversity in the Tubalar, Even, and Ulchi: contribution to prehistory of native Siberians and their affinities to native Americans. *Am. J. Phys. Anthropol.* 148:123-138.
- Summerer M, Horst J, Erhart J, Weißensteiner H, Schönherr S, Pacher D, Forer L, Horst D, Manhart A, Horst B, Sanguansermsri T, Brandstätter AK (2014) Large-scale mitochondrial DNA analysis in Southeast Asia reveals evolutionary effects of cultural isolation in the multi-ethnic population of Myanmar. *BMC Evol* 14:17
- Zhao M, Kong QP, Wang HW, Peng MS, Xie XD, Wang WZ, Jiayang, Duan JG, Cai MC, Zhao, SN, Cidanpingcuo, Tu YQ, Wua SF, Yao YG, Bandelt HJ, Zhang YP (2009) Mitochondrial genome evidence reveals successful late Paleolithic settlement on the Tibetan Plateau. *Proc. Natl. Acad. Sci. USA* 106:21230-21235.
- Zhang X, Qi X, Yang Z, Serey B, Sovannary T, Bunnath L, Aun HS, Samnom H, Zhang H, Lin Q, Oven MV, Shi H, Su B (2013) Analysis of mitochondrial genome diversity identifies new and ancient maternal lineages in Cambodian aborigines. *Nat Commun* 4:2599

Zheng HX, Yan S, Qin ZD, Wang Y, Tan JZ, Li H, Jin L (2011) Major population expansion of East Asians began before Neolithic time: evidence of mtDNA genomes. PLoS One 6:e25835













**Table S5** The results of the power analysis for the three tested datasets.

|                                        | True Positive | False Positive |
|----------------------------------------|---------------|----------------|
| Test1 Northern Thai people             |               |                |
| model1                                 | 0.574         | 0.066          |
| model2                                 | 0.222         | 0.227          |
| model3                                 | 0.734         | 0.0355         |
| Test2 Northeastern Thai and Lao people |               |                |
| model1                                 | 0.61          | 0.0485         |
| model2                                 | 0.235         | 0.211          |
| model3                                 | 0.589         | 0.0625         |
| Test3 Northeastern Thai people         |               |                |
| model1                                 | 0.541         | 0.137          |
| model2                                 | 0.373         | 0.207          |
| model3                                 | 0.86          | 0.014          |
