# Supplementary material for: Complete mitochondrial genomes of Thai and Lao populations indicate an ancient origin of Austroasiatic groups and demic diffusion in the spread of Tai–Kadai languages
Source: PubMed Central journal article supplement (PMC5214972; doi:10.1007/s00439-016-1742-y), 2016-11-11
Supplement: 439_2016_1742_MOESM2_ESM.pdf [file 439_2016_1742_MOESM2_ESM.pdf]

**Online Resource 2** is sequence coverage for the studied mtDNA genomes.

Average coverage is indicated by black solid line while minimum and maximum coverages are represented by gray lines. The sample identification of each population is as follows:

| Sample ID       | Population Code | Sample ID     | Population Code |
|-----------------|-----------------|---------------|-----------------|
| A1YU101-A1YU137 | KM1             | PAA101-PCC144 | PU2             |
| A2YU101-A2YU152 | KM2             | PPA101-PPA144 | PU3             |
| A2YU202-A2YU238 | KM3             | LTP101-LTP147 | PU4             |
| A2YU301-A2YU357 | KM4             | SPP101-SPP135 | PU5             |
| A2YU401-A2YU439 | KM5             | MO101-MO147   | MO1             |
| A2YU501-A2YU548 | KM6             | MON201-MON251 | MO2             |
| A2YU601-A2YU652 | KM7             | MON301-MON329 | MO3             |
| A3YU103-A3YU147 | KM8             | MLB101-MLB141 | MO4             |
| A4YU101-A4YU143 | KM9             | RM101-RM129   | MO5             |
| A4YU201-A4YU227 | KM10            | KHM101-KHM125 | KH1             |
| UT401-UT427     | YU1             | KHM201-KHM239 | KH2             |
| RY101-RY145     | YU2             | BO101-BO147   | BO              |
| YA101-YA139     | SH              | SU101-SU148   | SU              |
| LAO101-LAO148   | IS1             | SO101-SO145   | SO              |
| LAO401-LAO449   | IS2             | BRU101-BRU137 | BU              |
| LAO501-LAO550   | IS3             | TN101-TN153   | TN1             |
| LAO601-LAO632   | IS4             | TN201-TN236   | TN2             |
| LUA101-LUA149   | LA1             | TN301-TN367   | TN3             |
| VIE101-VIE149   | LA2             | KM101-KM142   | KA              |
| PUT101-PUT144   | PT              | PP101-PP181   | BL1             |
| KAL101-KAL149   | KL              | PP203-PP280   | BL2             |
| SAK101-SAK140   | SK              | PL101-PL203   | PL              |
| YOH101-YOH141   | NY              | LW101-LW149   | LW1             |
| BAT101-BAT137   | BT1             | LW501-LW549   | LW2             |
| PT101-PT141     | BT2             | LW601-LW641   | LW3             |
| STP101-STP141   | PU1             |               |                 |

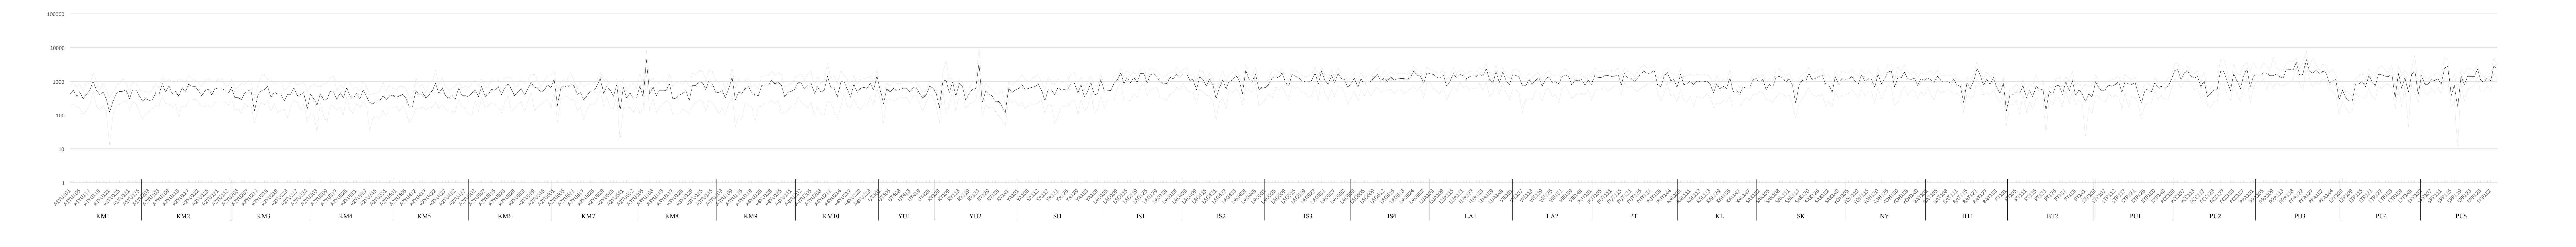

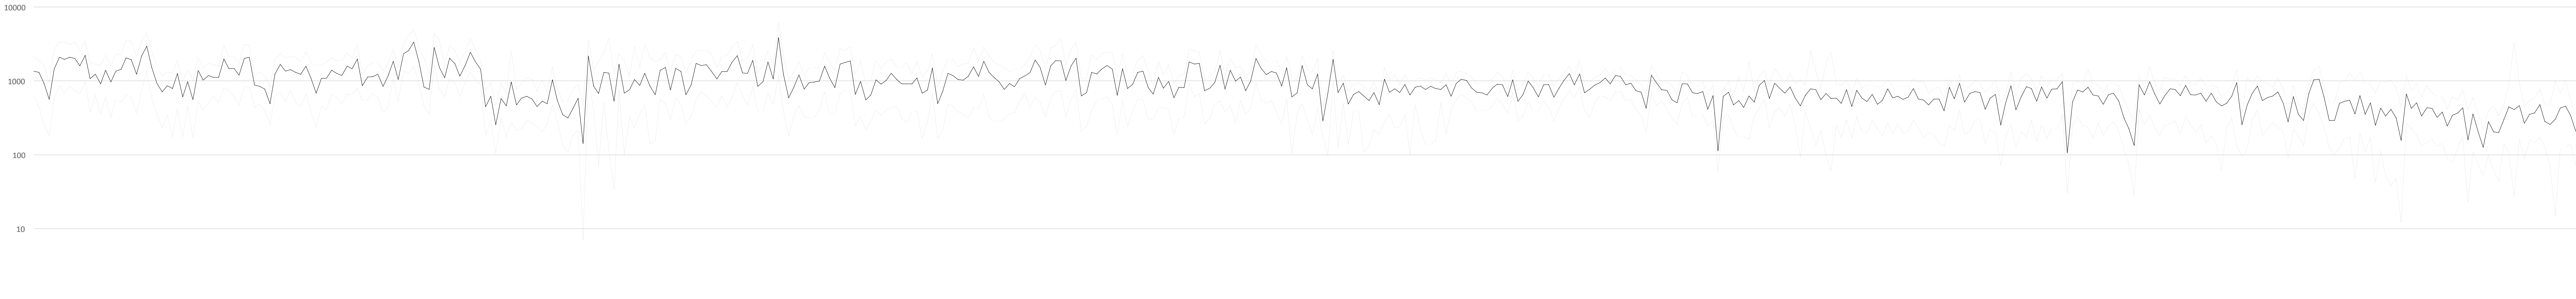

1

MO101 MO103 MO107 MO111 MO115 MO119 MO123 MO127 MO131 MO135 MO139 MO143 MO147  
 MON205 MON209 MON213 MON217 MON223 MON229 MON233 MON237 MON241 MON245 MON249 MON301 MON305 MON309 MON313 MON317 MON321 MON325 MON329  
 MLB103 MLB107 MLB111 MLB115 MLB119 MLB123 MLB127 MLB131 MLB133 MLB135 MLB137 MLB139 MLB143  
 RM103 RM105 RM107 RM109 RM111 RM113 RM115 RM119 RM123 RM127  
 KHM101 KHM103 KHM105 KHM107 KHM114 KHM116 KHM118 KHM121 KHM123 KHM125  
 KHM202 KHM205 KHM207 KHM209 KHM213 KHM216 KHM218 KHM221 KHM225 KHM229 KHM233 KHM237  
 BO101 BO103 BO107 BO111 BO117 BO121 BO125 BO129 BO135 BO139 BO143 BO147  
 SU103 SU107 SU111 SU115 SU119 SU123 SU127 SU131 SU135 SU139 SU143 SU147  
 SO105 SO109 SO113 SO117 SO121 SO125 SO129 SO133 SO137 SO141 SO145 SO149  
 BRU102 BRU104 BRU106 BRU108 BRU110 BRU112 BRU115 BRU119 BRU123 BRU129 BRU133 BRU137  
 TN103 TN105 TN109 TN113 TN115 TN119 TN123 TN125 TN129 TN141 TN147 TN151  
 TN201 TN203 TN206 TN209 TN212 TN216 TN219 TN223 TN226 TN229 TN231 TN233 TN236  
 TN302 TN306 TN308 TN313 TN317 TN322 TN326 TN332 TN337 TN341 TN353 TN361 TN365  
 KM101 KM103 KM107 KM110 KM113 KM117 KM120 KM123 KM127 KM130 KM135 KM139 KM142  
 PP103 PP105 PP114 PP125 PP131 PP137 PP141 PP144 PP154 PP157 PP163 PP173 PP179  
 PP207 PP211 PP215 PP231 PP235 PP239 PP243 PP255 PP259 PP265 PP270  
 PL103 PL107 PL111 PL117 PL121 PL127 PL131 PL134 PL139 PL143 PL147 PL201  
 LW101 LW106 LW108 LW113 LW116 LW119 LW123 LW130 LW135 LW139 LW148 LW501  
 LW505 LW509 LW513 LW519 LW523 LW527 LW531 LW535 LW539 LW543 LW547 LW601  
 LW605 LW609 LW612 LW617 LW619 LW623 LW625 LW628 LW631 LW637 LW639

MO1 MO2 MO3 MO4 MO5 KH1 KH2 BO SU SO BU TN1 TN2 TN3 KA BL1 BL2 PL LW1 LW2 LW3
