# Supplementary material for: Complete mitochondrial genomes of Thai and Lao populations indicate an ancient origin of Austroasiatic groups and demic diffusion in the spread of Tai–Kadai languages
Source: Hum Genet. 2016 Nov 11;136(1):85–98. doi: 10.1007/s00439-016-1742-y (PMC5214972; doi:10.1007/s00439-016-1742-y)
Supplement: Supplementary file 3 — Supplementary material 3 (PDF 7072 kb) [file 439_2016_1742_MOESM3_ESM.pdf]

**Online Resource 3** includes Figures S1-S7 with respective legends. Figure S1: Correspondence analysis (CA) based on haplogroup counts. Figure S2: Neighbor Joining tree based on the  $\Phi_{st}$  genetic distance matrix for the populations in the present study and comparative populations. Figure S3: Bayesian maximum clade credibility (MCC) trees for 17 haplogroups (F1a, F1f, B5a, B4, B6a, R22, R9b, W3a1b, A, N9a, M7b1a, D, CZ, M20, M12-G, M24, and M74). Figure S4: Networks of 14 major haplogroups (F1a, F1f, B5a, B4, M7, D, M8, M12-G, M20, M24, M74, R9b, R22 and N9a) based on Thai/Lao mtDNA genomes and three haplogroups (B4c2, B6a and R22) based on sequences in Thai/Lao populations and other East Asian populations. Figure S5: The contour maps of the frequencies of 14 haplogroups (F1, F1f, B5, B5a1d, B4, B6a, D, M7, M12, M20, M24, M74, R9b and R22) in Thai/Lao populations. Figure S6: Bayesian skyline plots show the effective population size change over time in each studied population. Figure S7: Principal Component Analysis (PCA) plots reveal the fit between the simulated and observed data generated by the best 1,000 (or 5,000) simulations for each model.

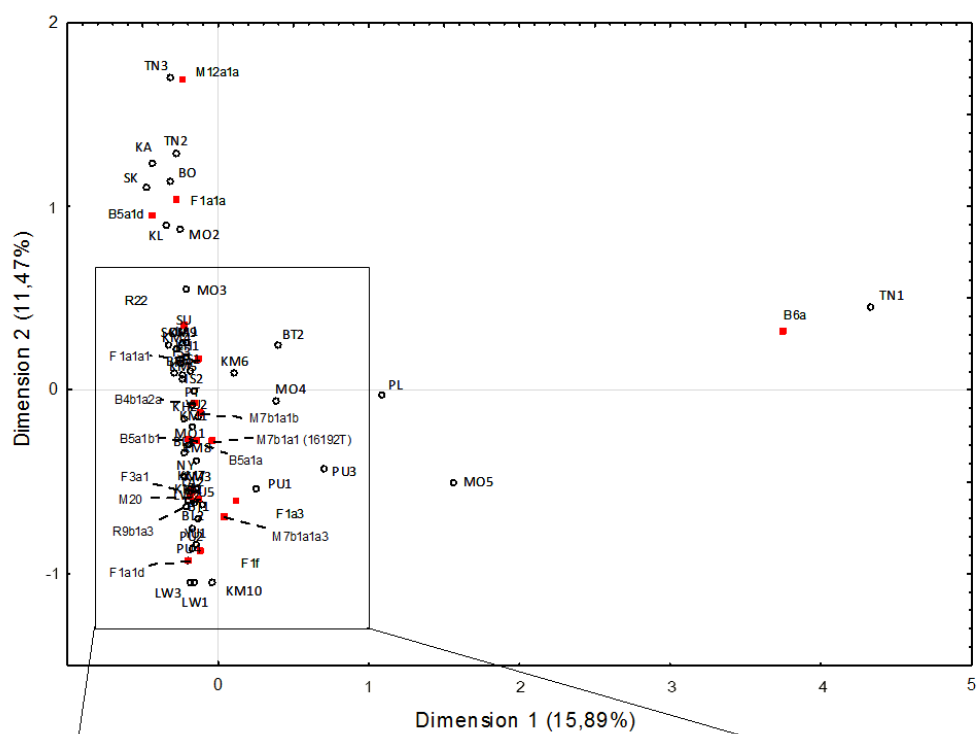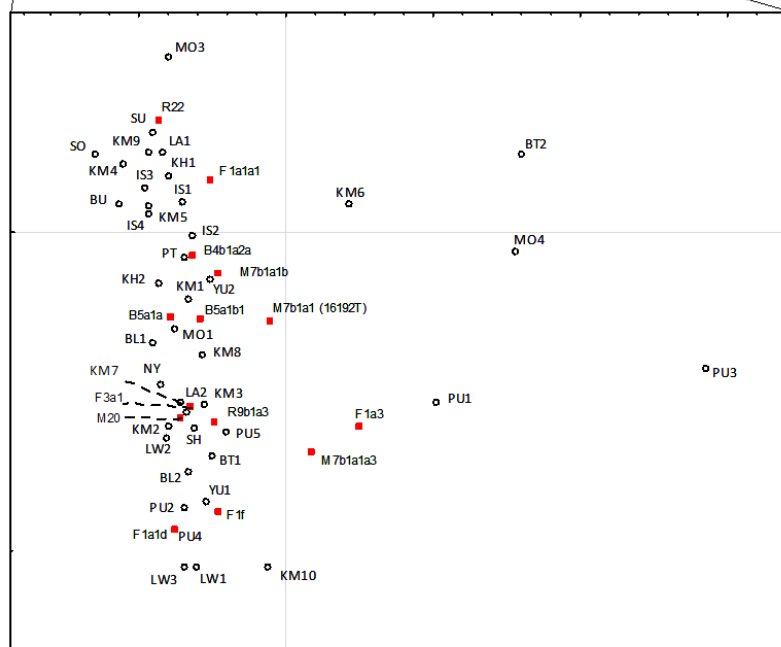

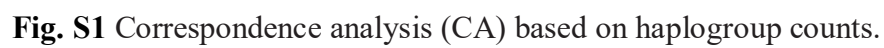

**Fig. S1** Correspondence analysis (CA) based on haplogroup counts.

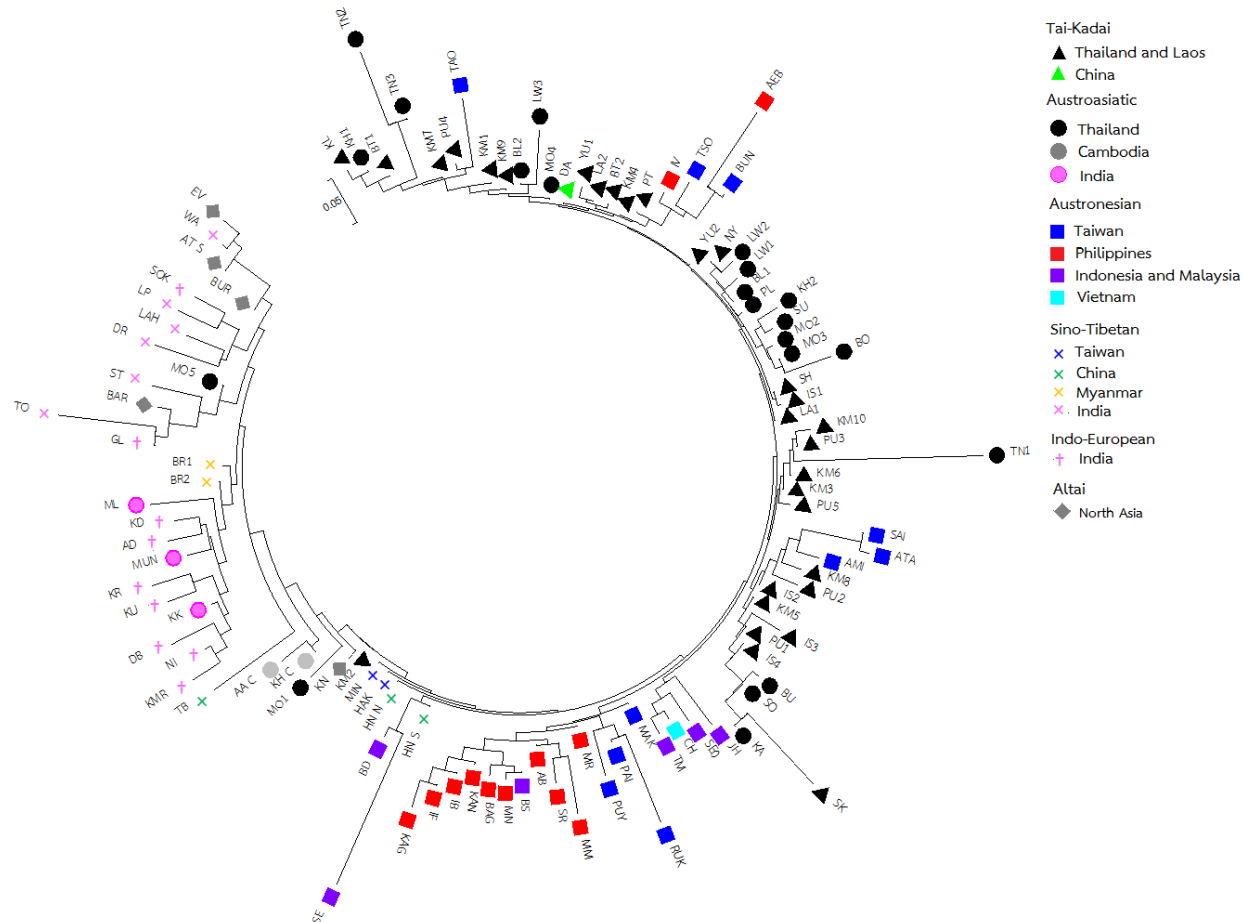

**Fig. S2** Neighbor Joining tree based on the  $\Phi_{st}$  genetic distance matrix for the populations in the present study and comparative populations. Population codes are provided in Fig. 1 and Table S2.

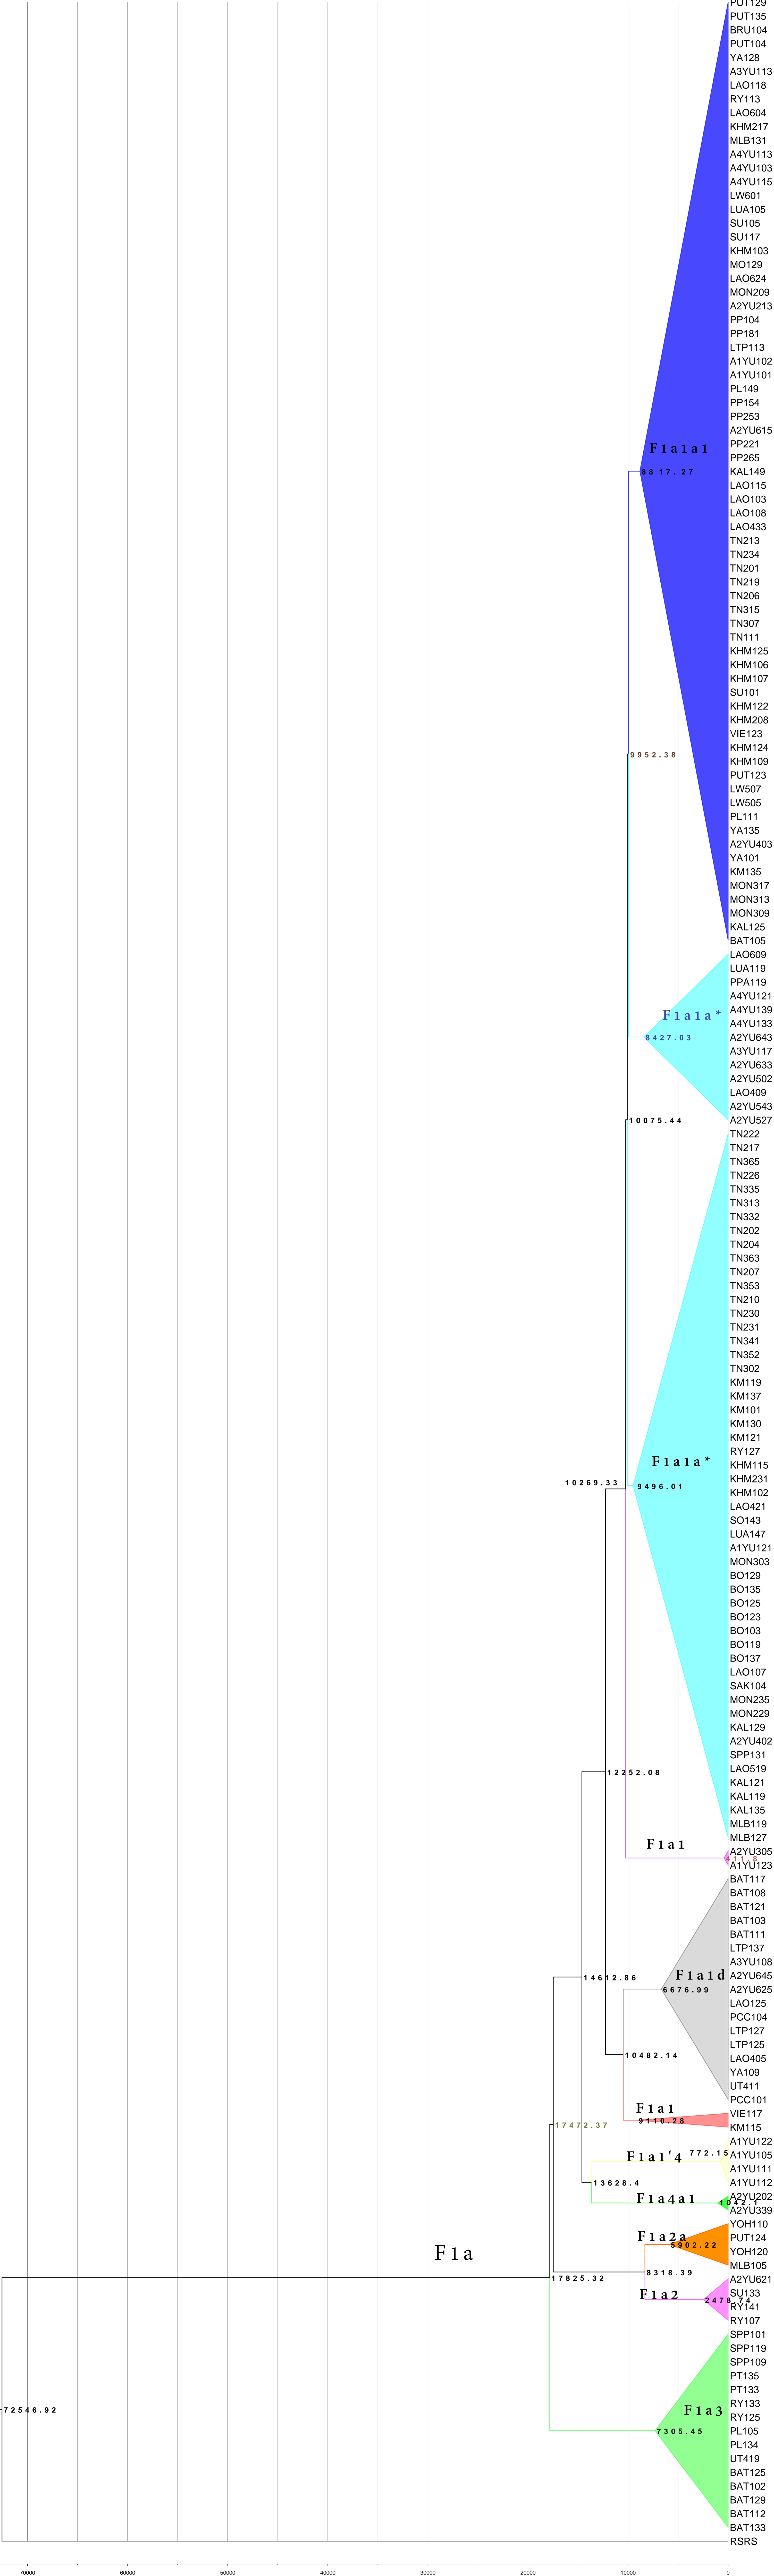

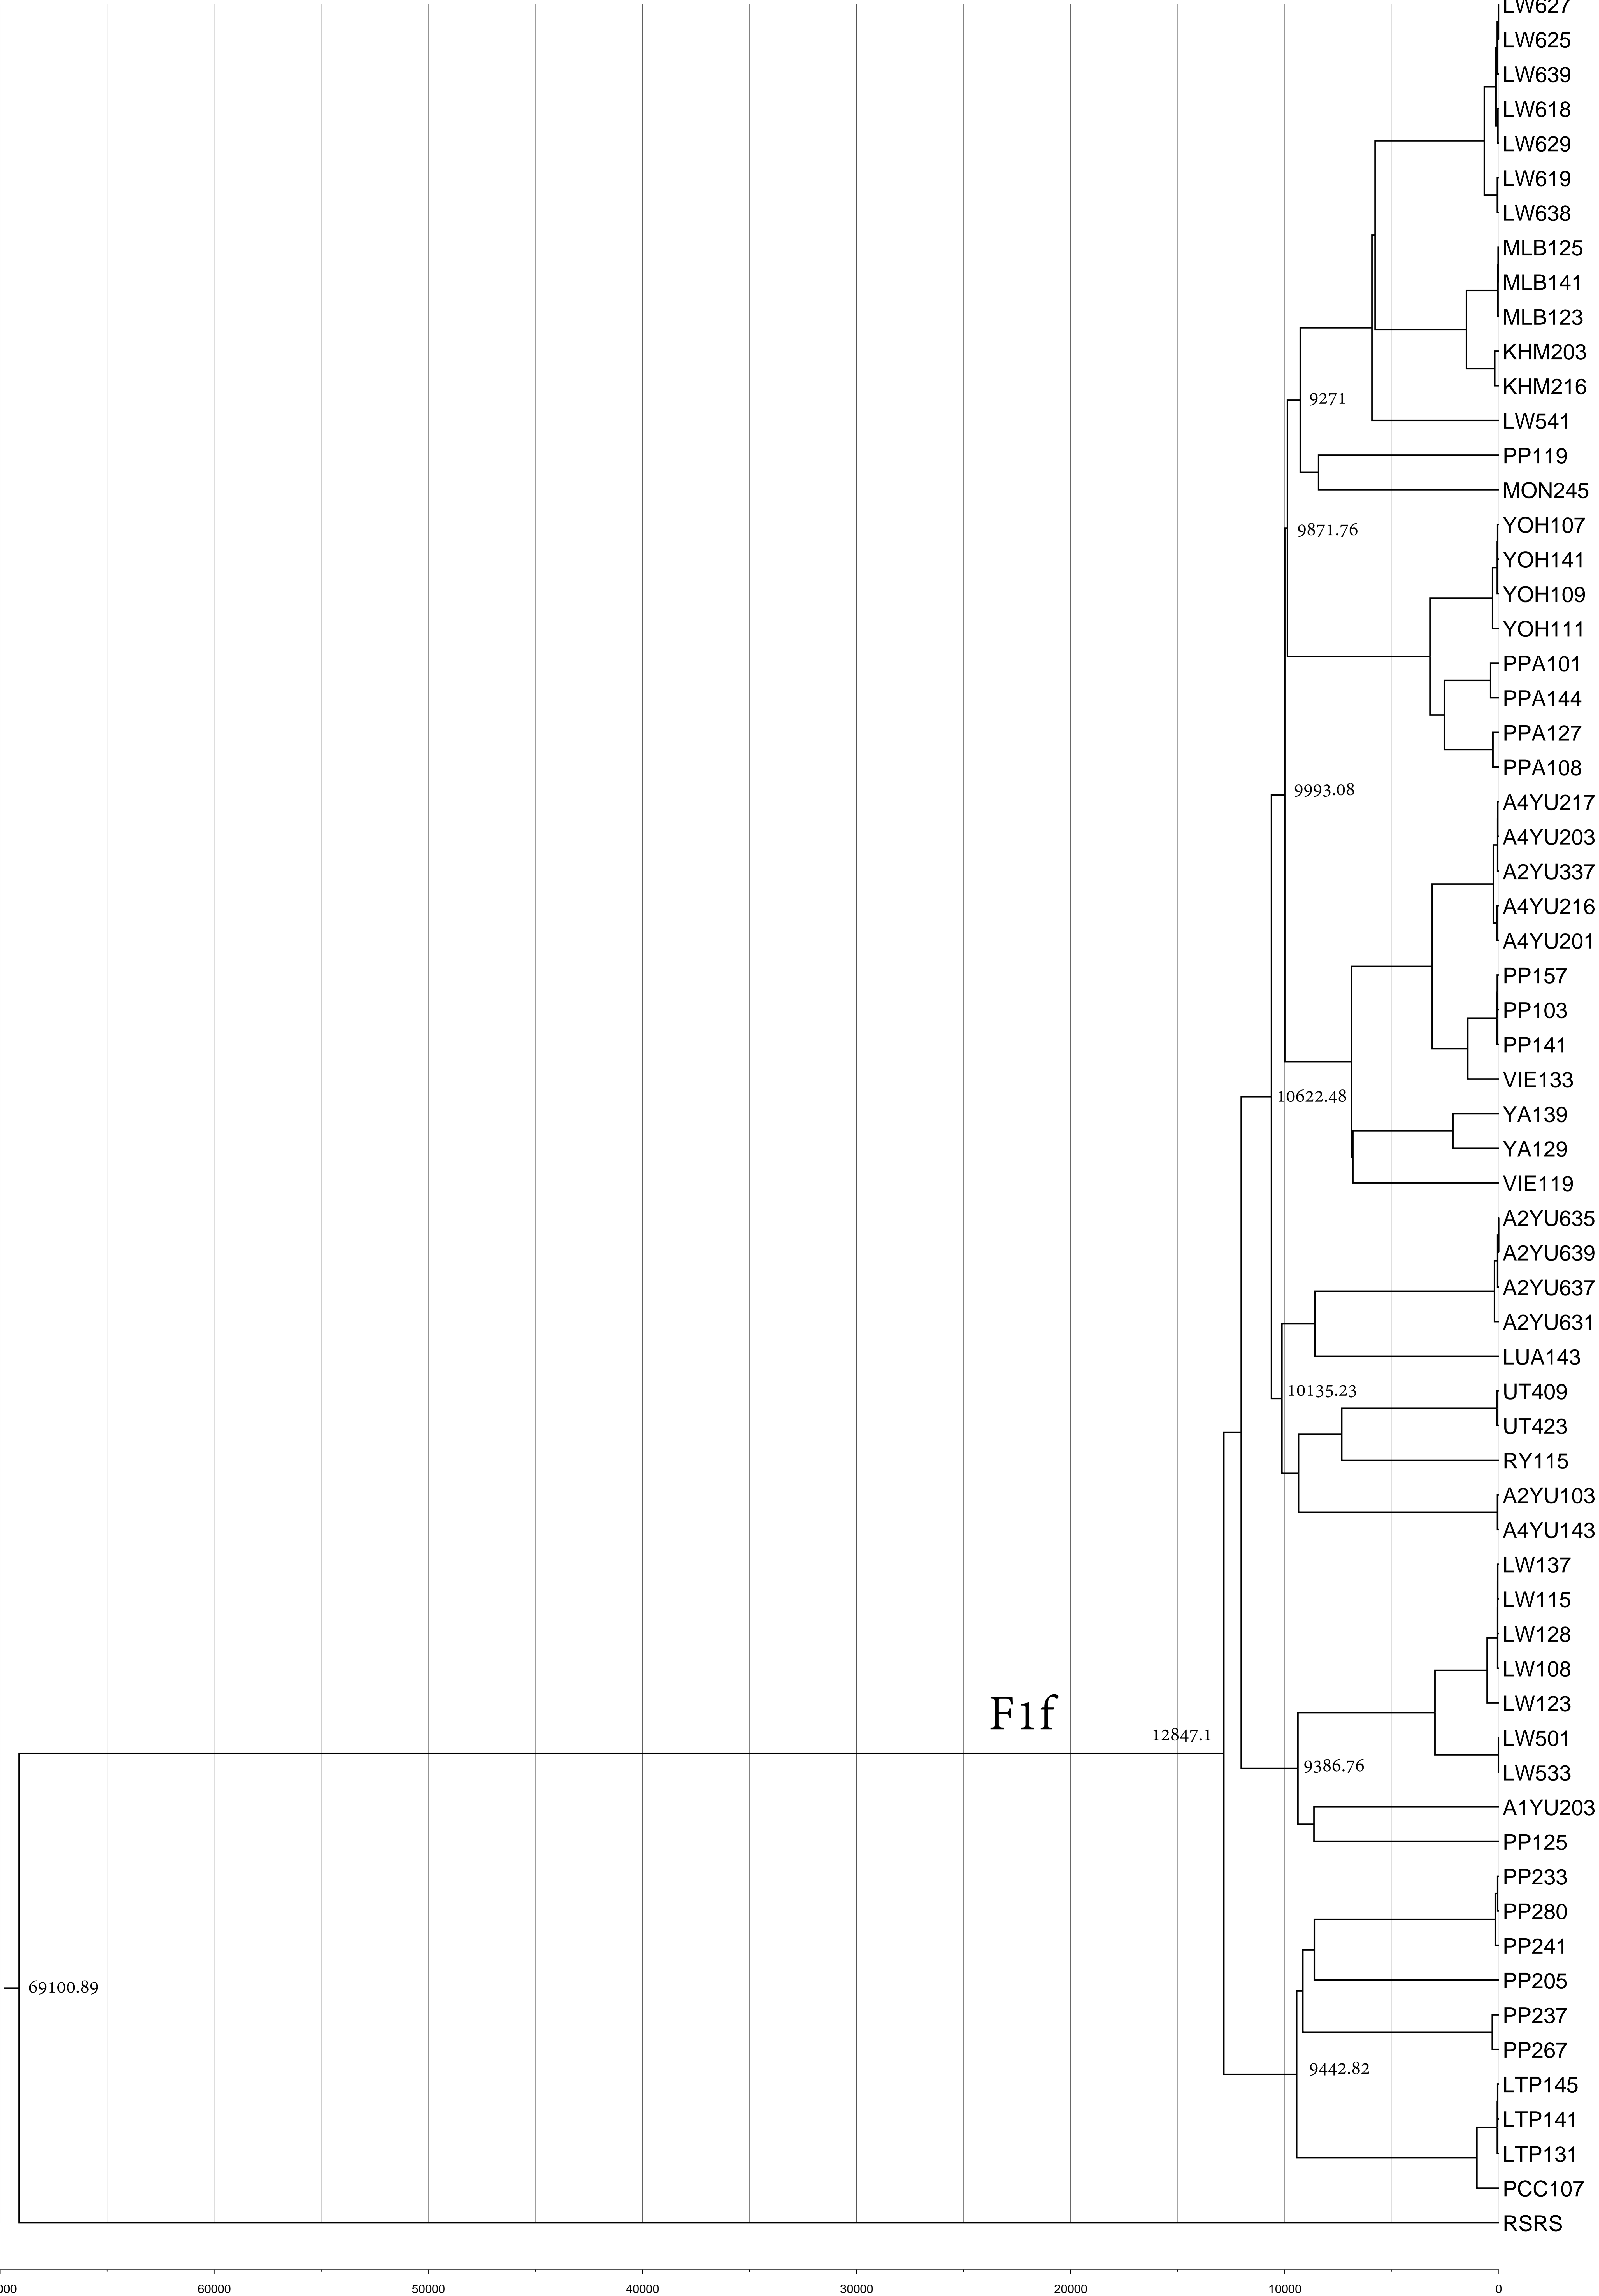

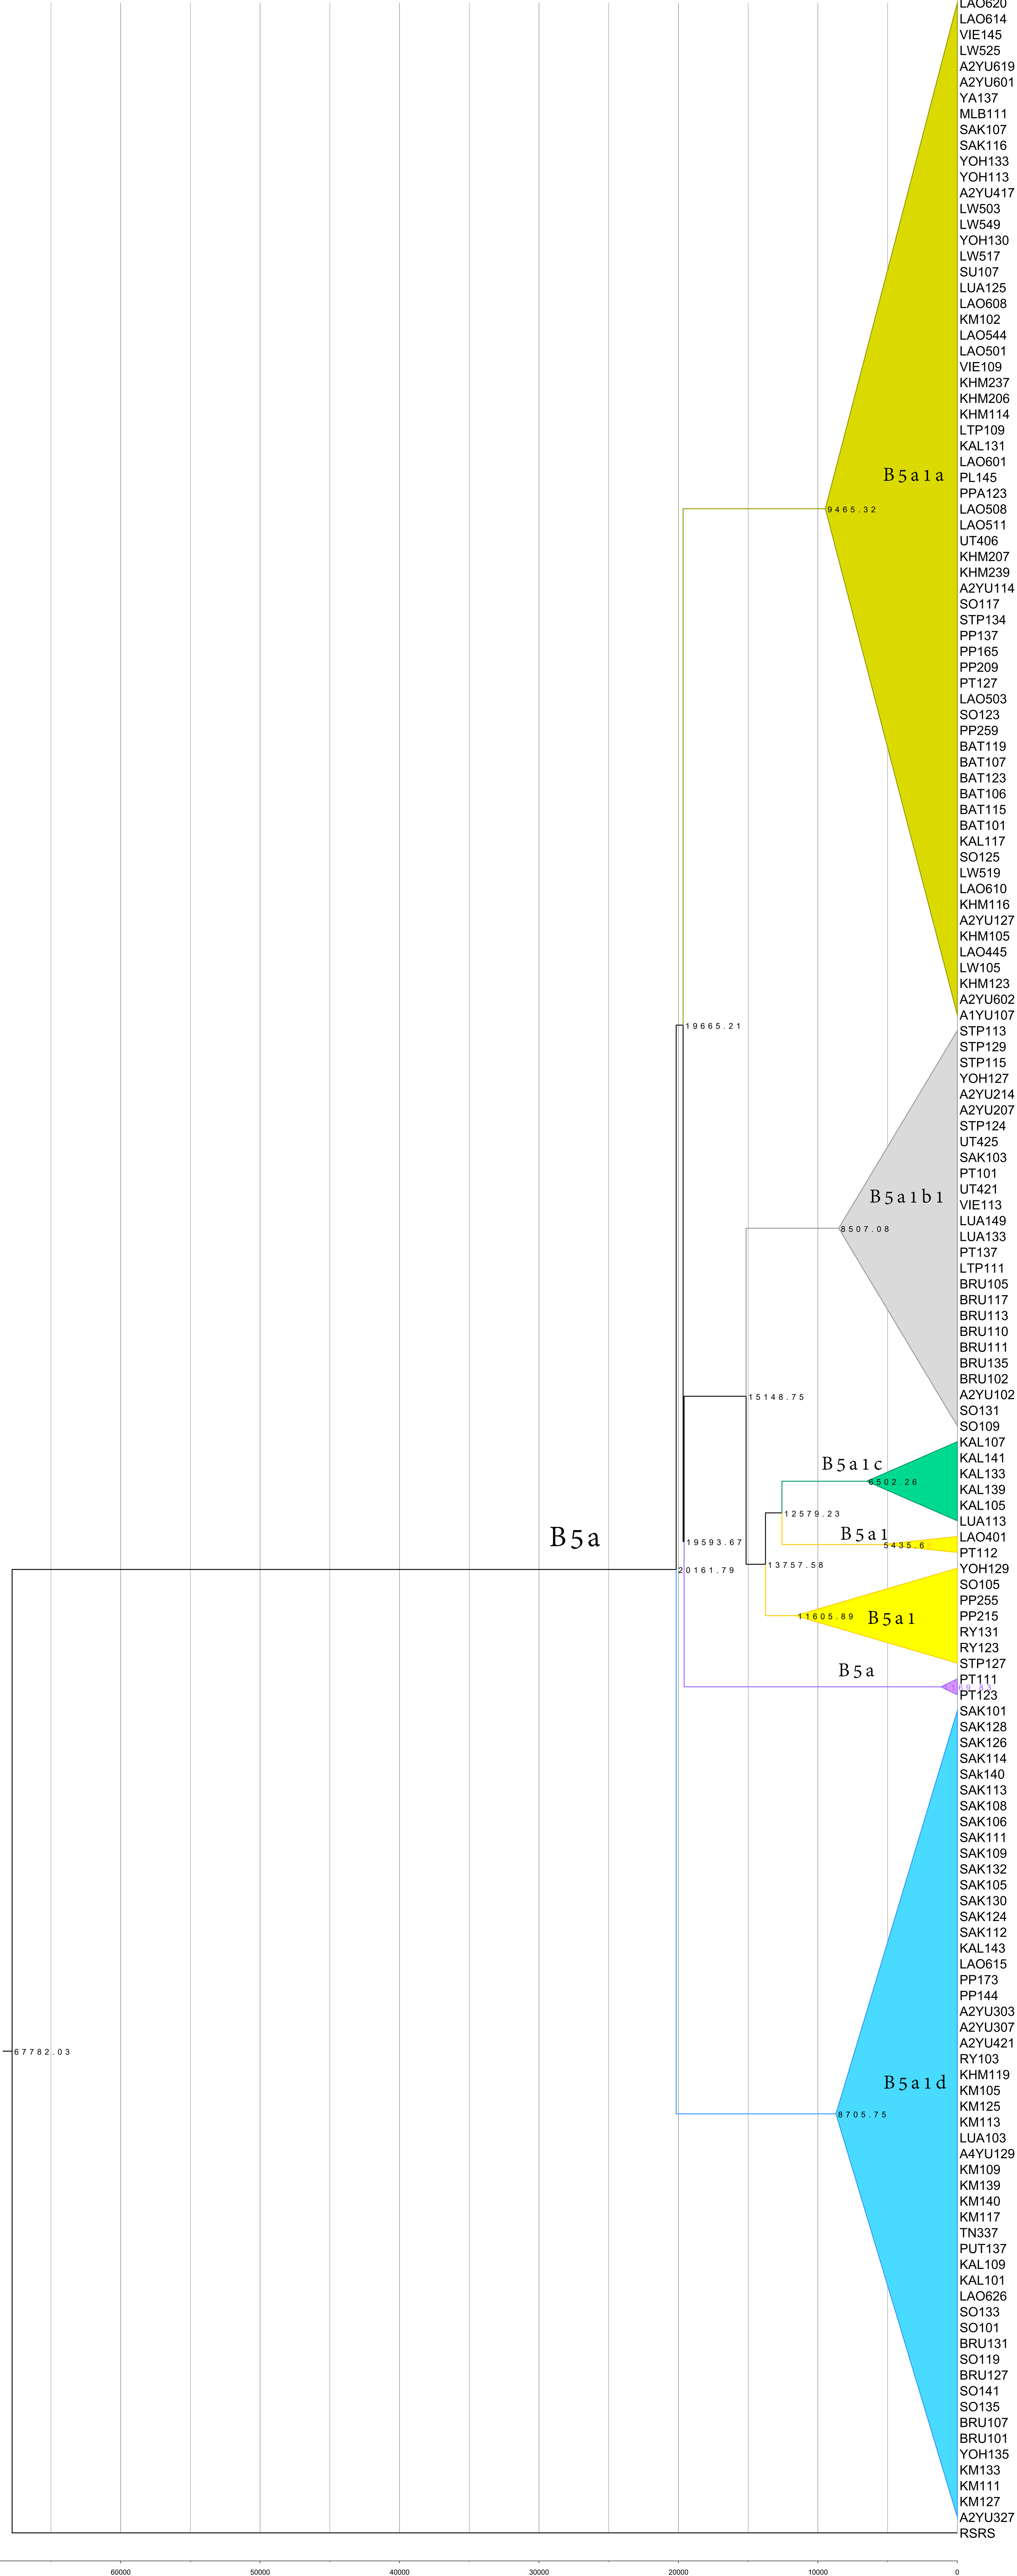

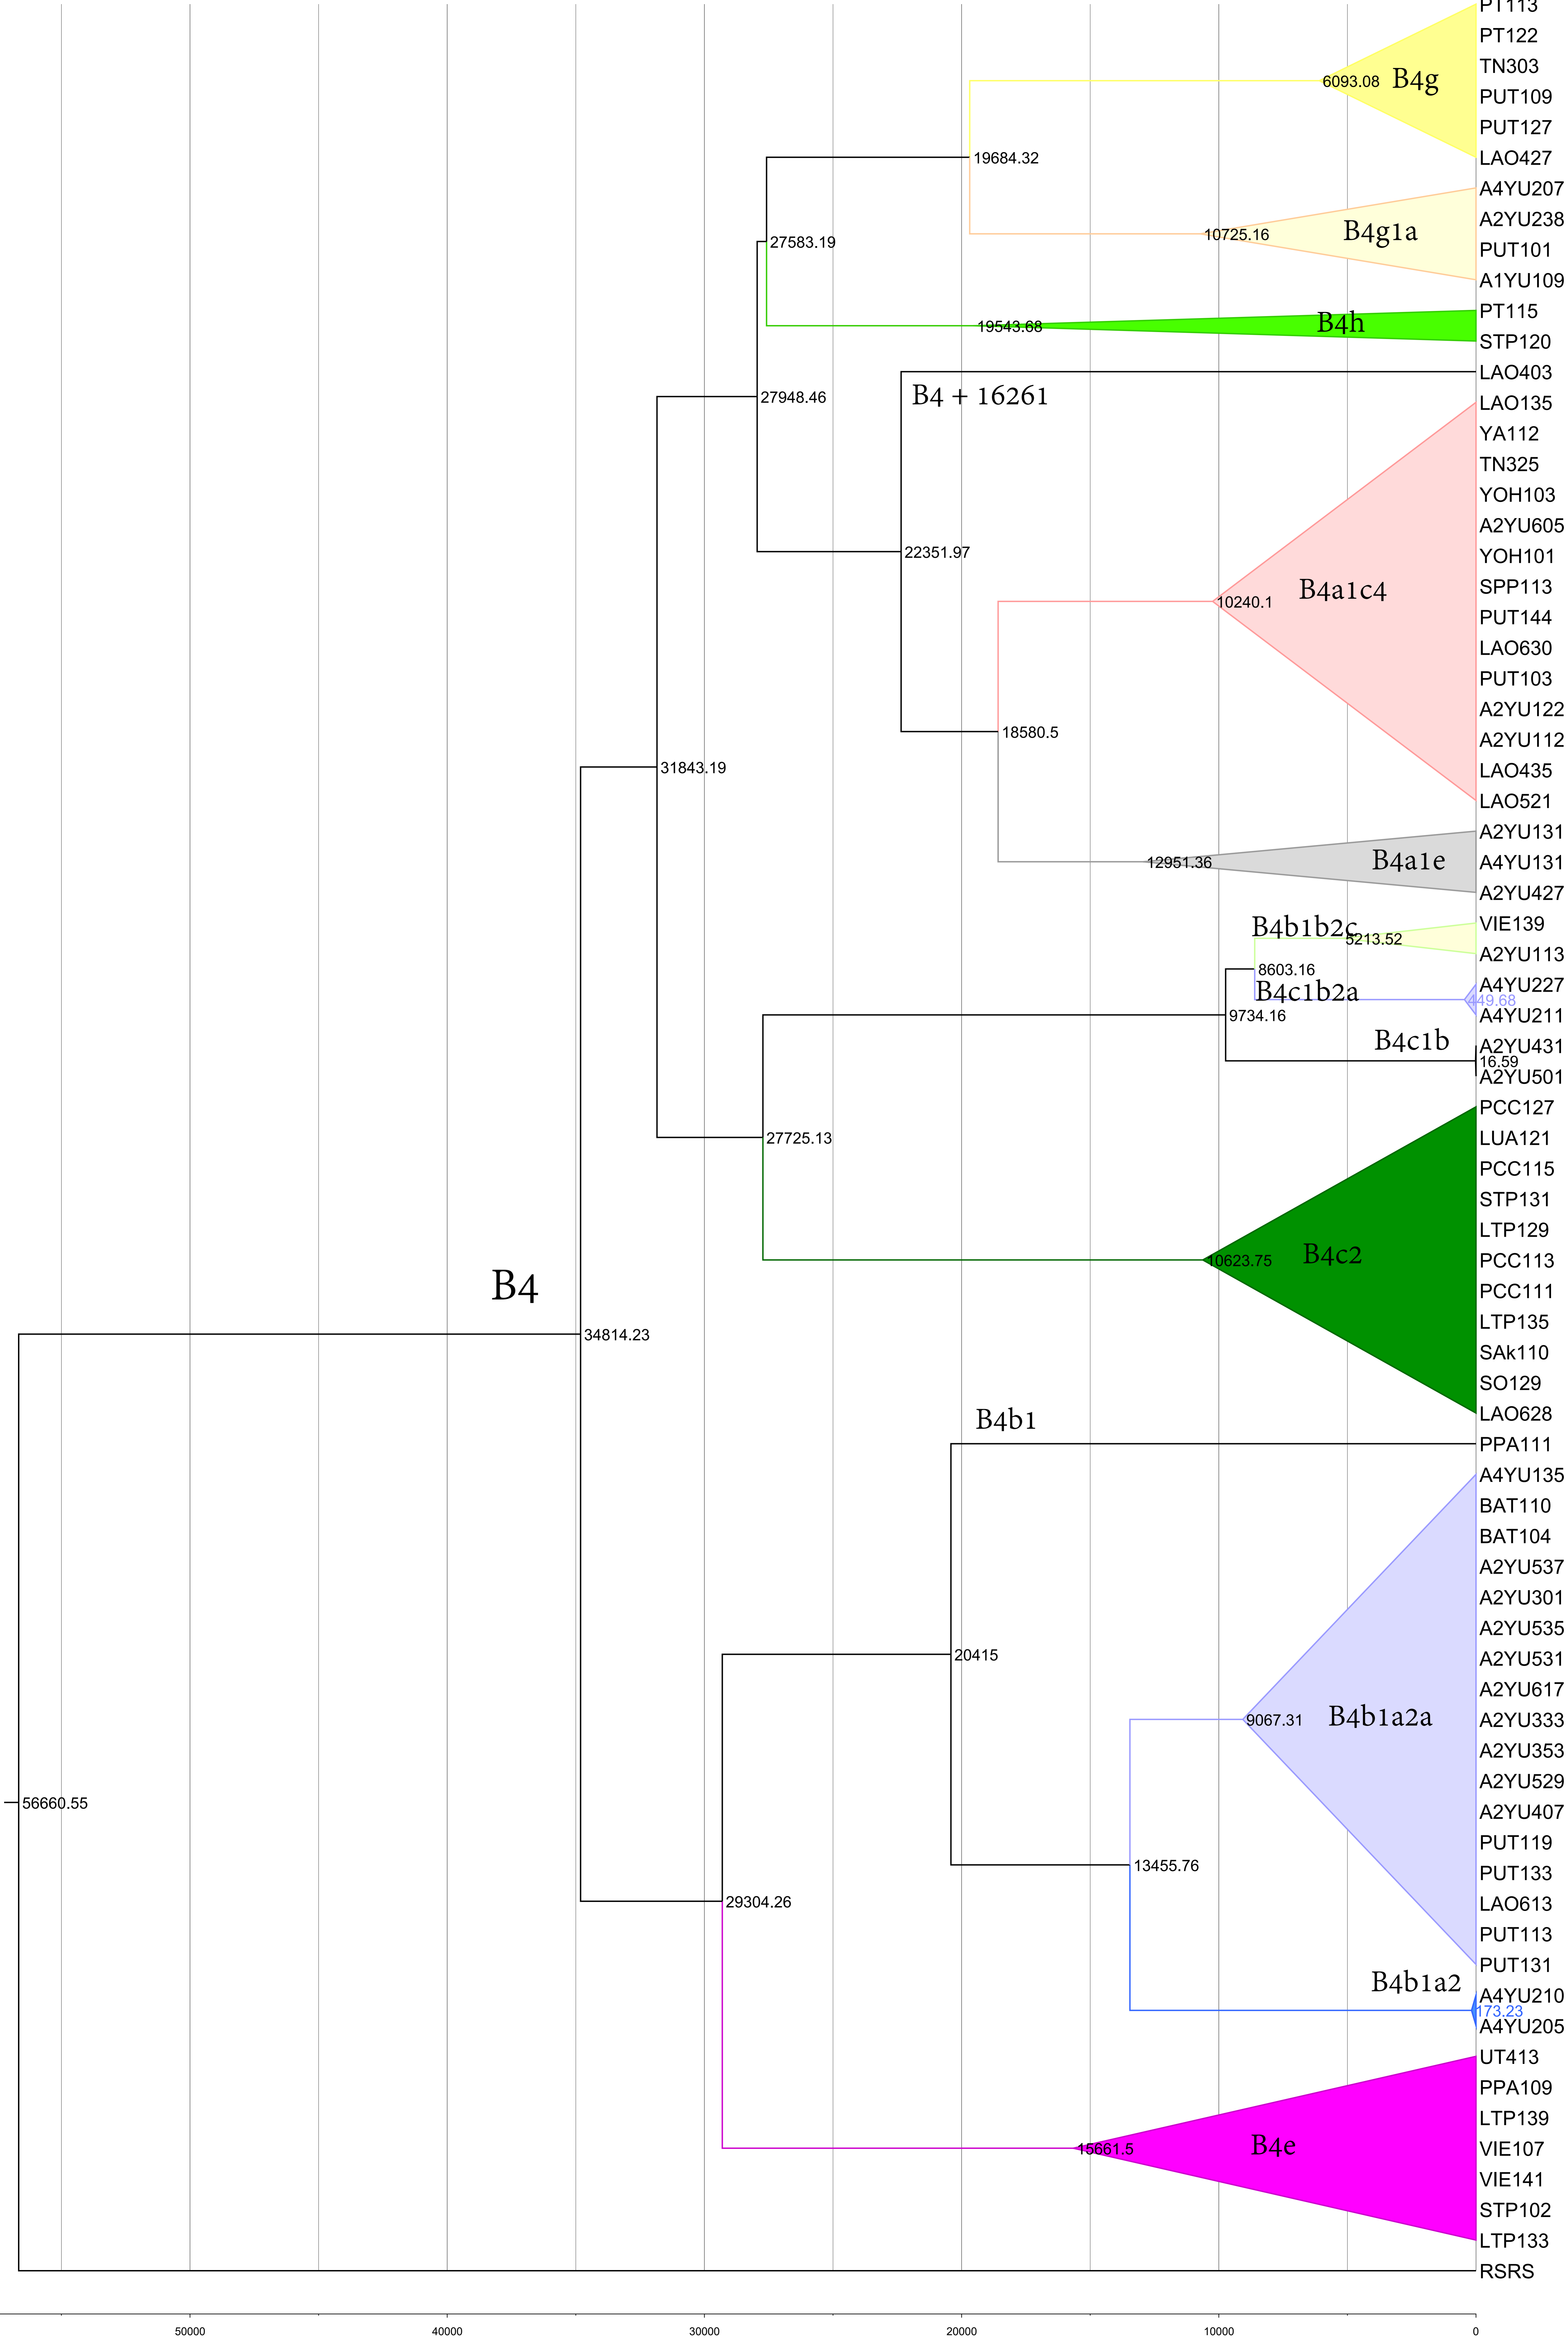

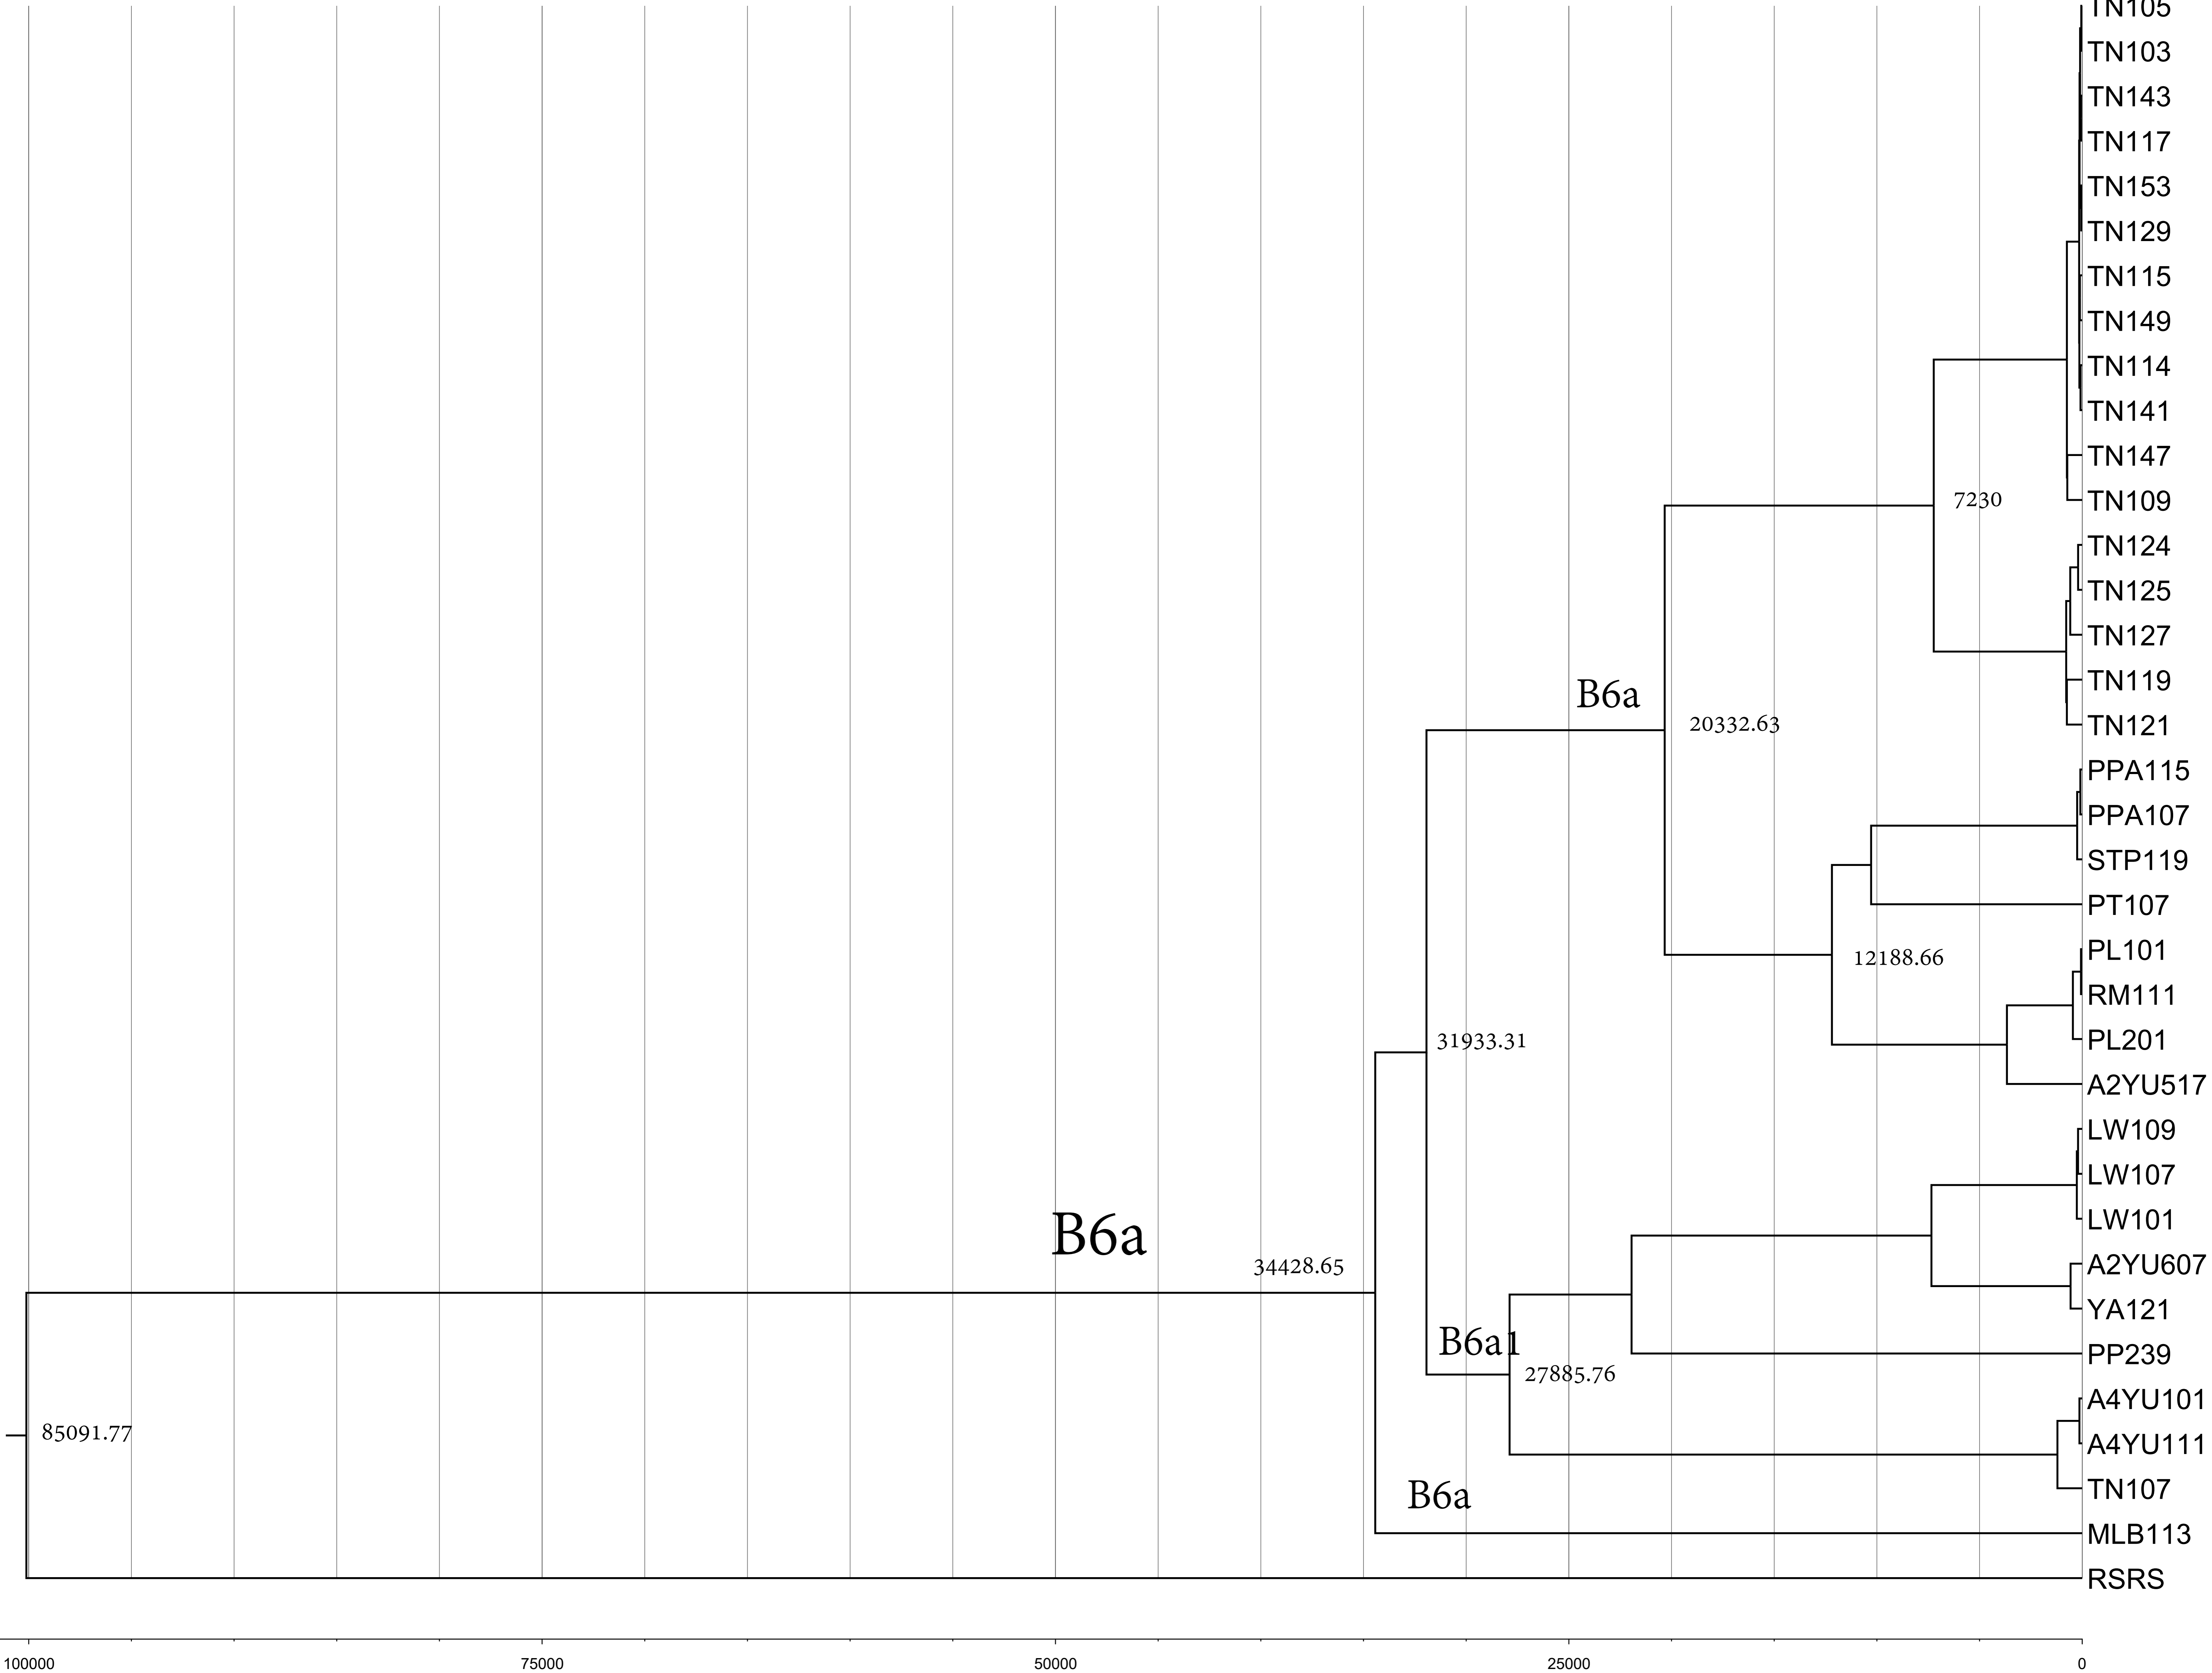

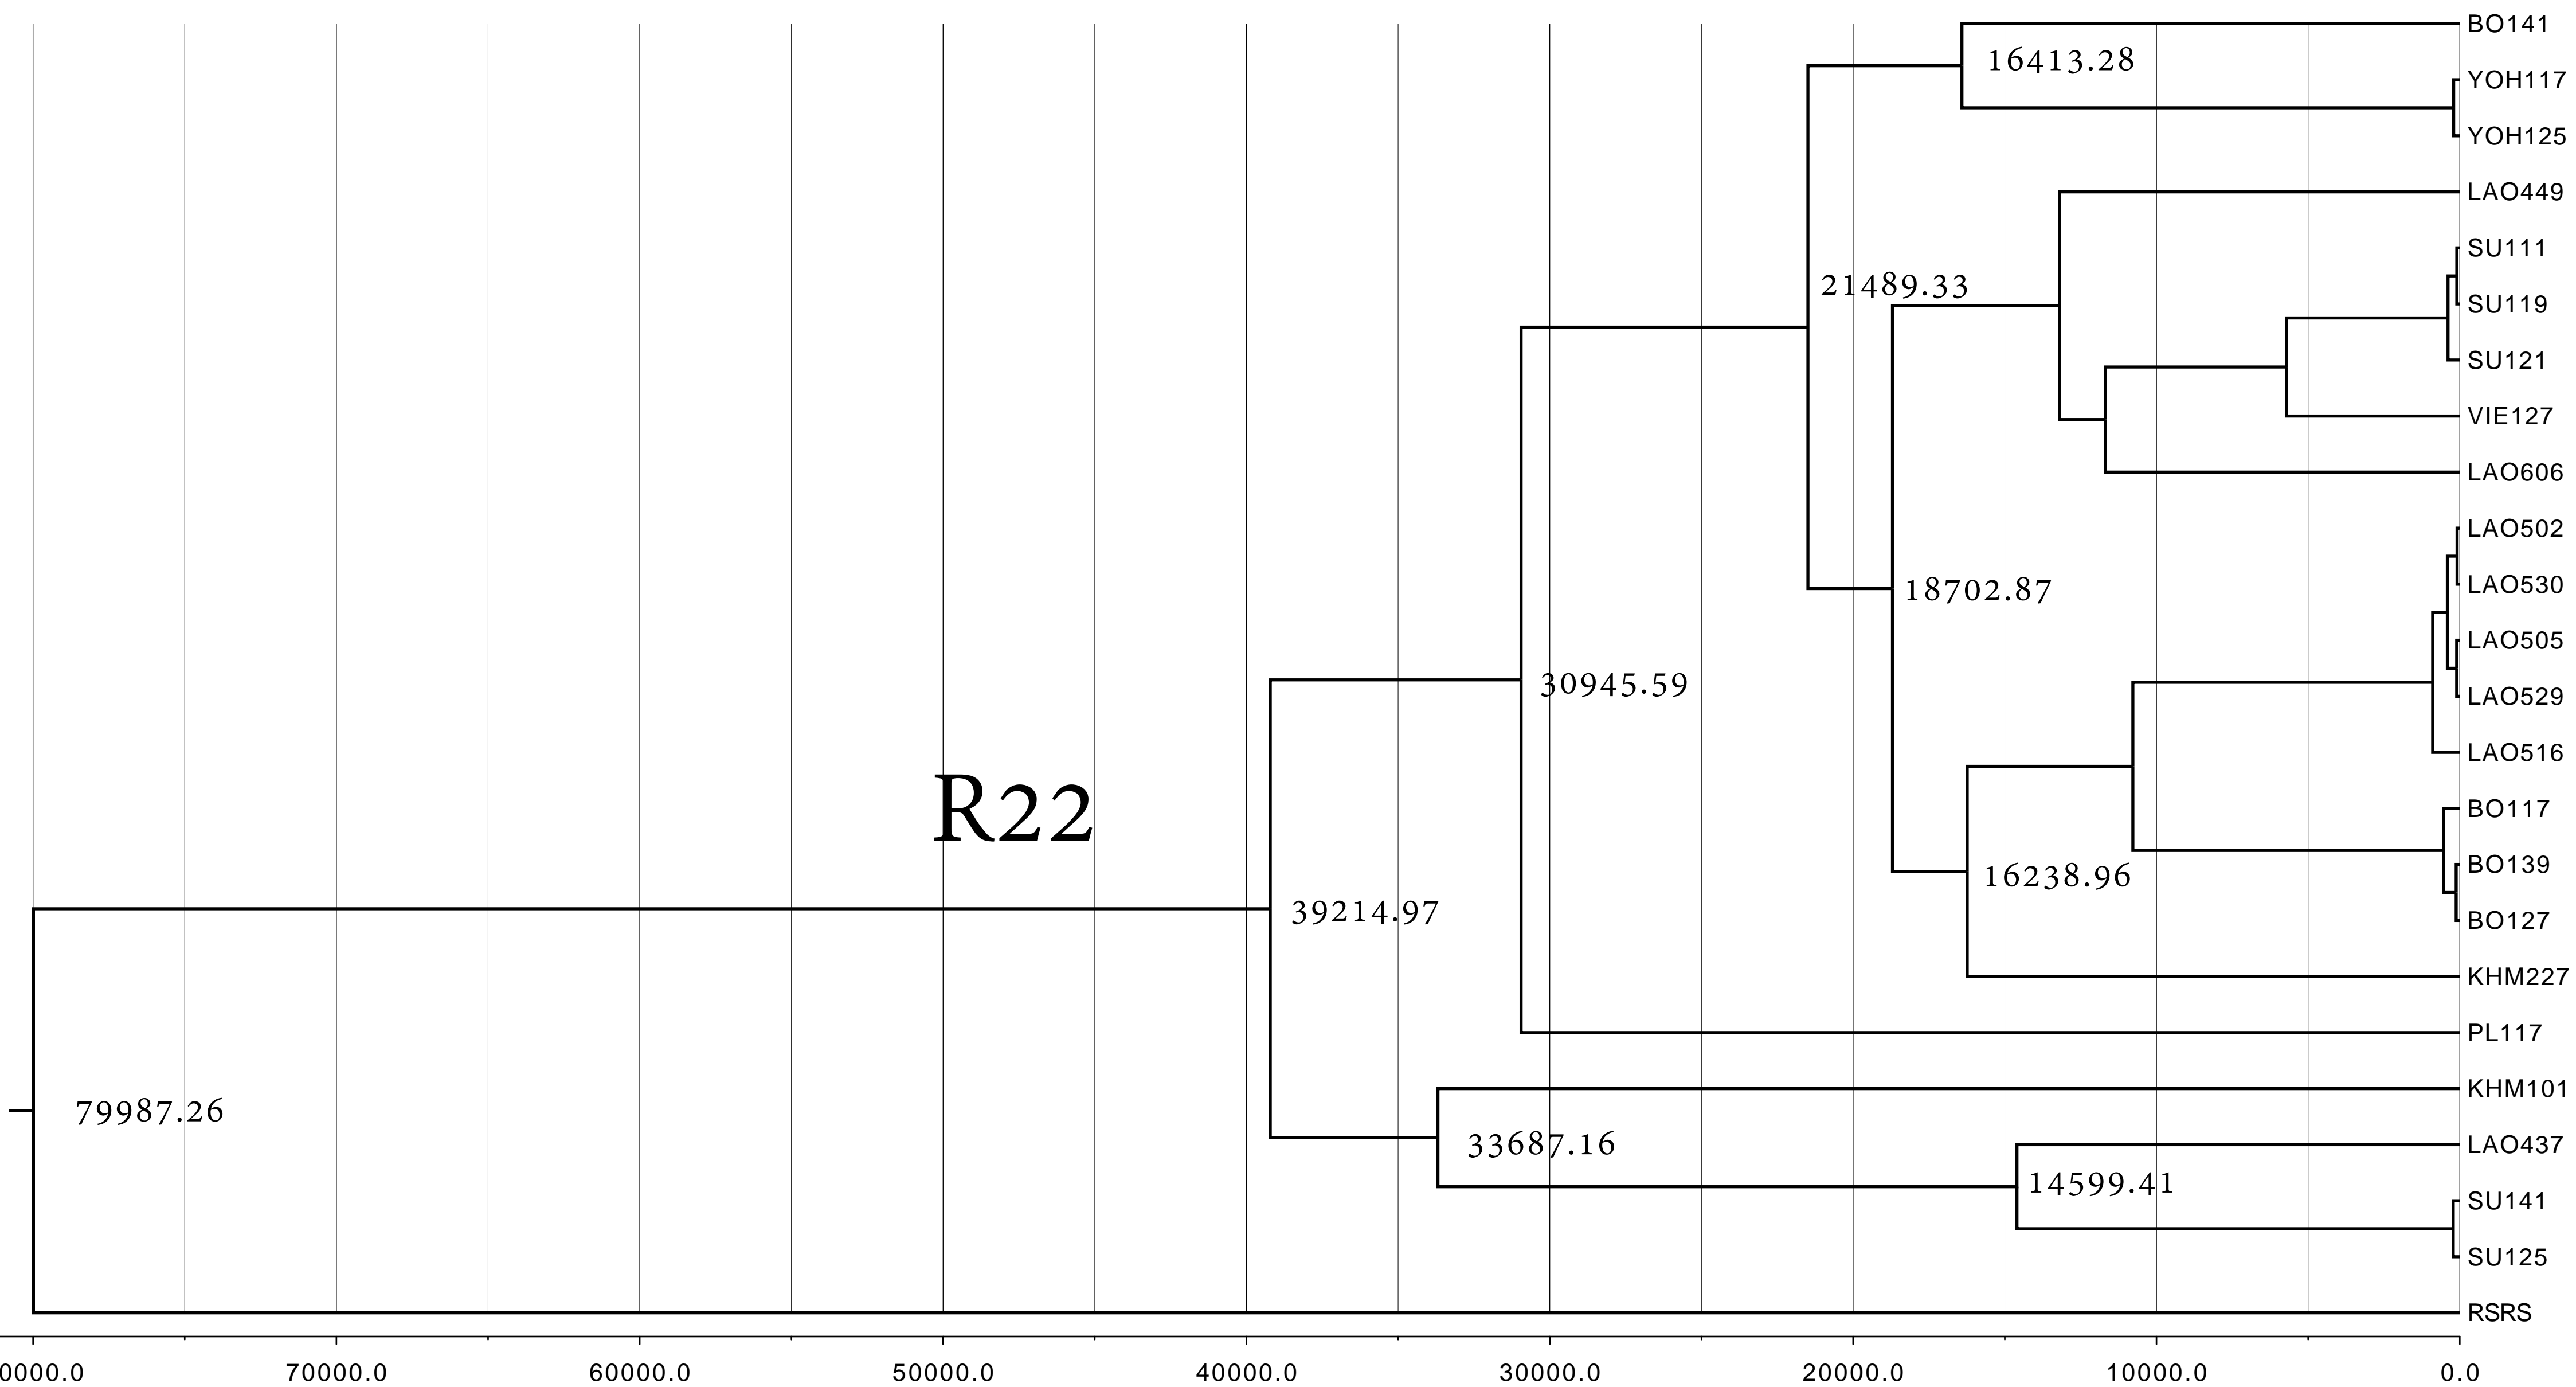

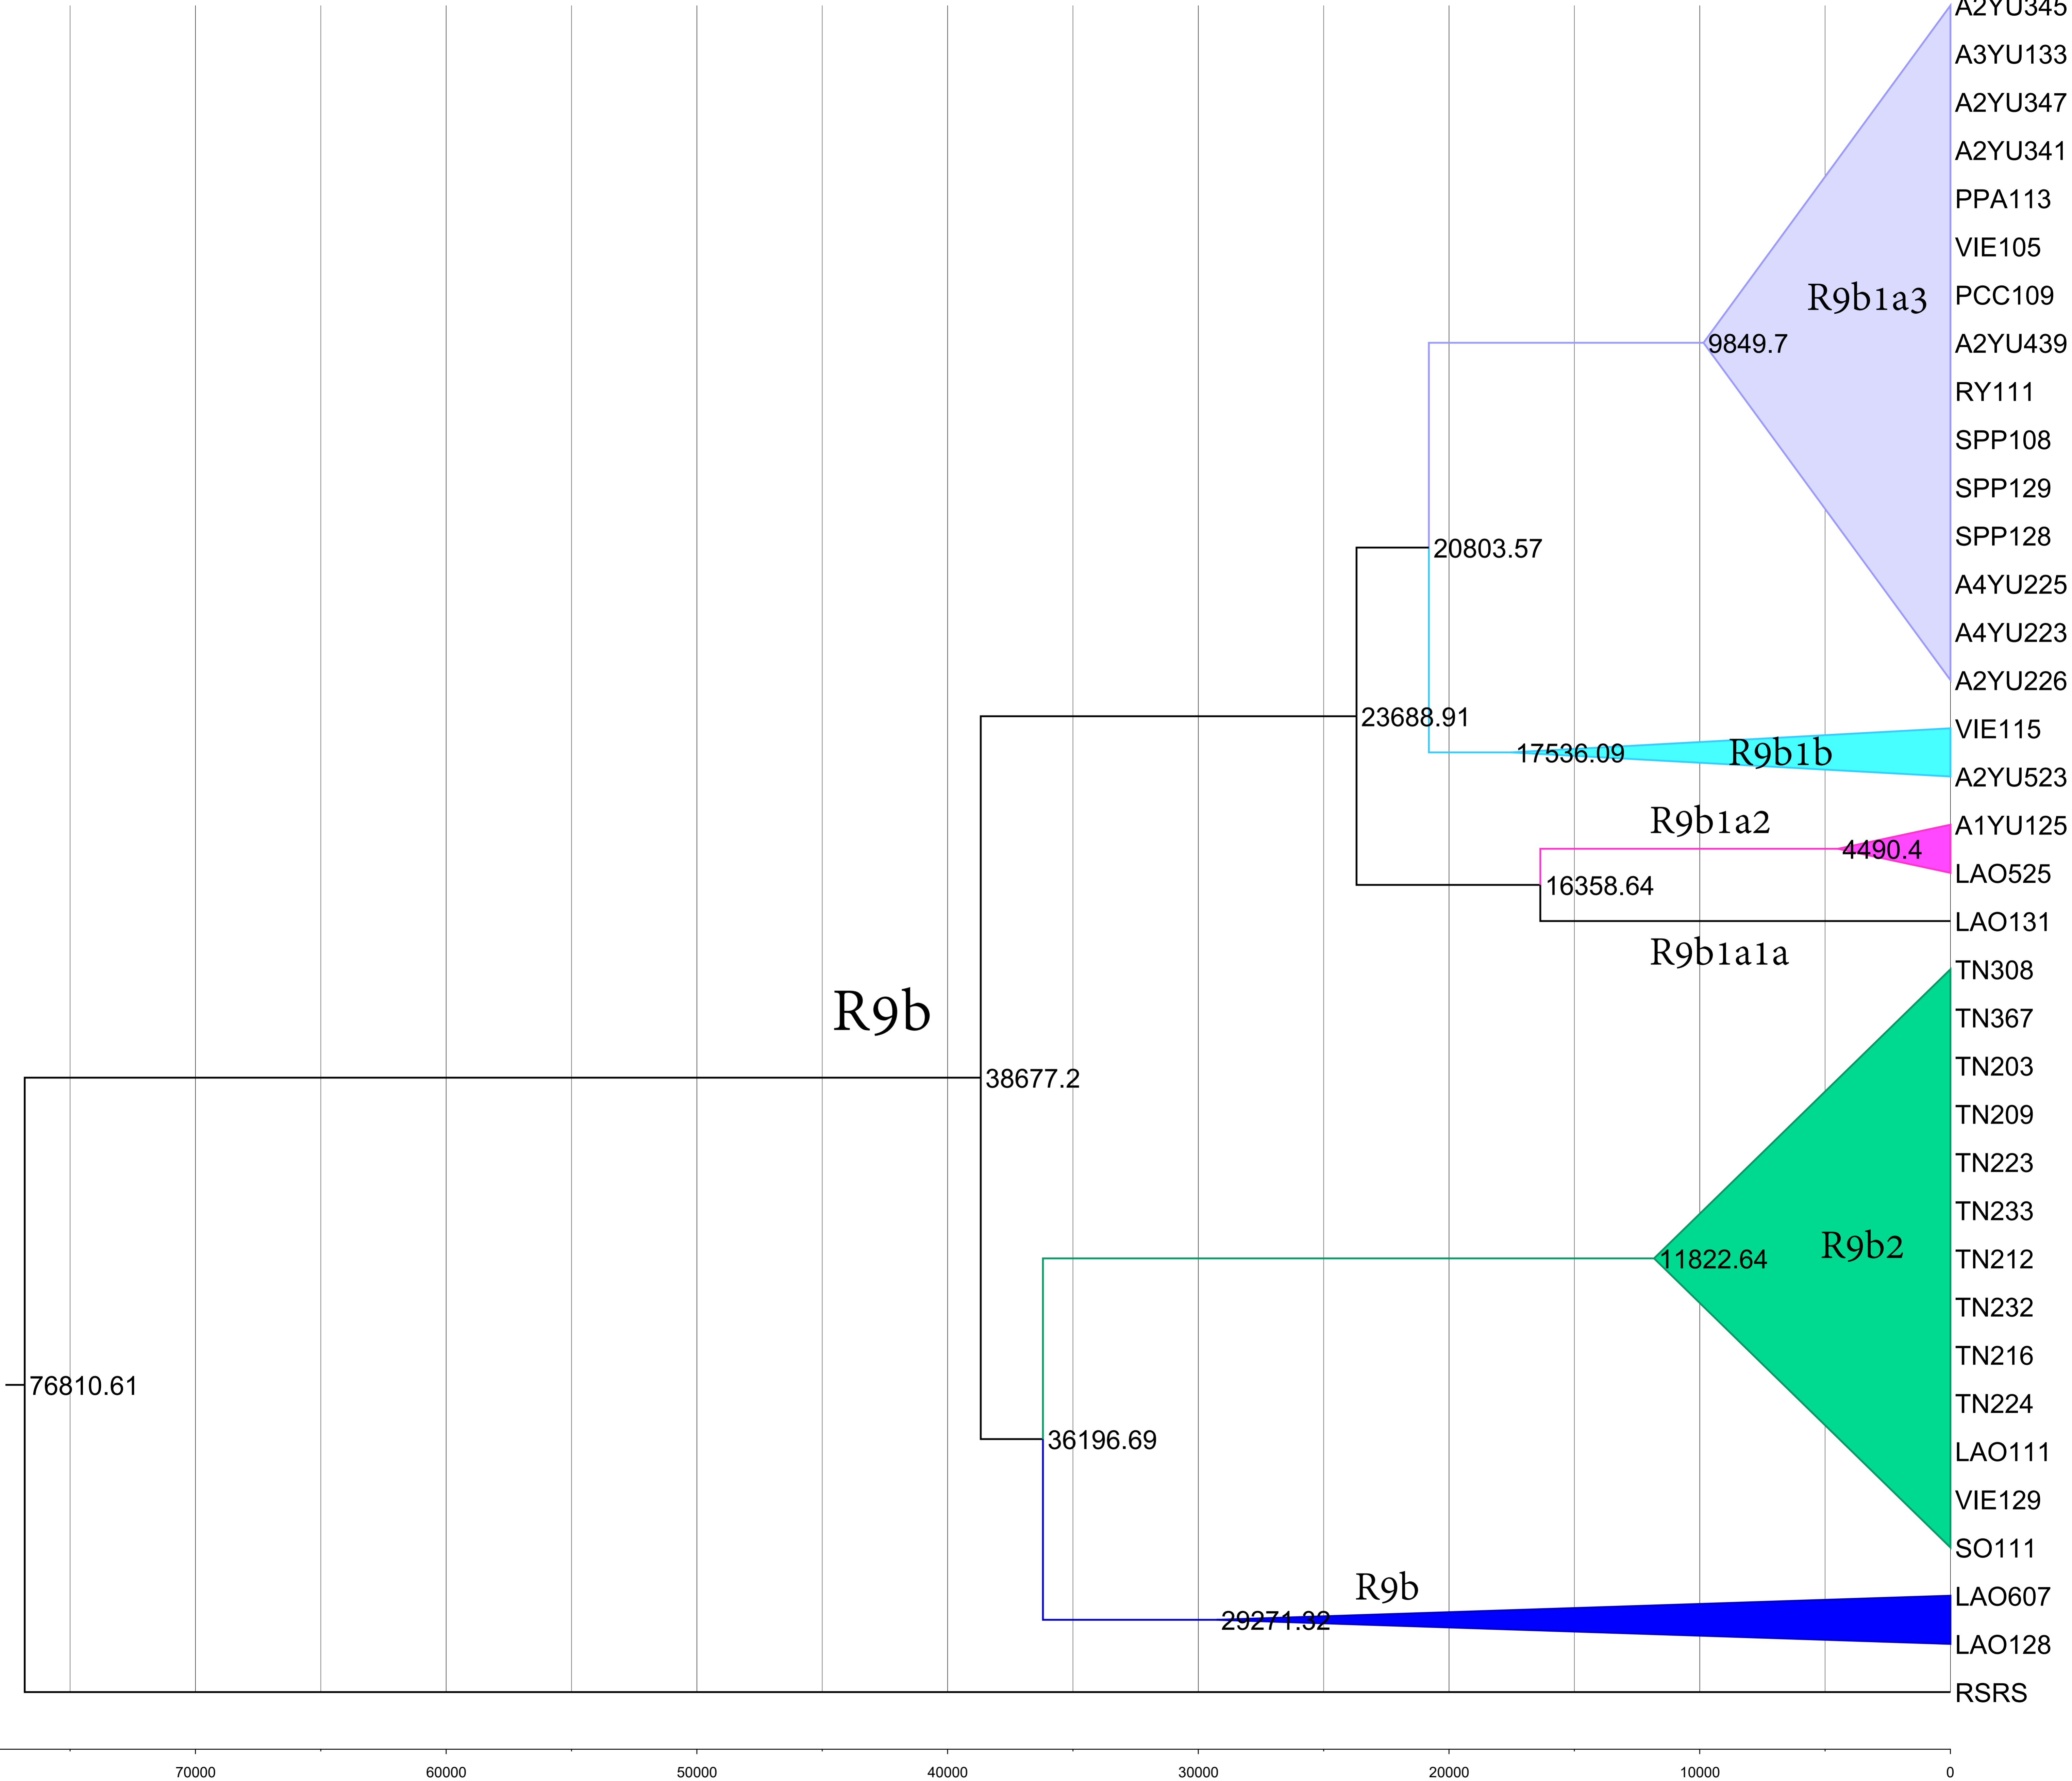

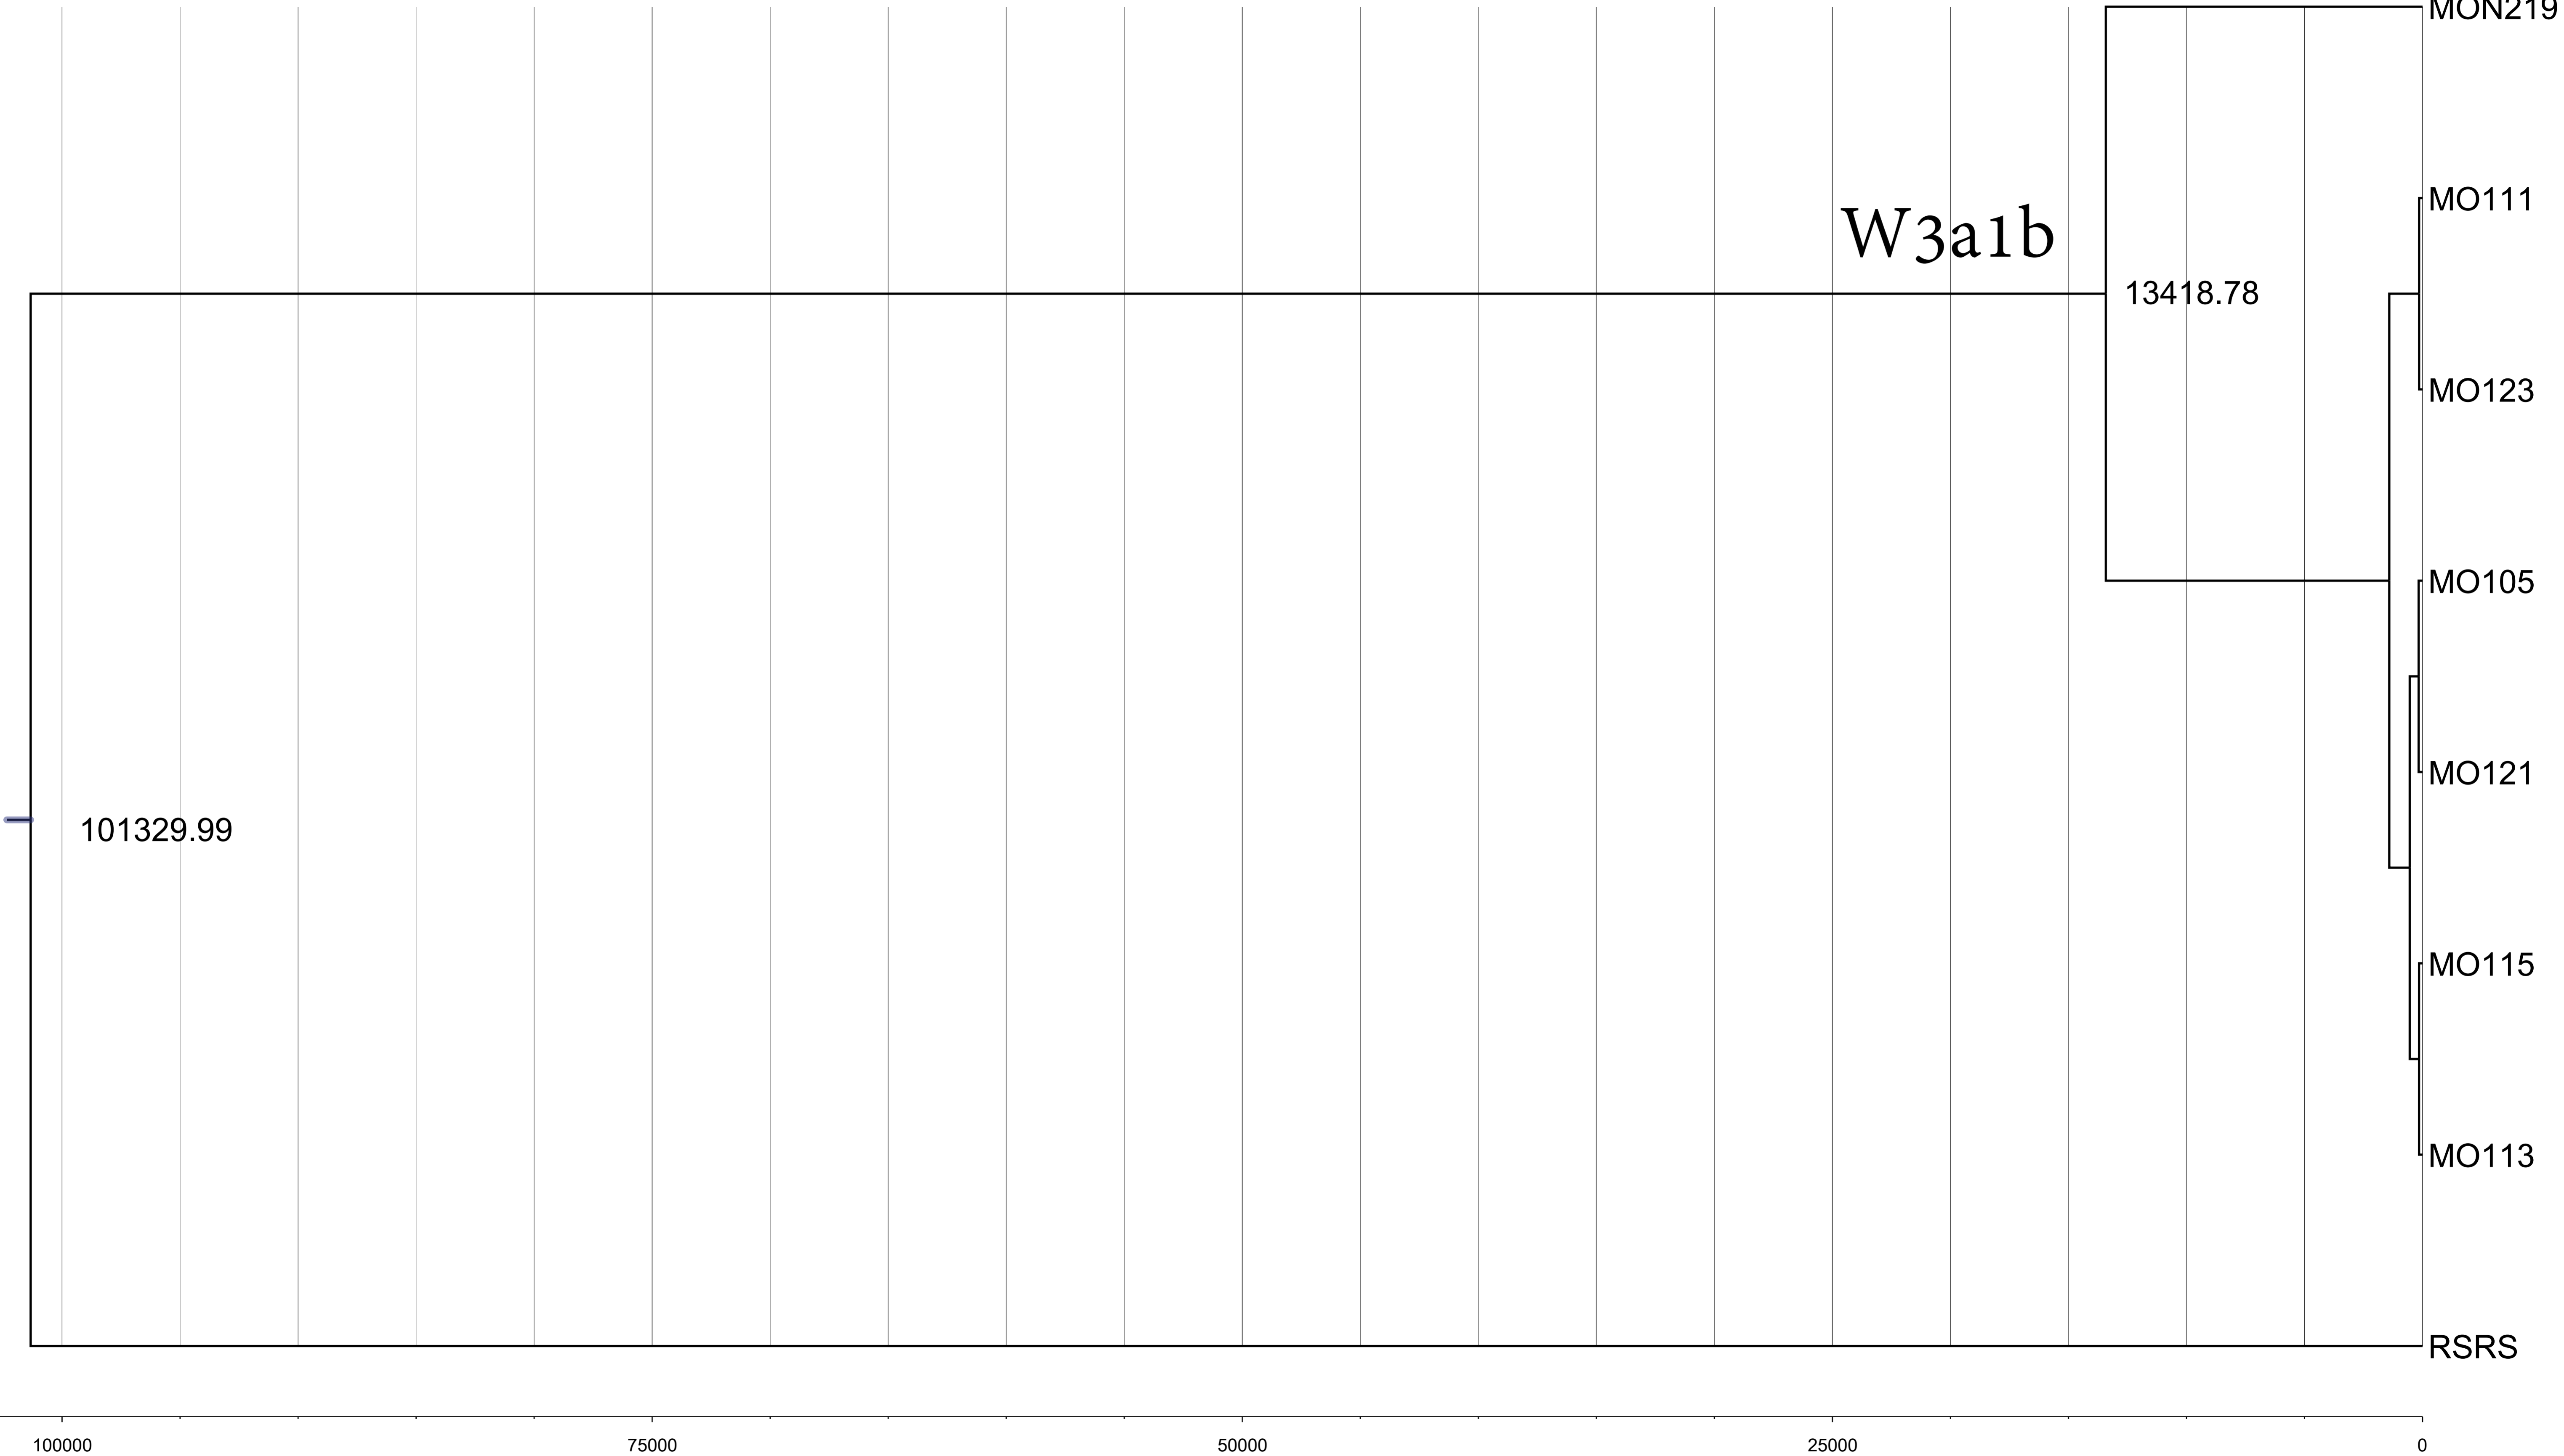

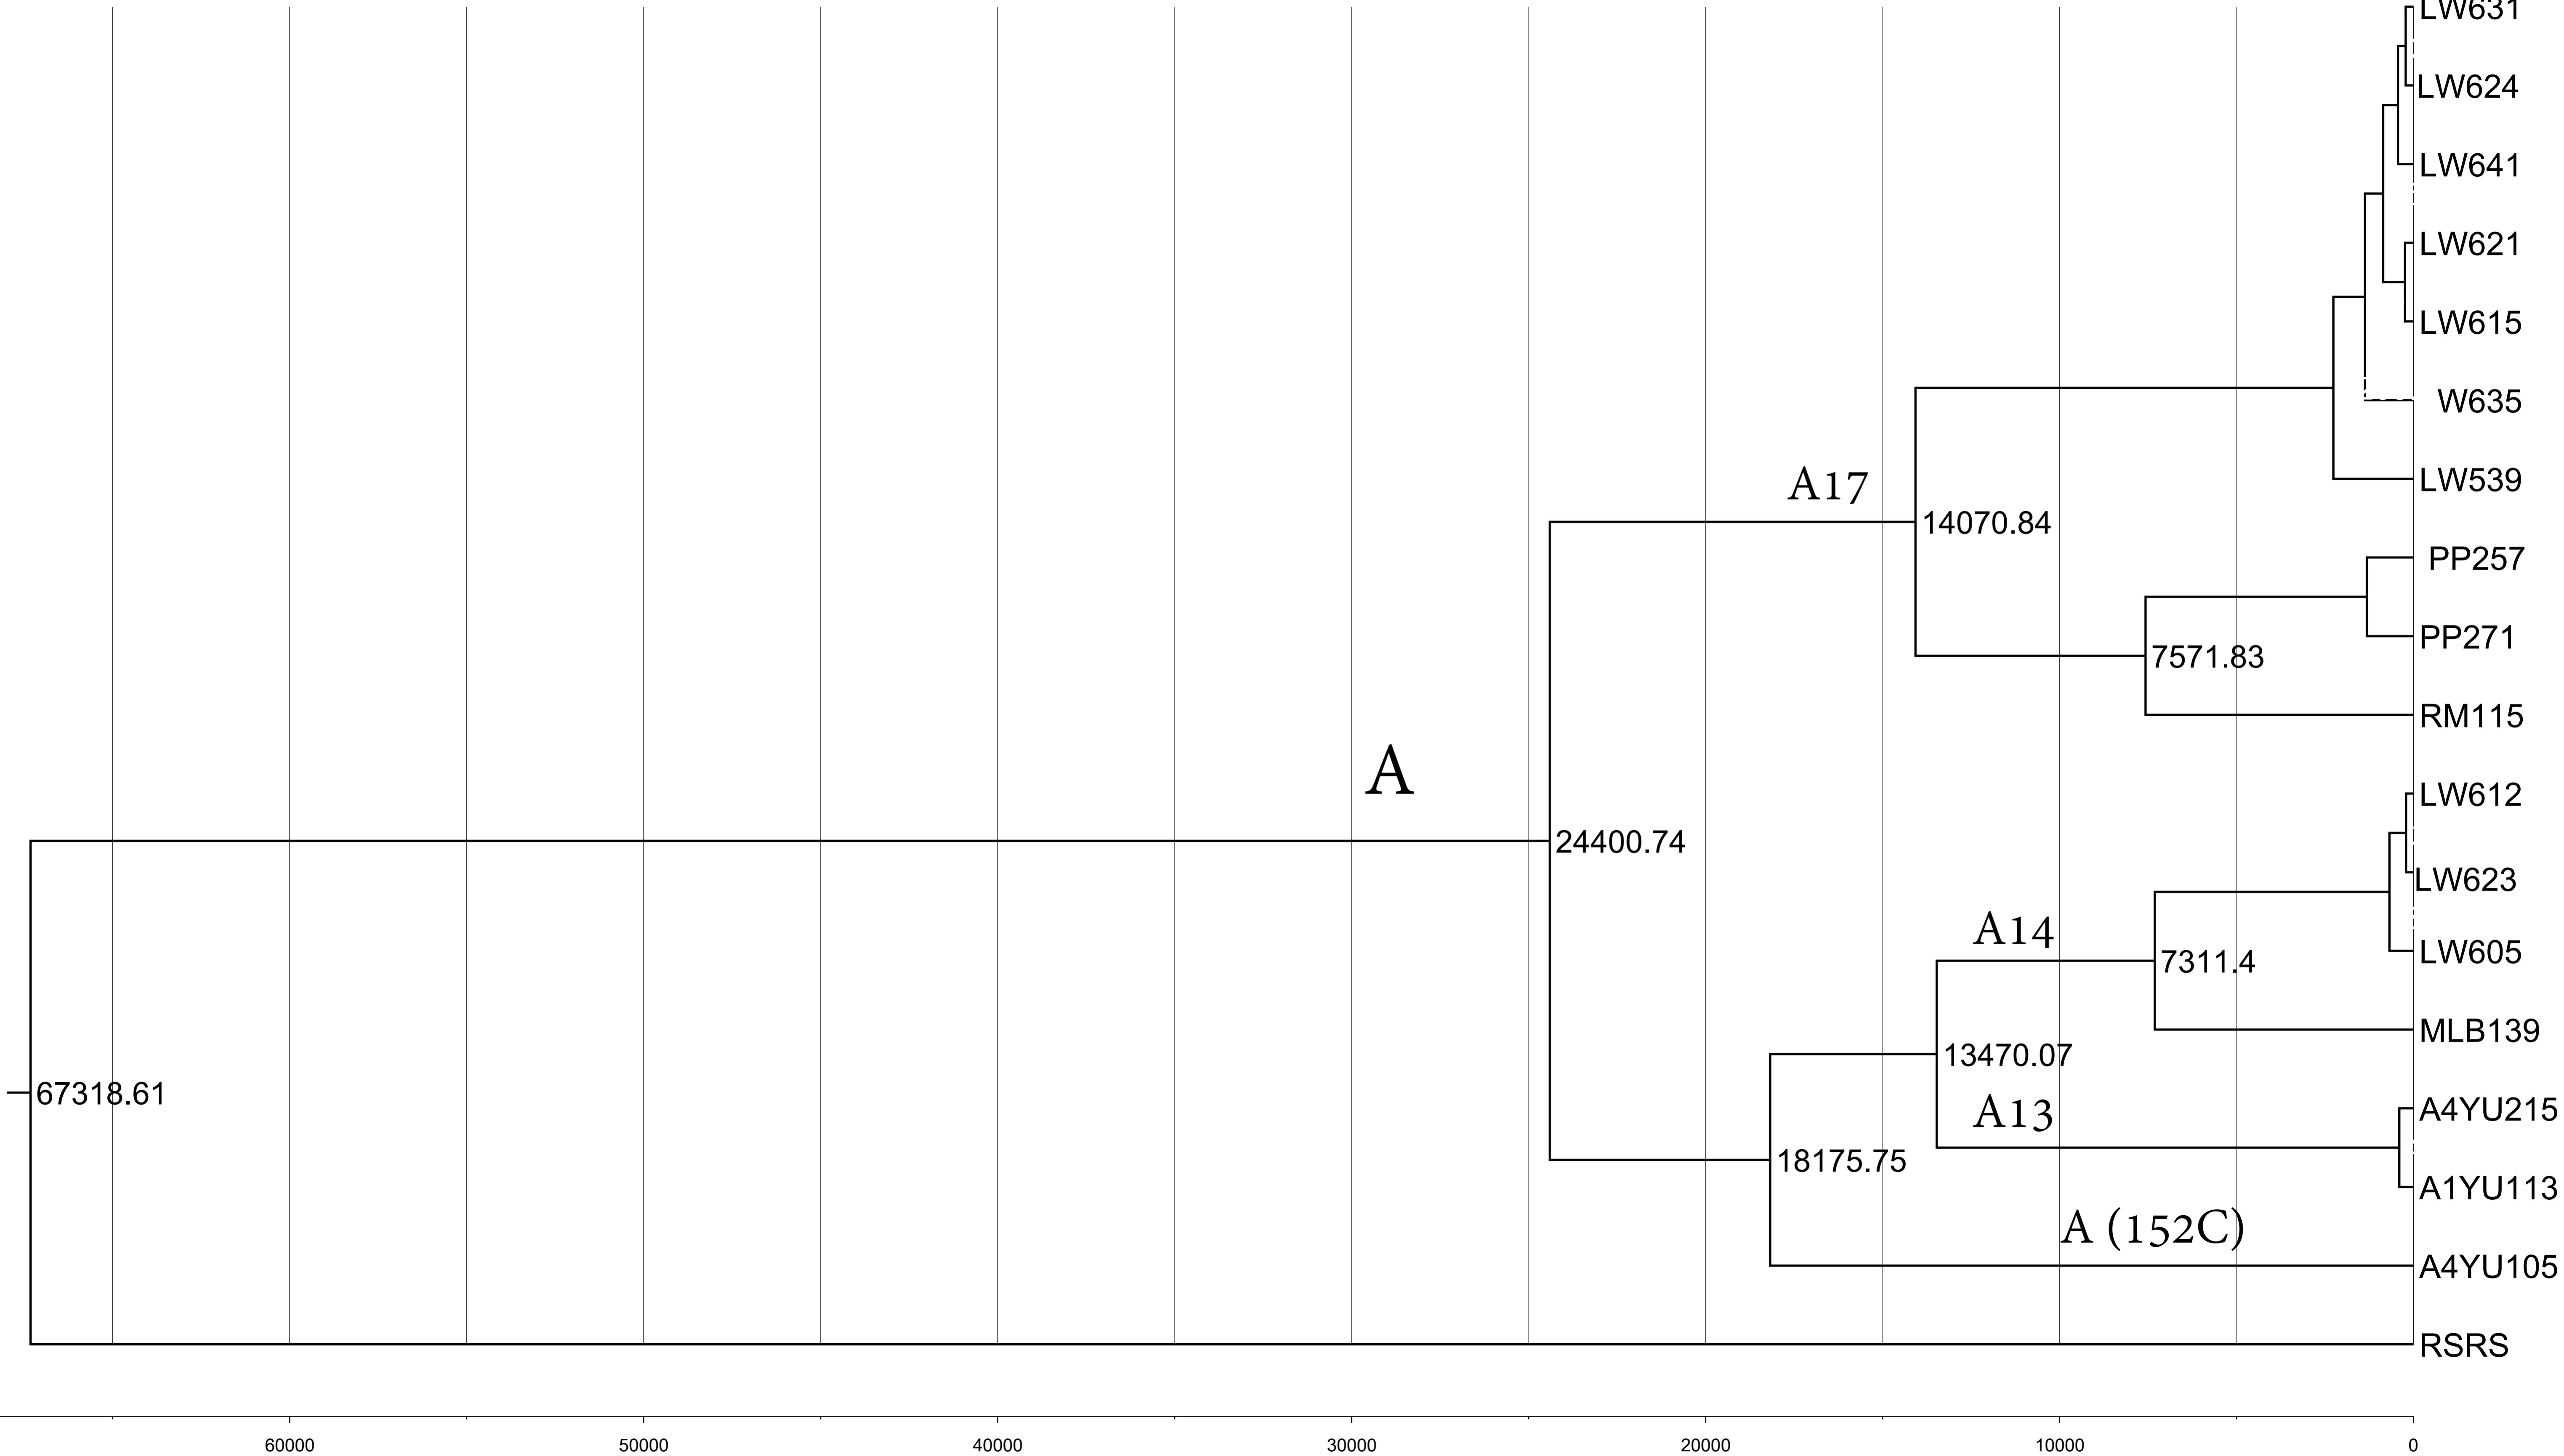

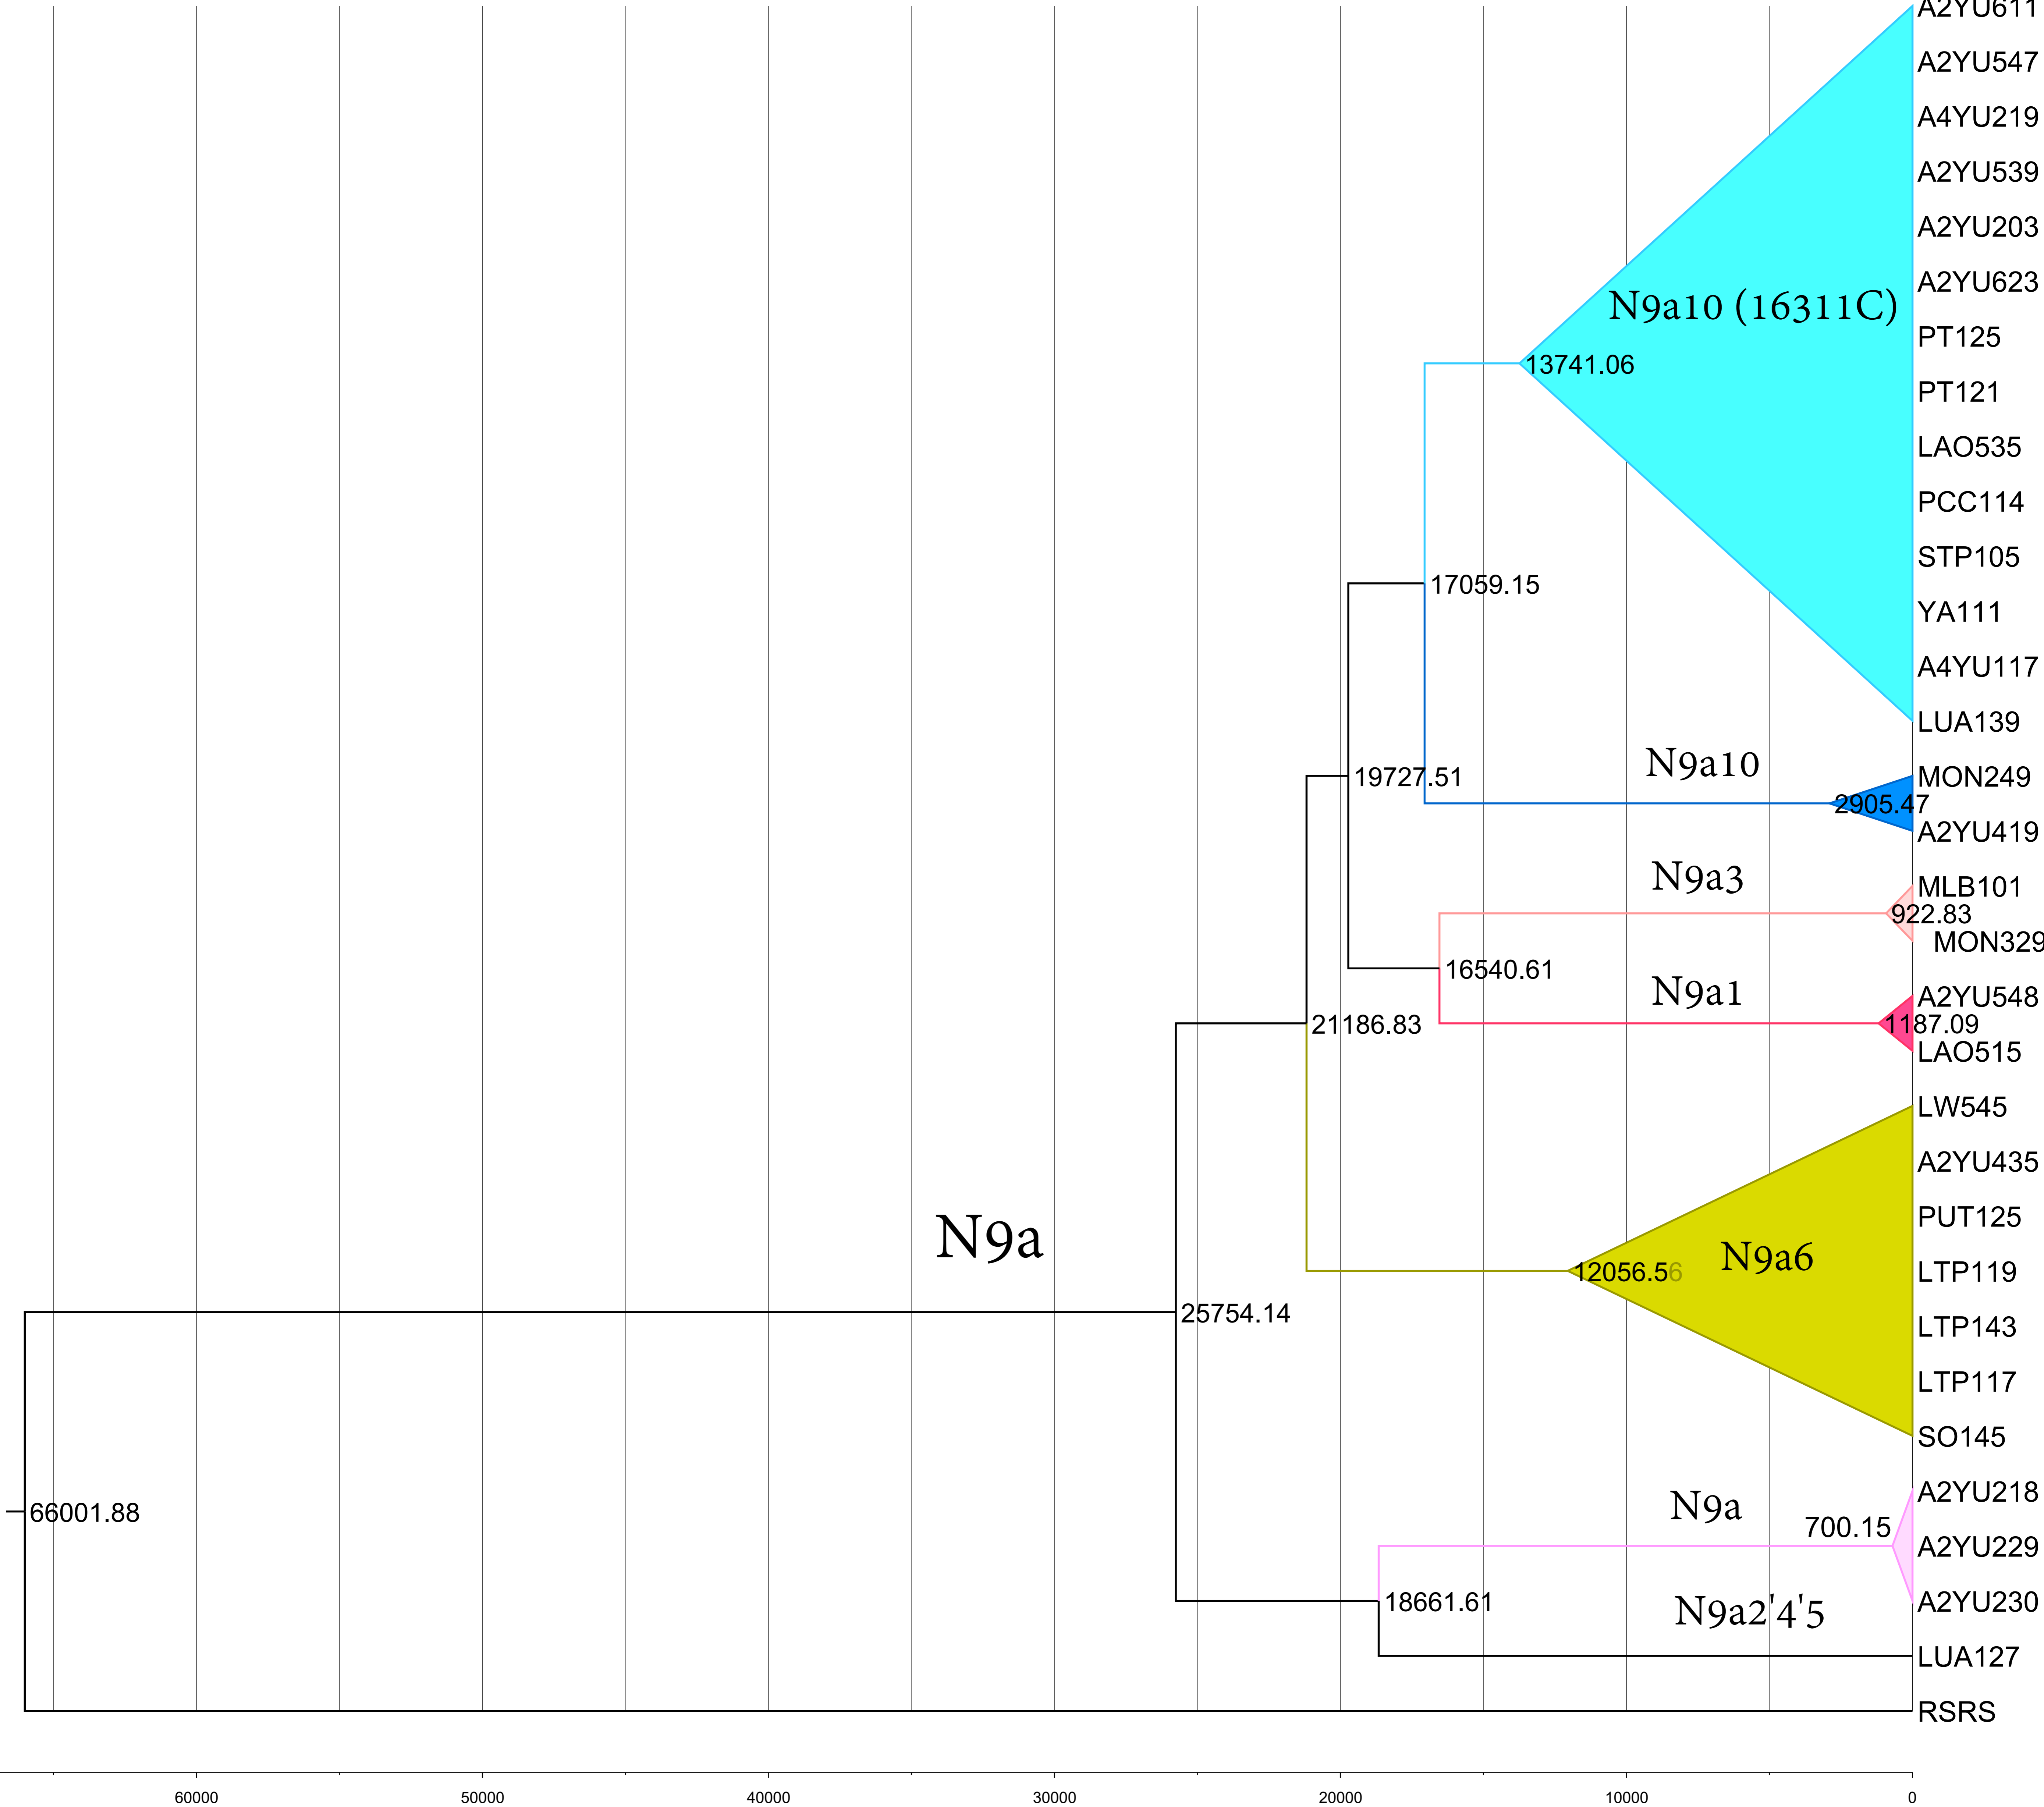

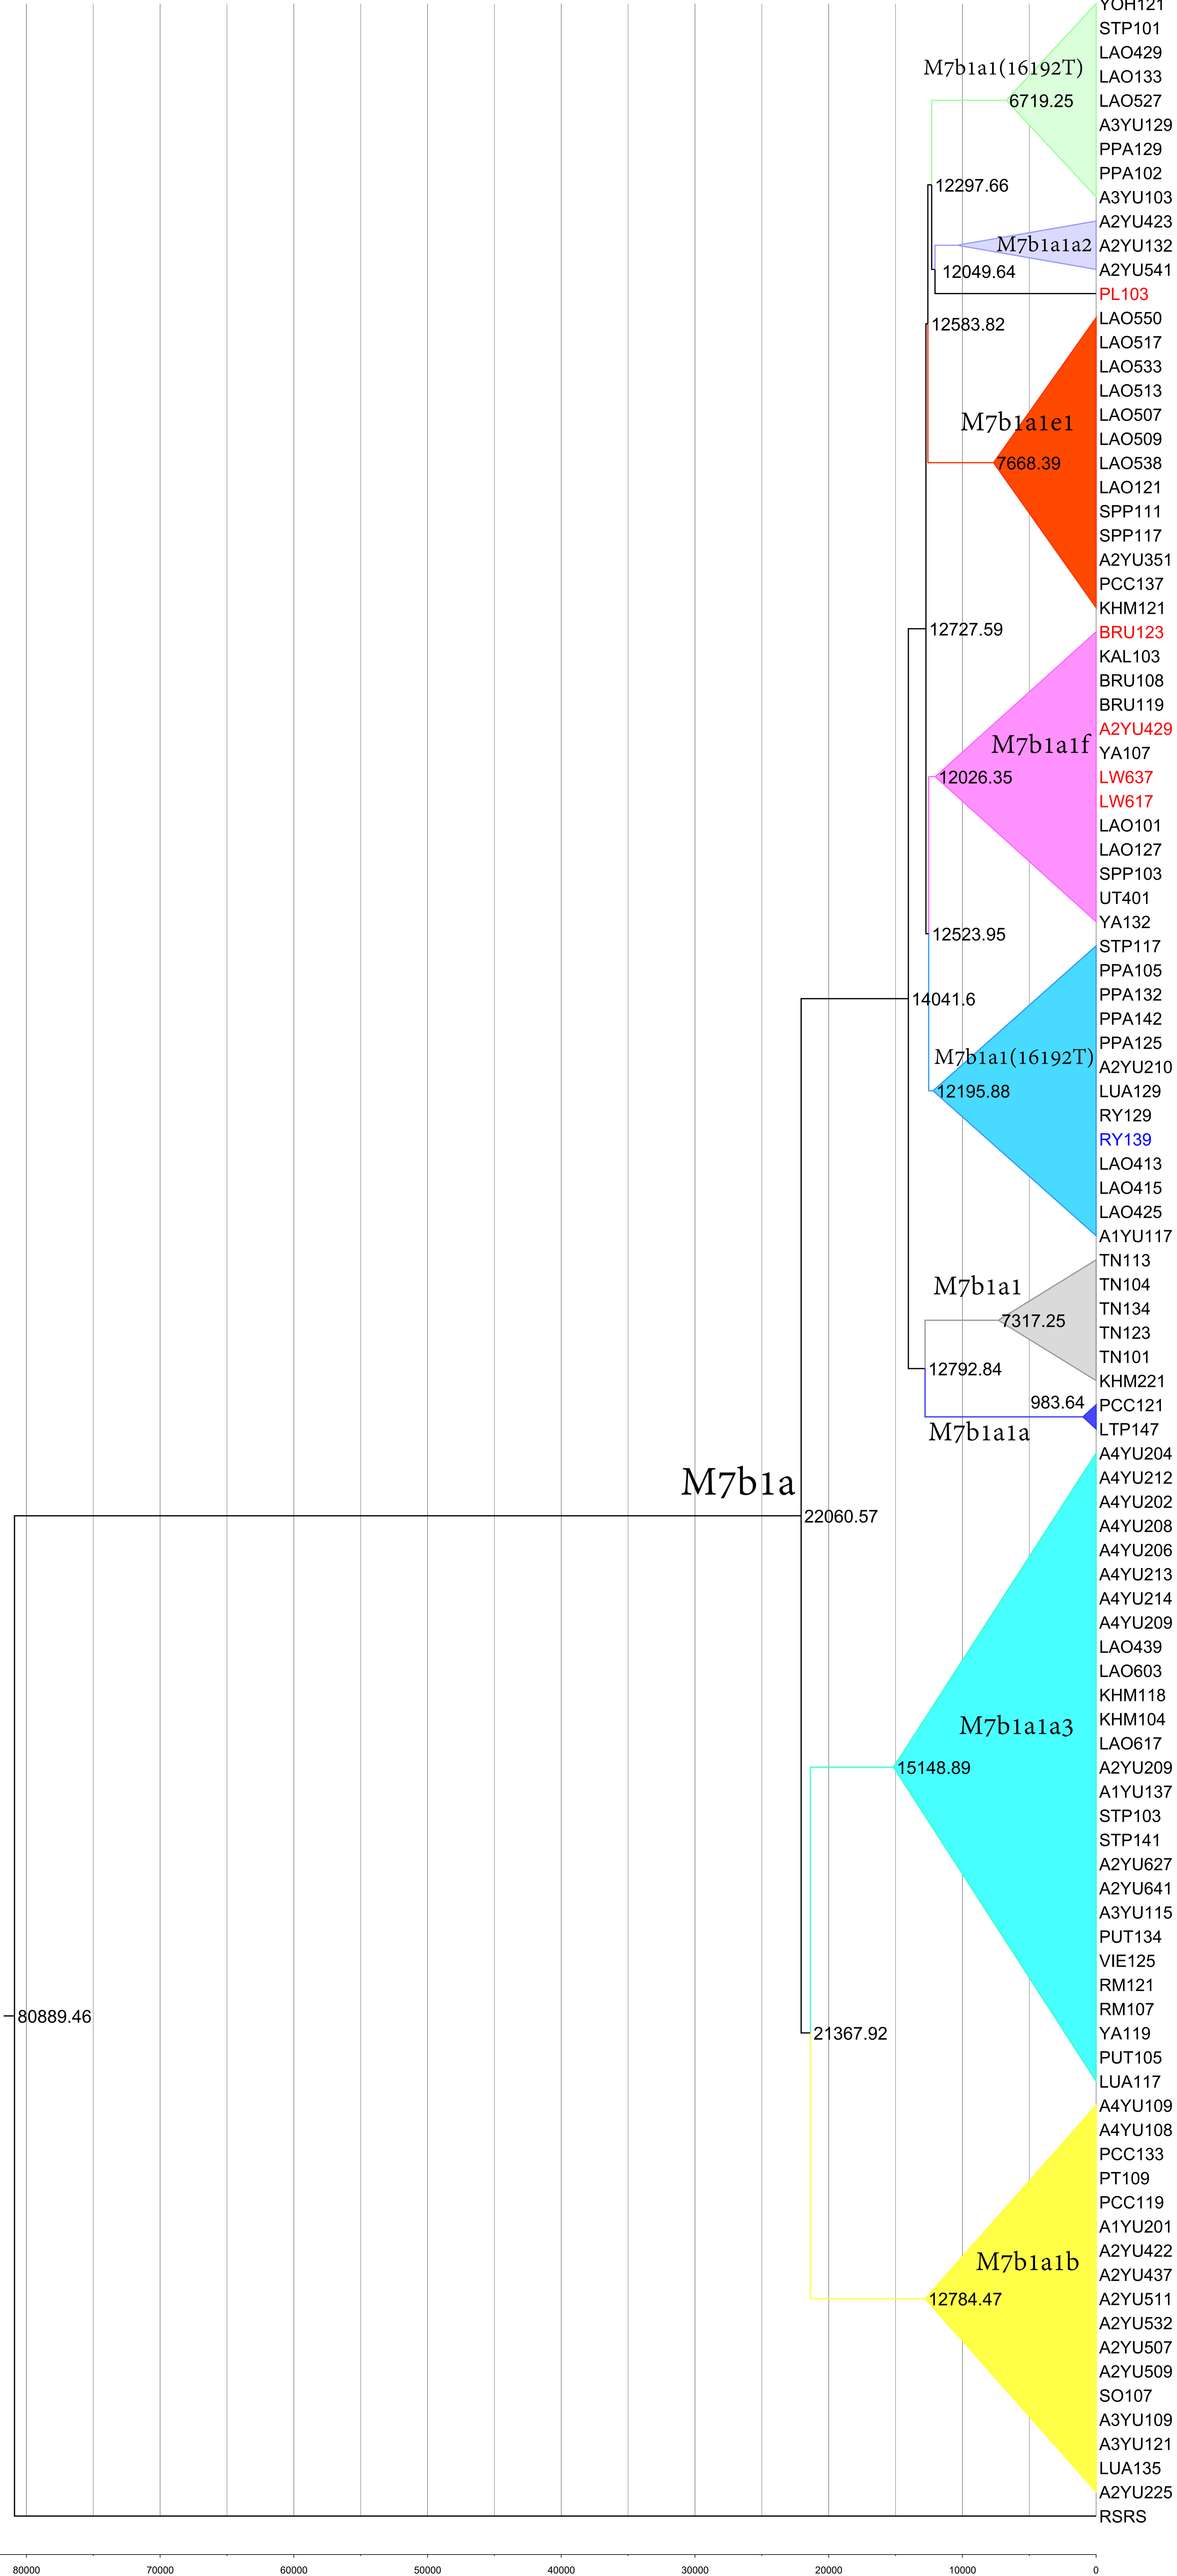

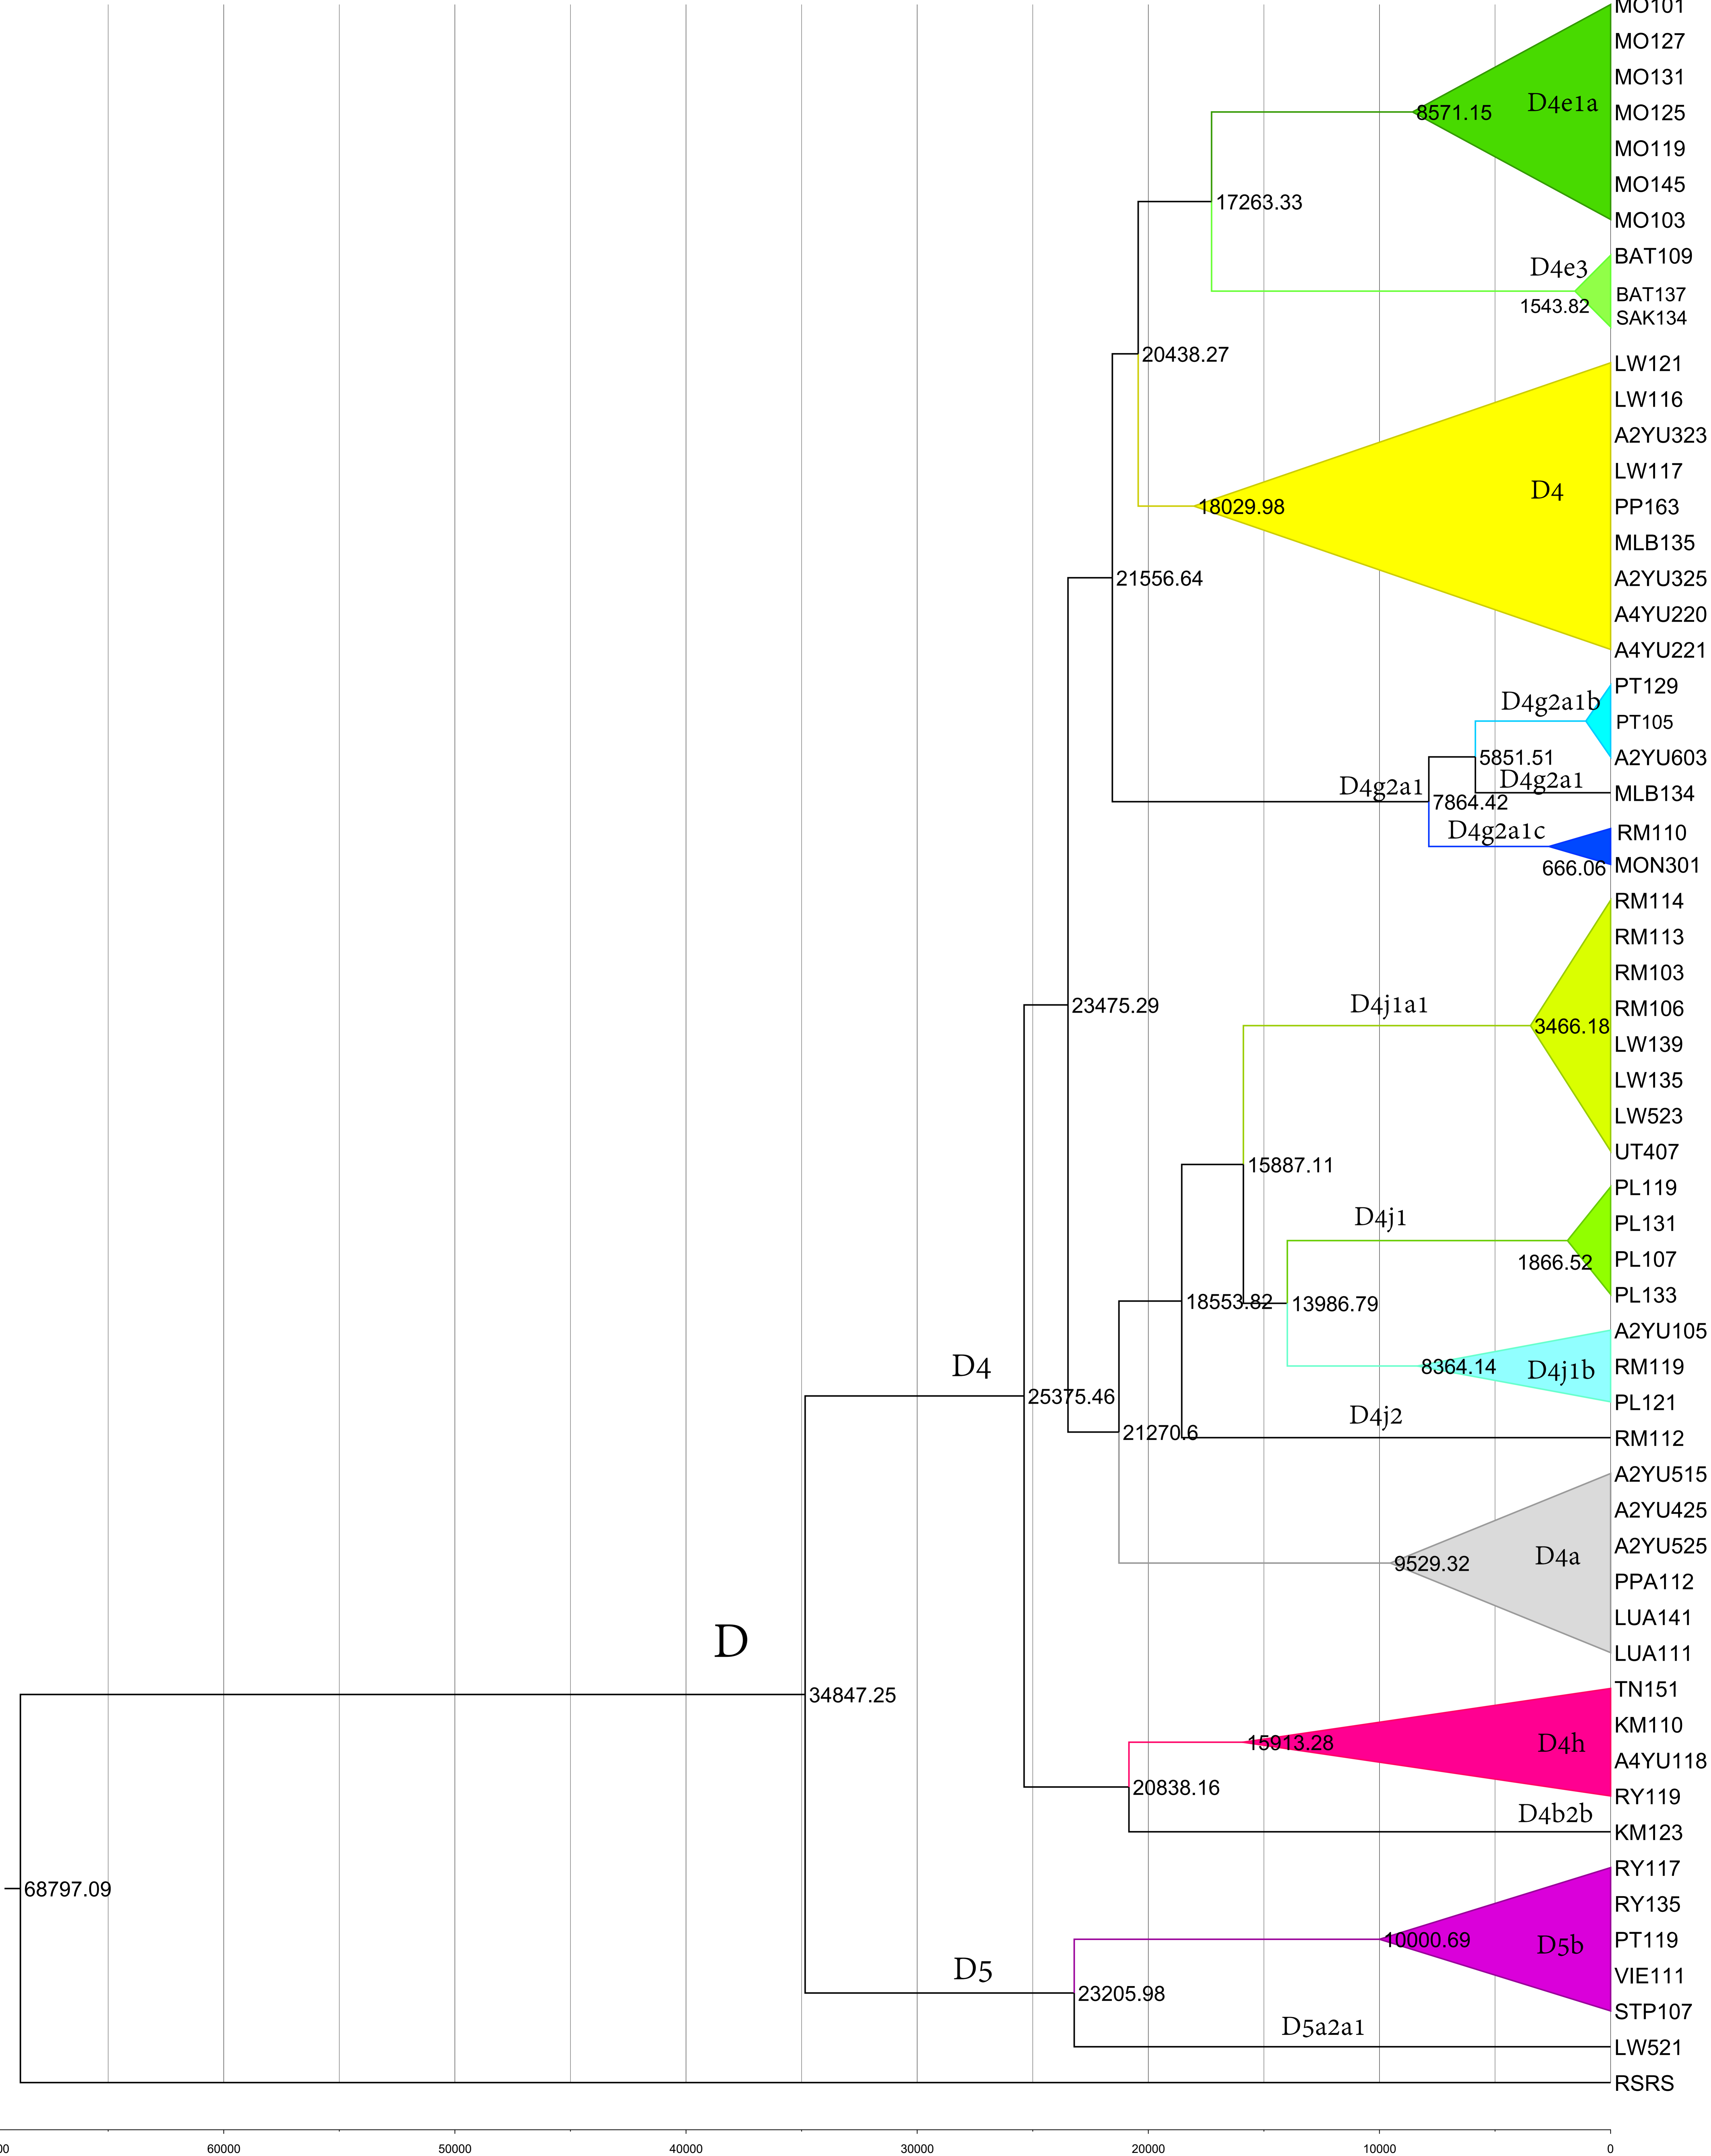

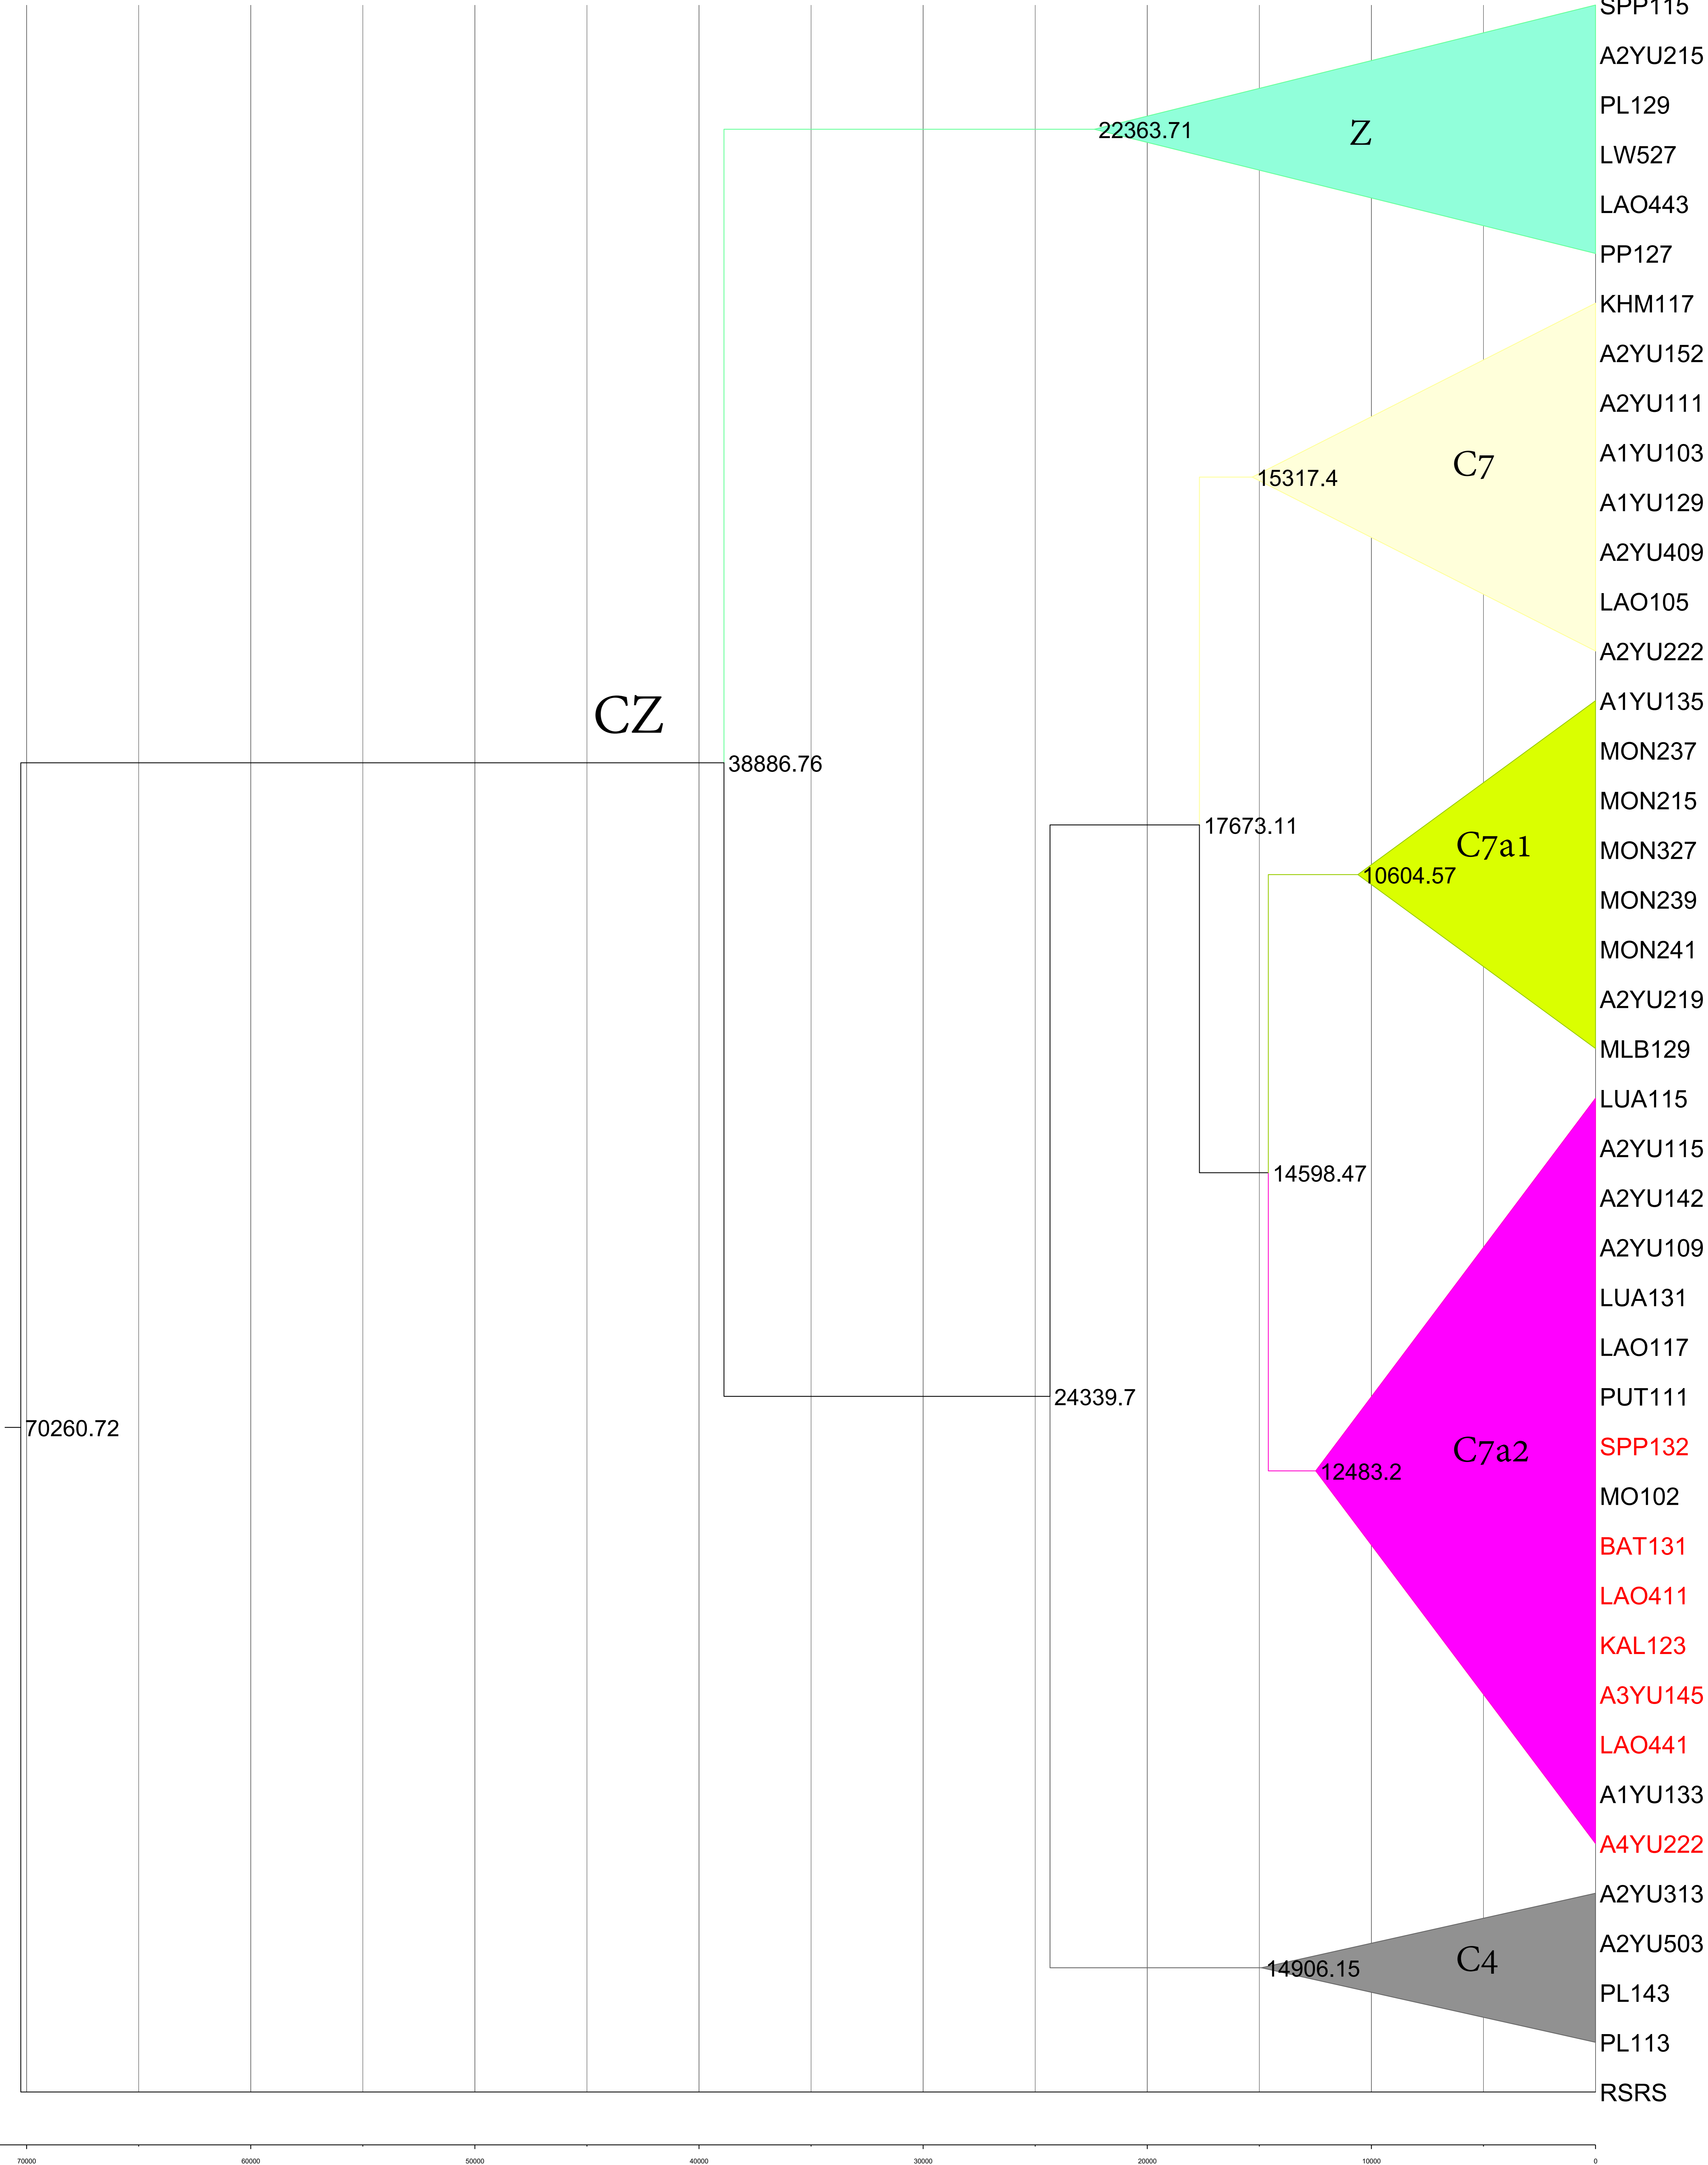

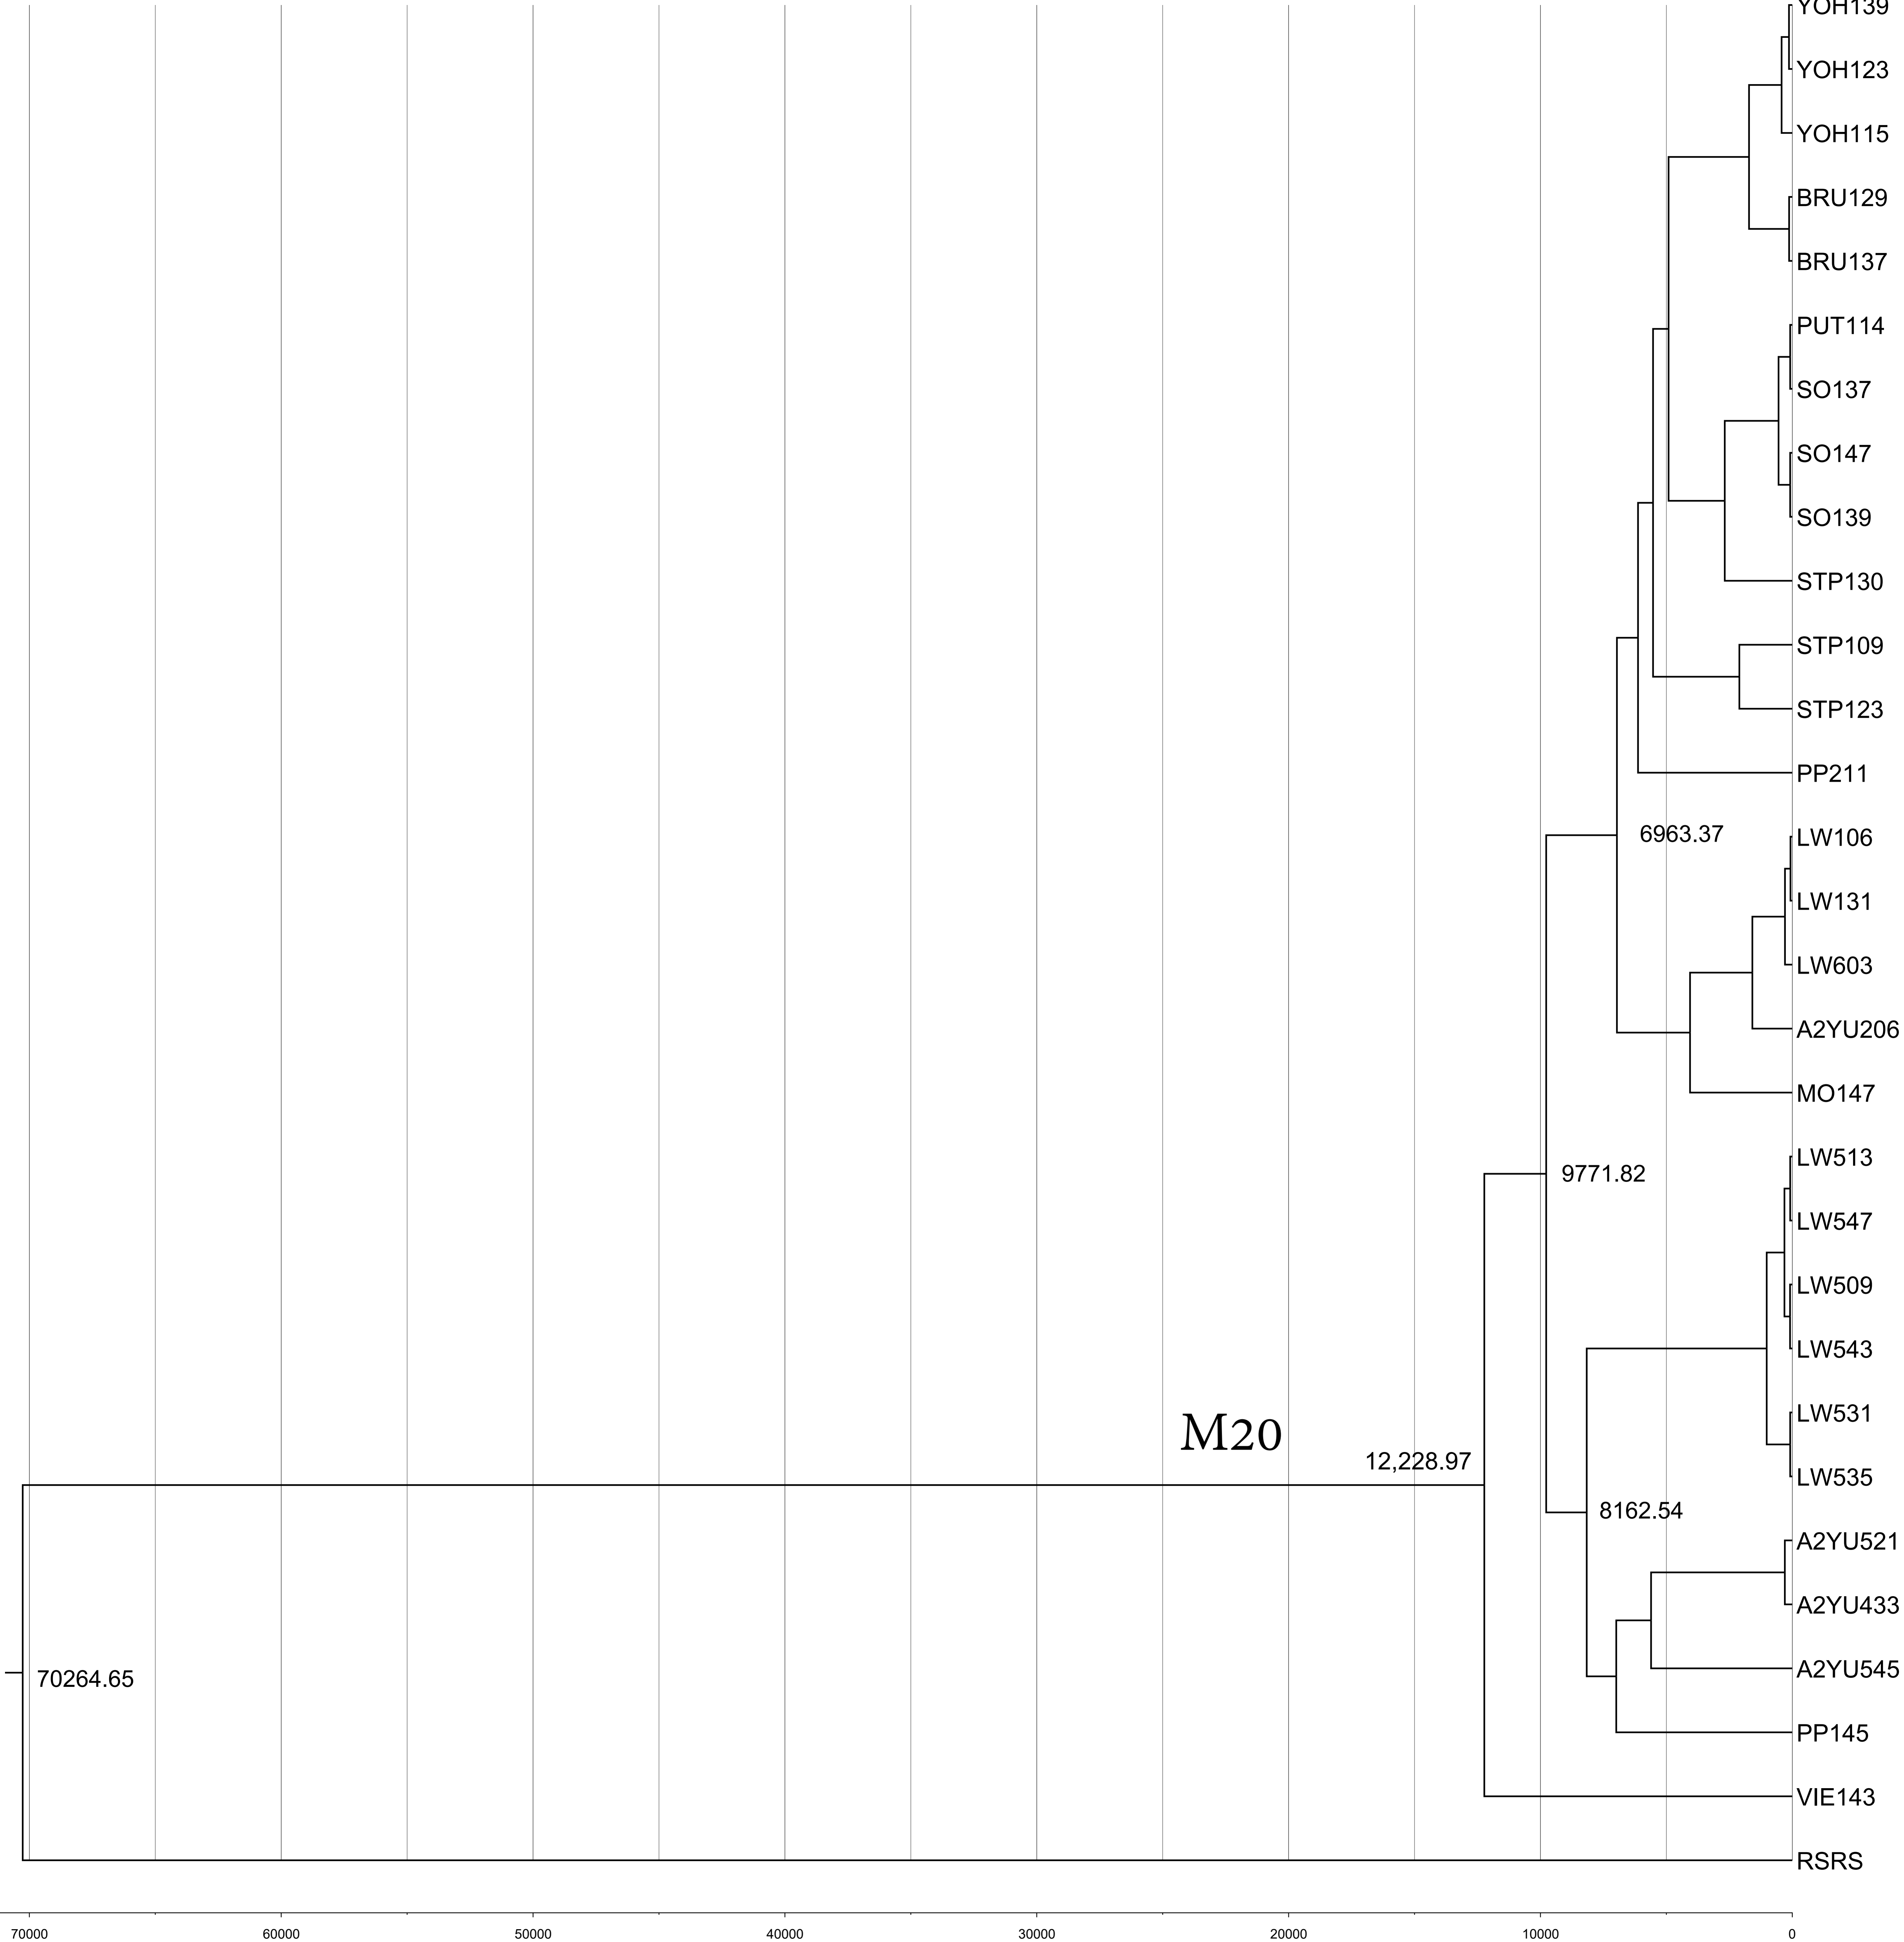

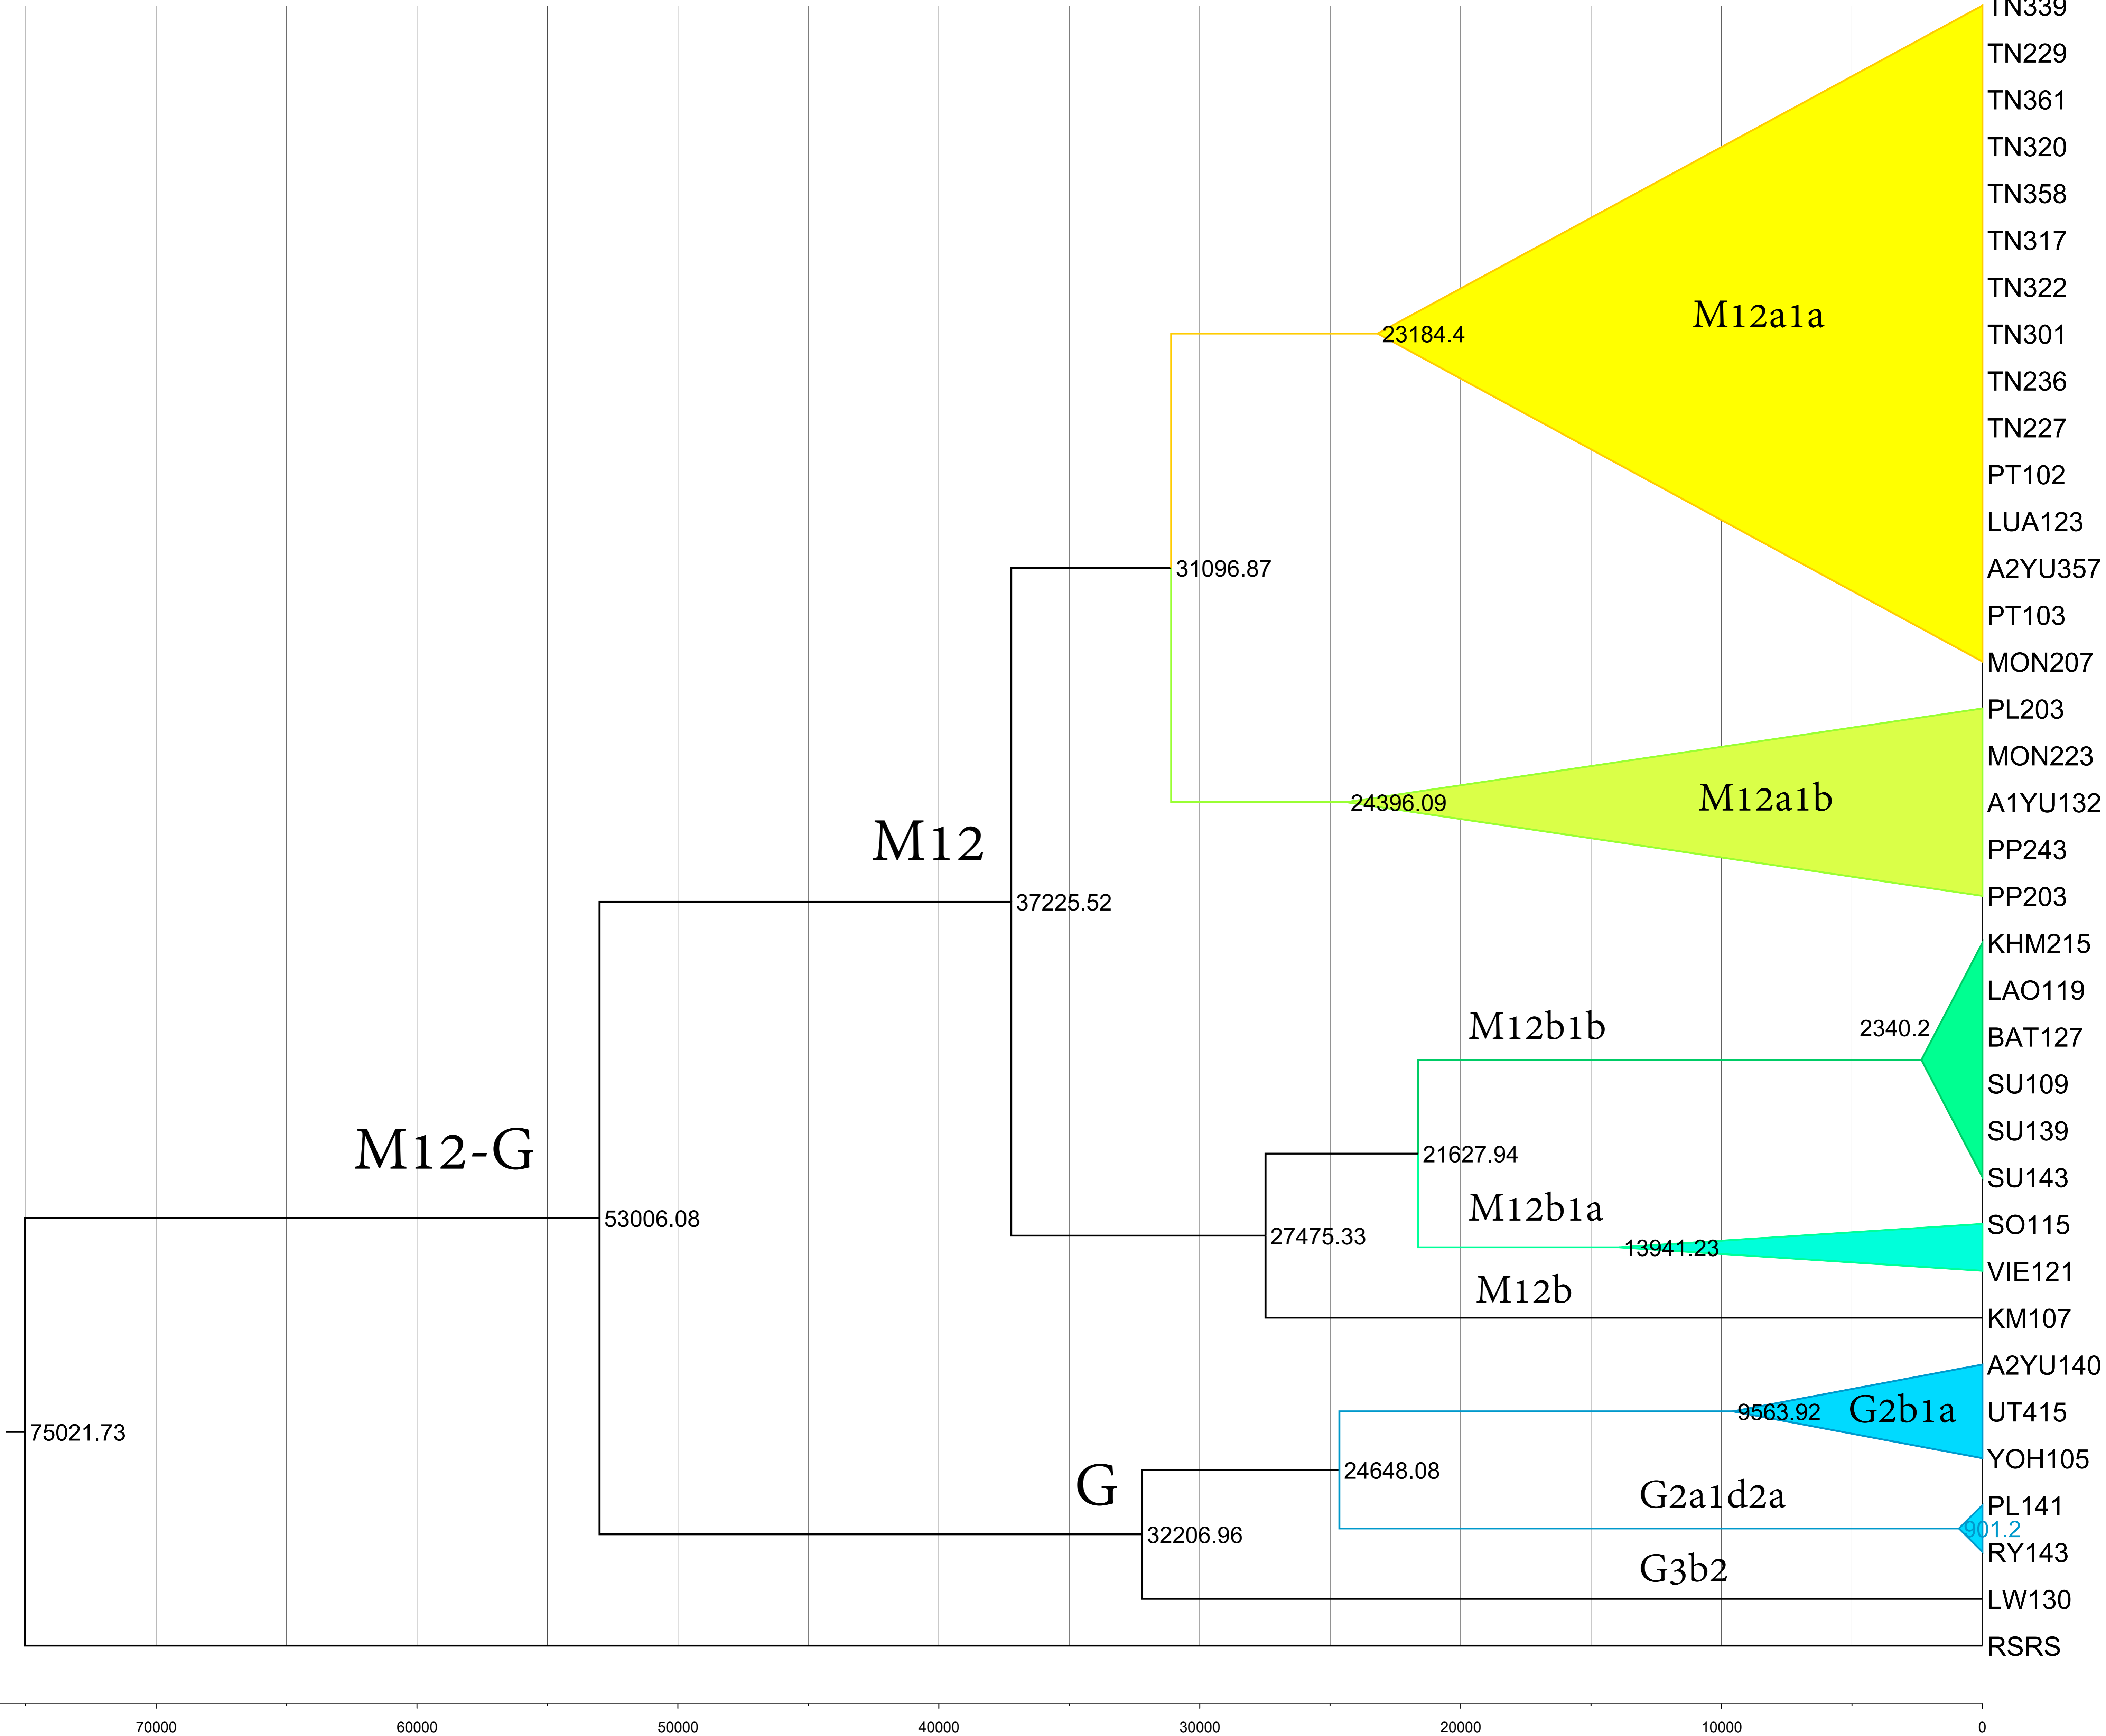

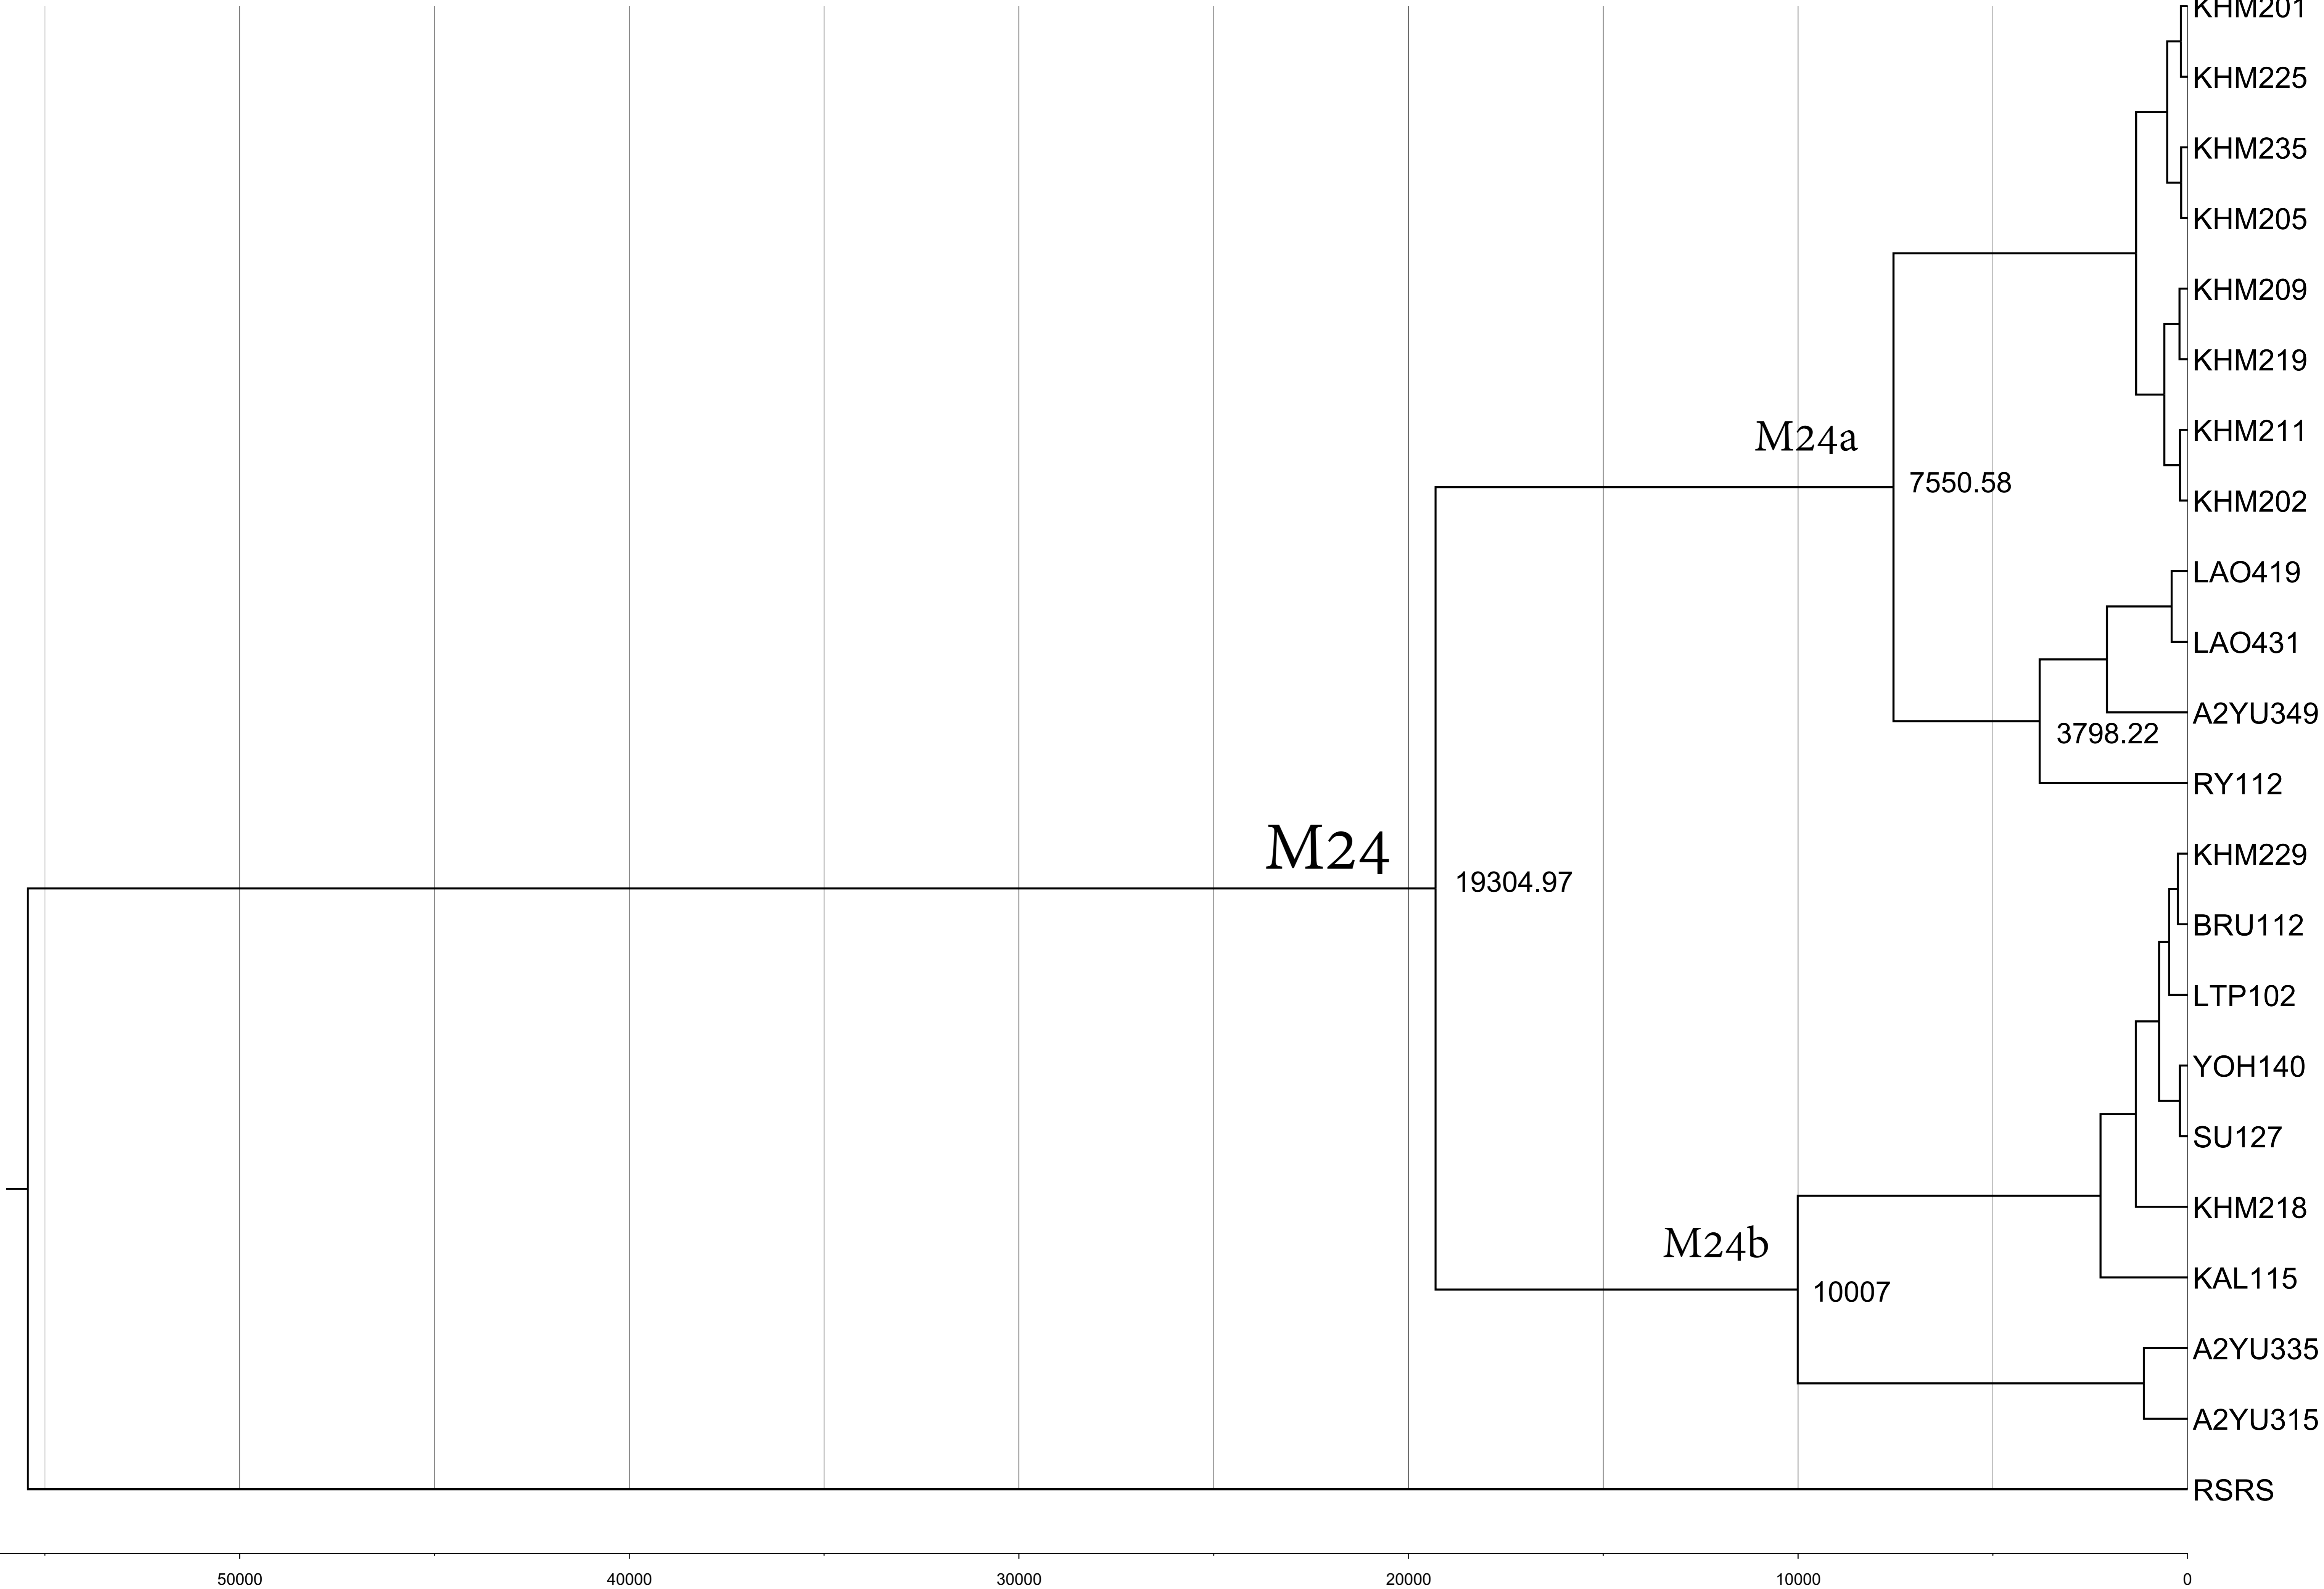

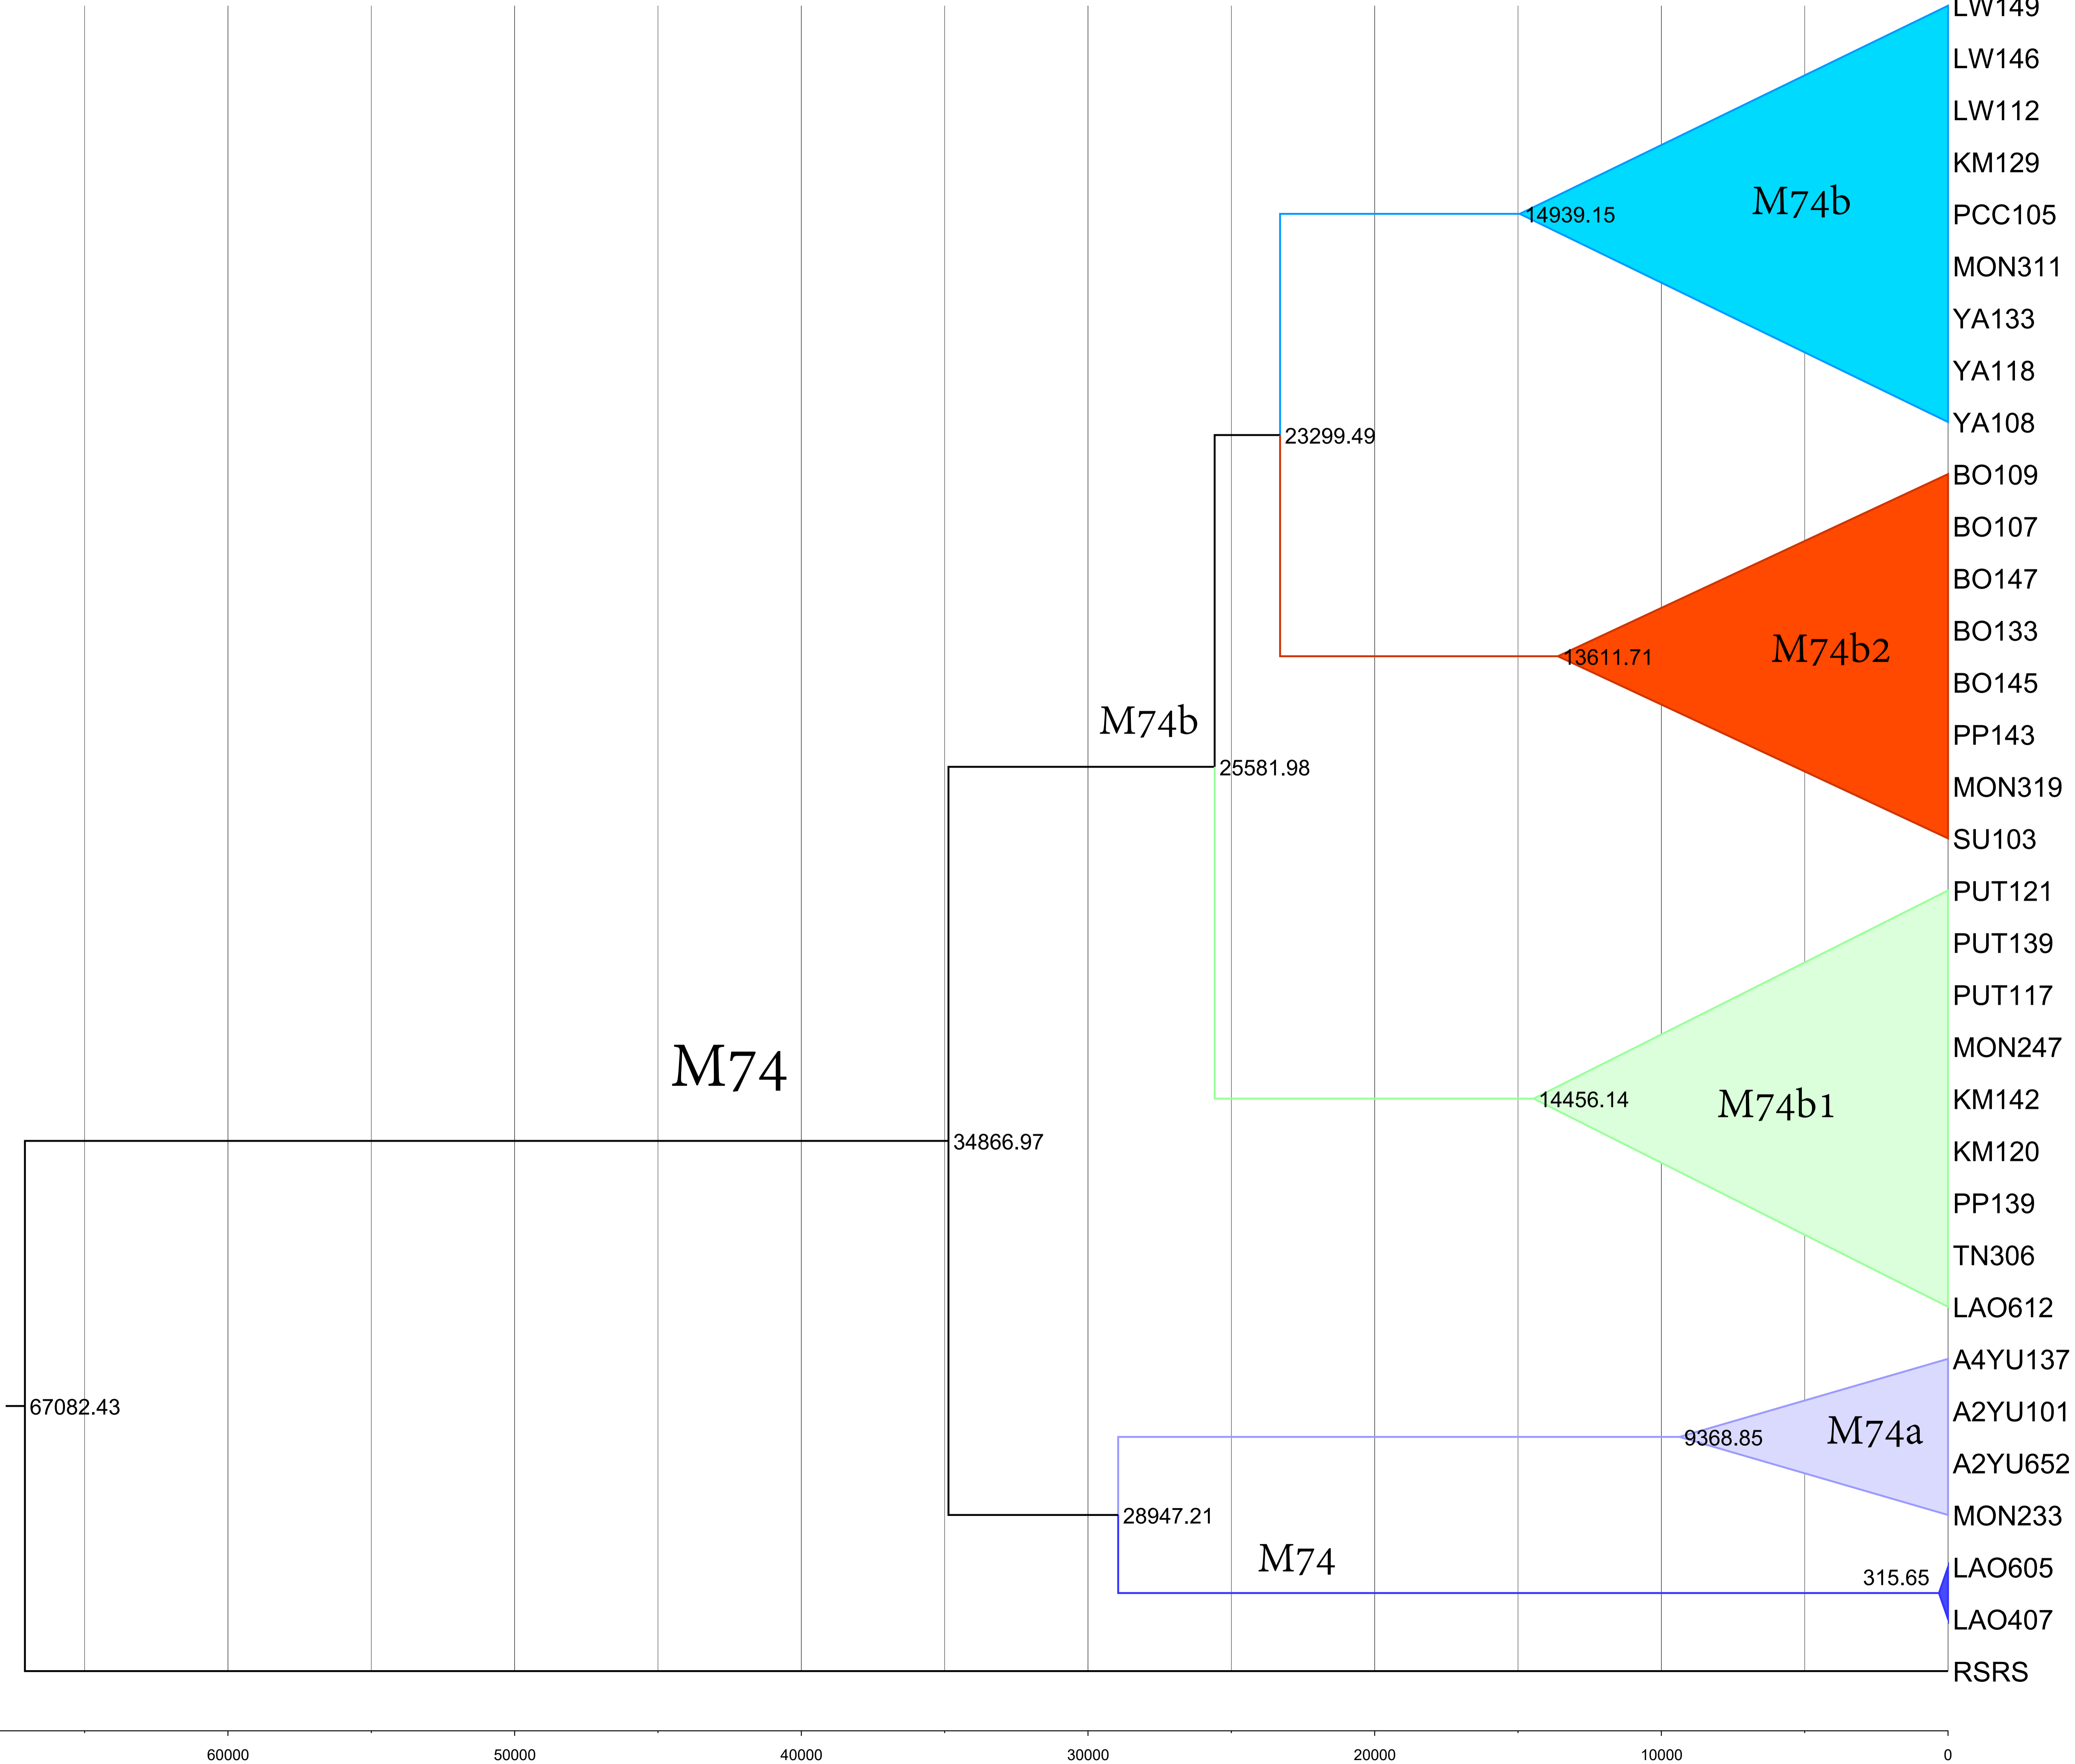

**Fig. S3** Bayesian maximum clade credibility (MCC) trees. MCC trees for 17 haplogroups (F1a, F1f, B5a, B4, B6a, R22, R9b, W3a1b, A, N9a, M7b1a, D, CZ, M20, M12-G, M24, and M74). Tree topology and coalescent time estimates were generated by BEAST and TreeAnnotator with parameters described in the Material and Methods. To aid visualization, some trees were schematically modified to combine individuals in the same lineage or sublineage by Figtree. Sample codes and RSRS are indicated at the tips of the tree.

F1a

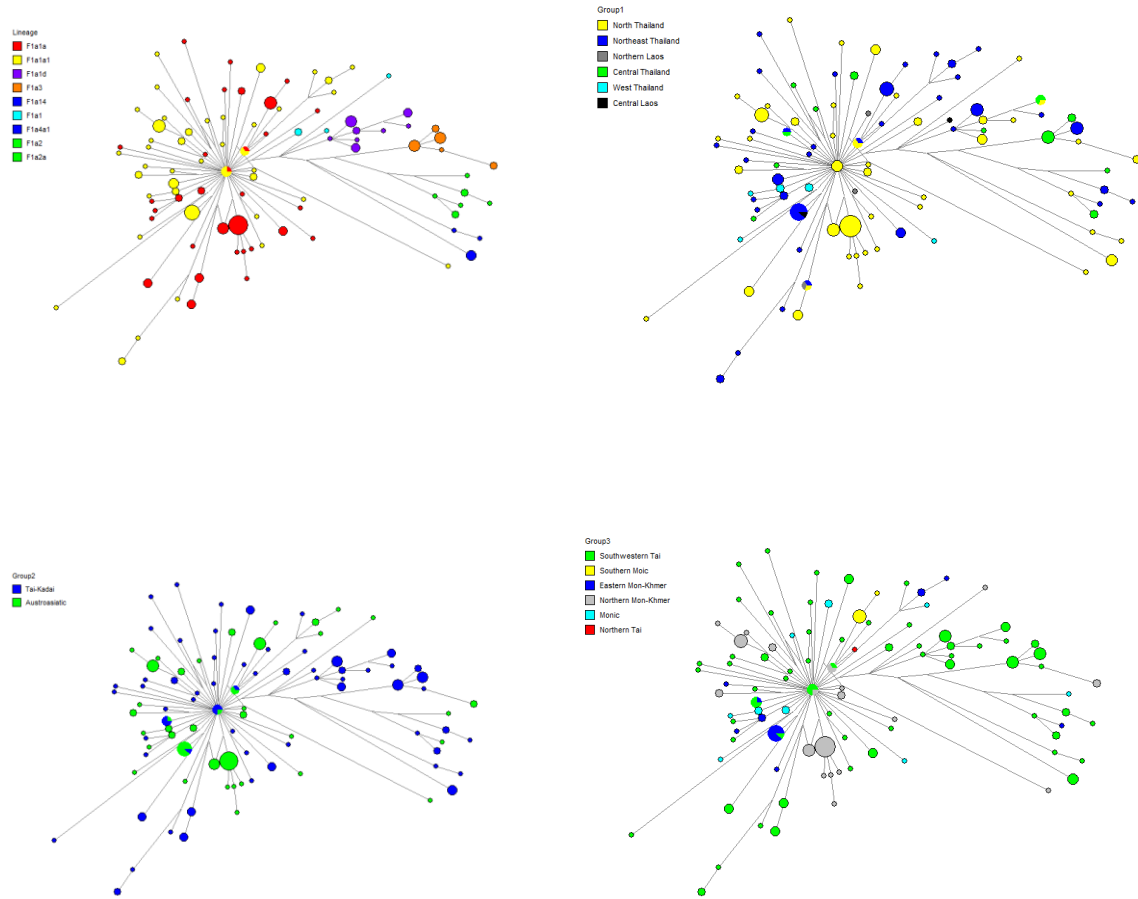

F1f

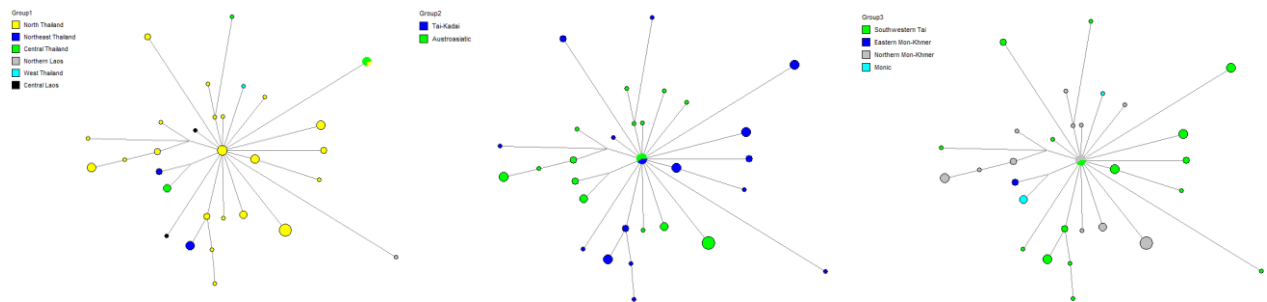

## B5a

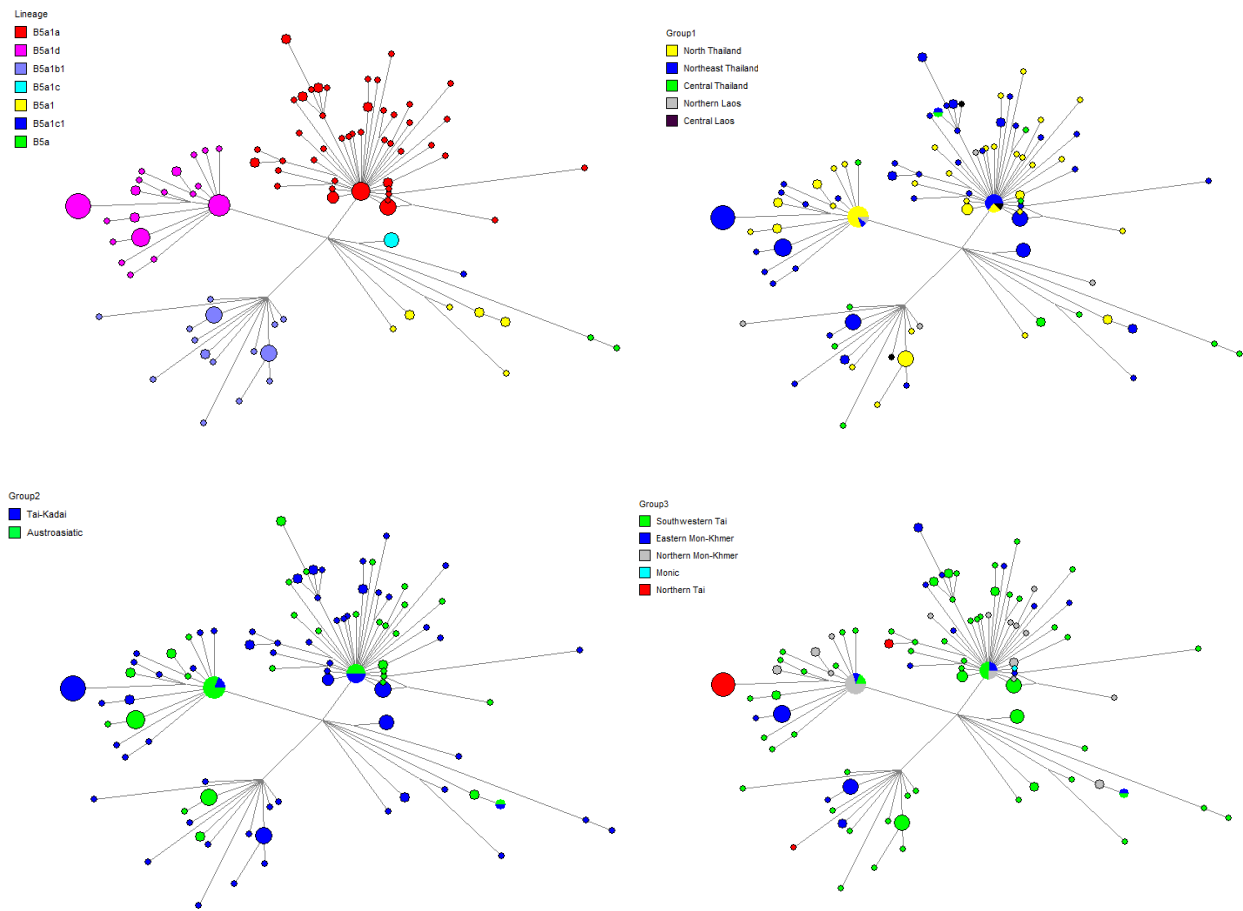

B4

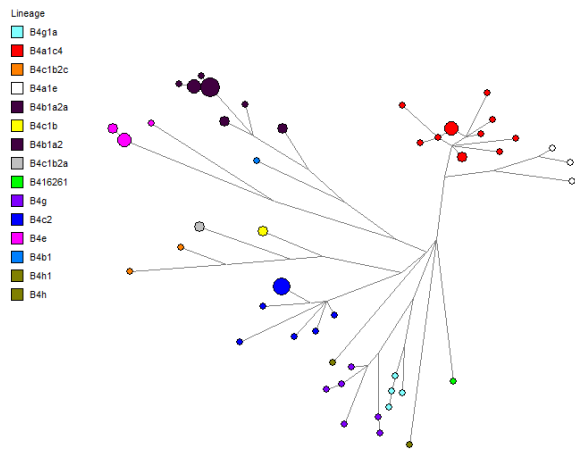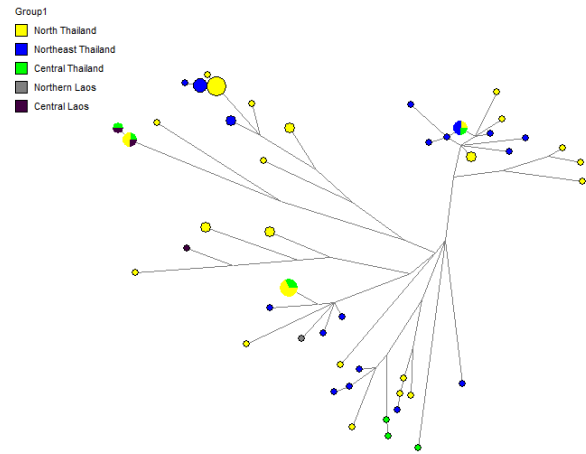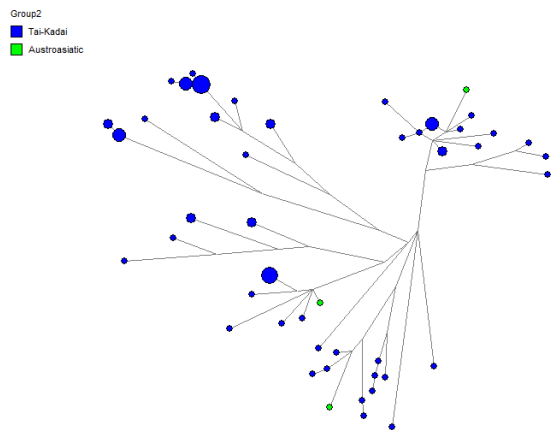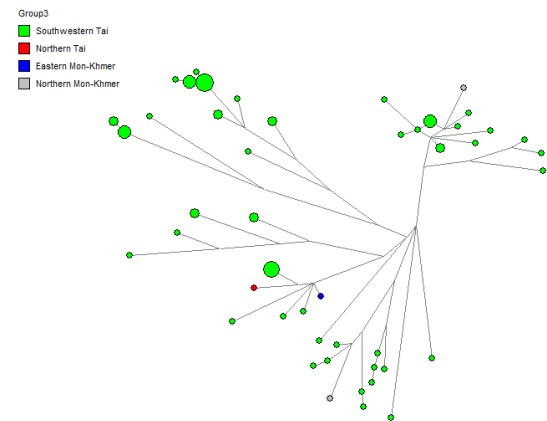

# M7

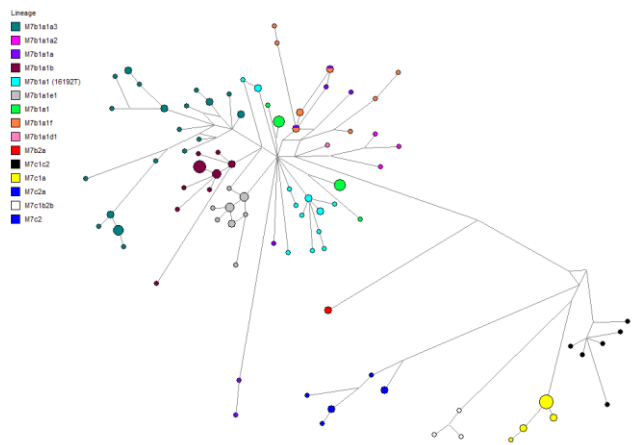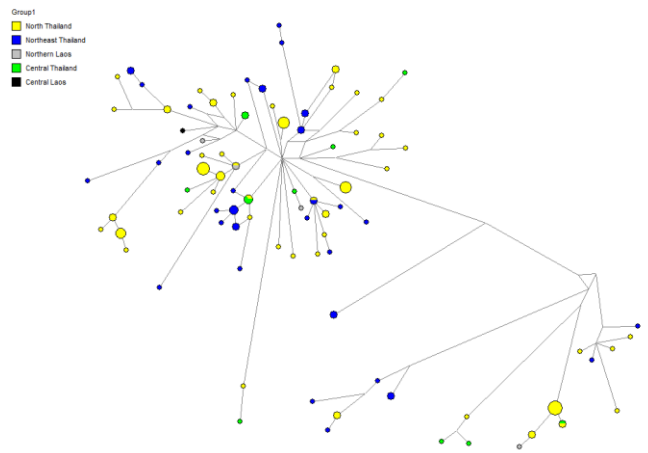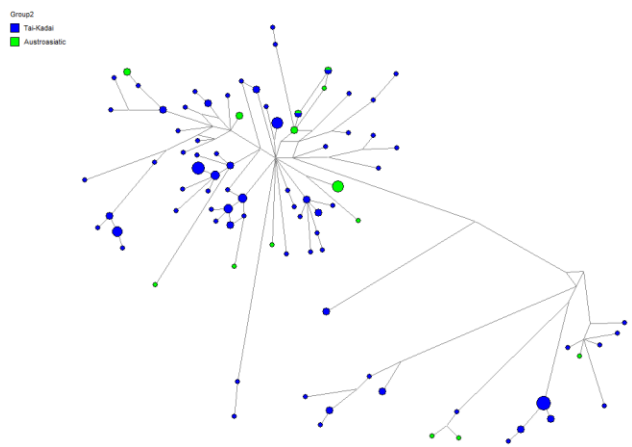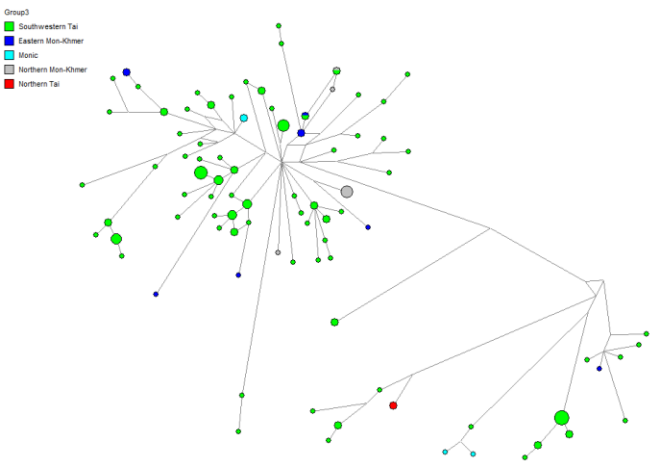

D

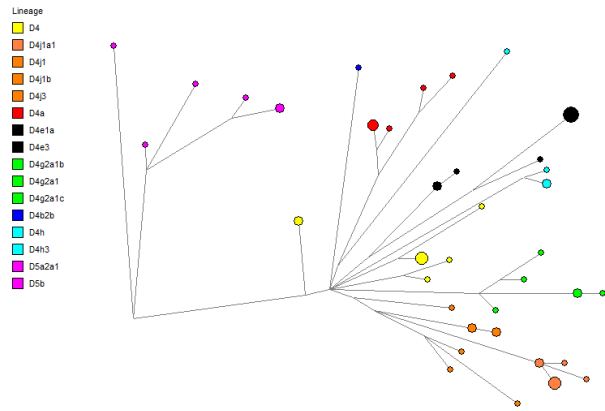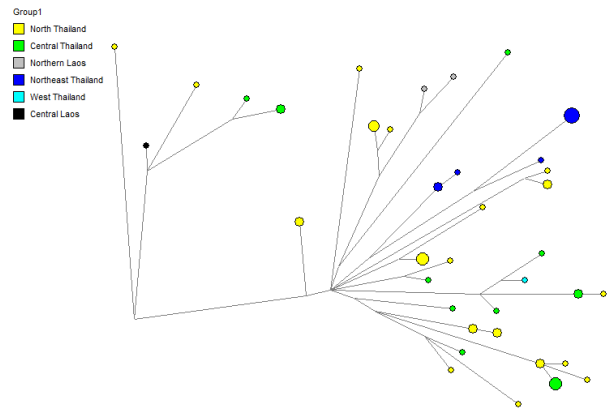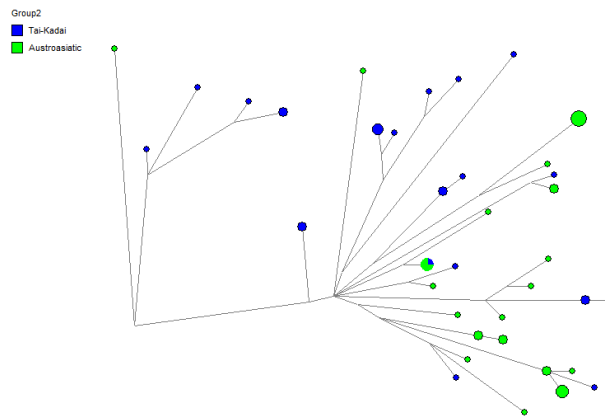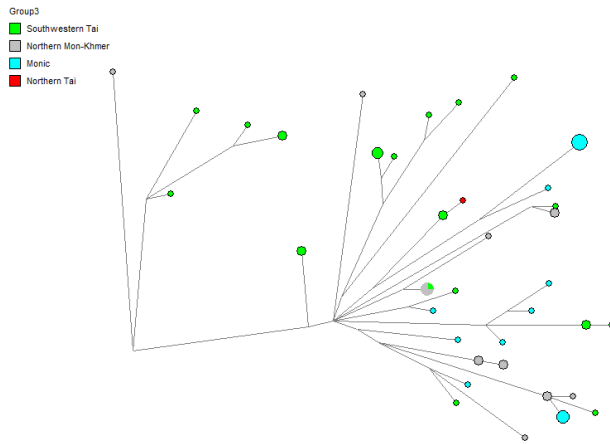

# M8

Lineage  
 C7a1  
 C7a1a  
 C7a2  
 C7a  
 C7  
 Z3a1a  
 Z3  
 Z3a  
 Z  
 Z4  
 M8a2a1

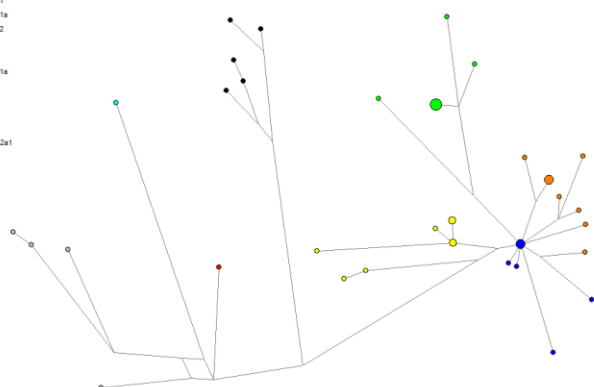

Group1  
 North Thailand  
 Central Thailand  
 West Thailand  
 Northeast Thailand  
 Northern Laos

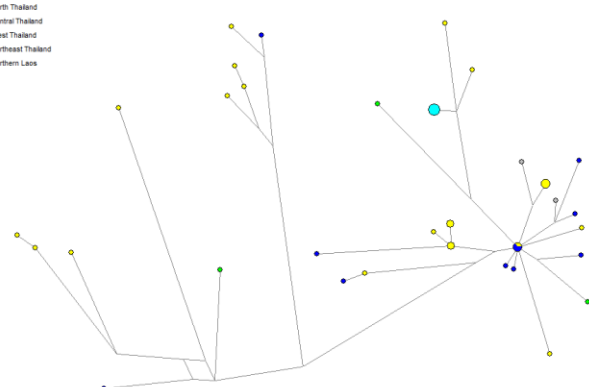

Group2  
 Tai-Kadai  
 Austroasiatic

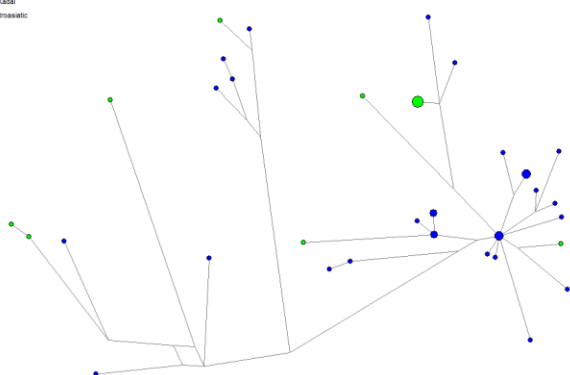

Group3  
 Southwestern Tai  
 Monic  
 Eastern Mon-Khmer  
 Northern Mon-Khmer  
 Northern Tai

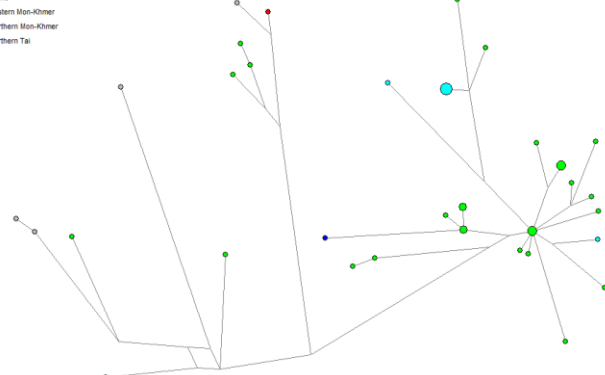

M12-G

Lineage

- G2b1a1
- G2b2
- G2a1d2a
- G2b1a
- M12a1a
- M12a1b

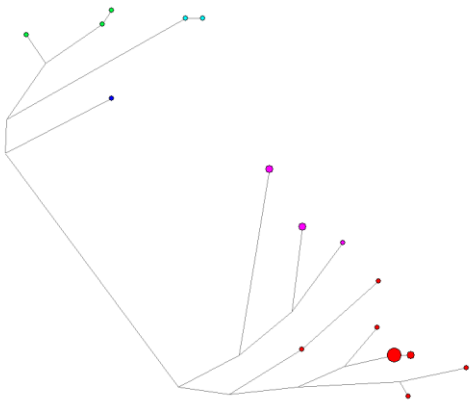

Group1

- North Thailand
- Central Thailand
- Northeast Thailand
- Northern Laos
- West Thailand

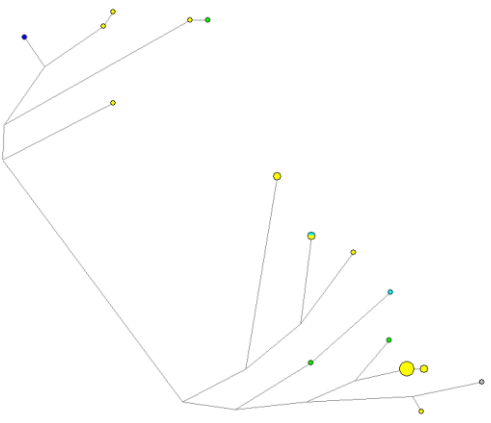

Group2

- Tai-Kadai
- Austroasiatic

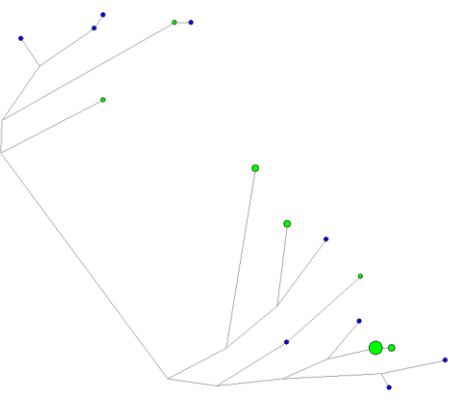

Group3

- Southwestern Tai
- Northern Mon-Khmer
- Monic

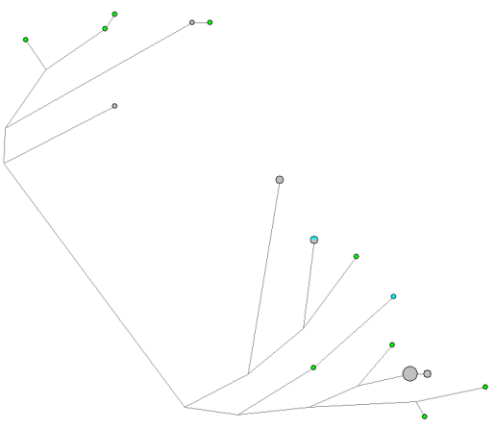

M20

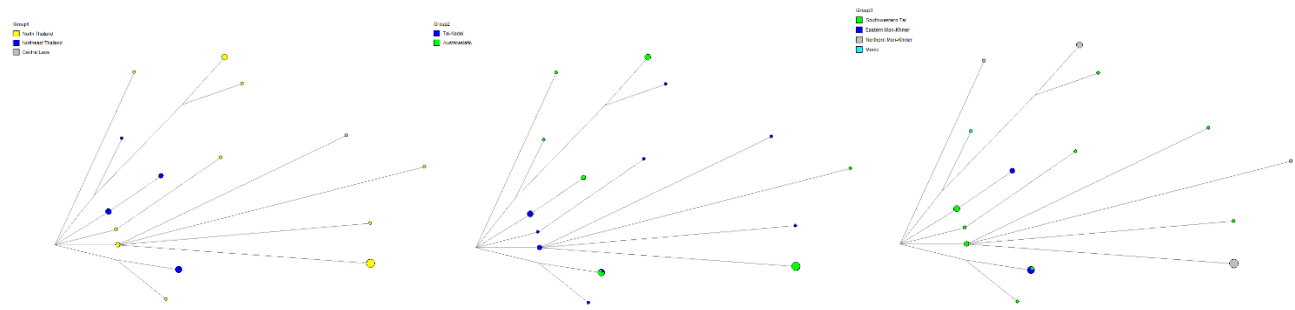

M24

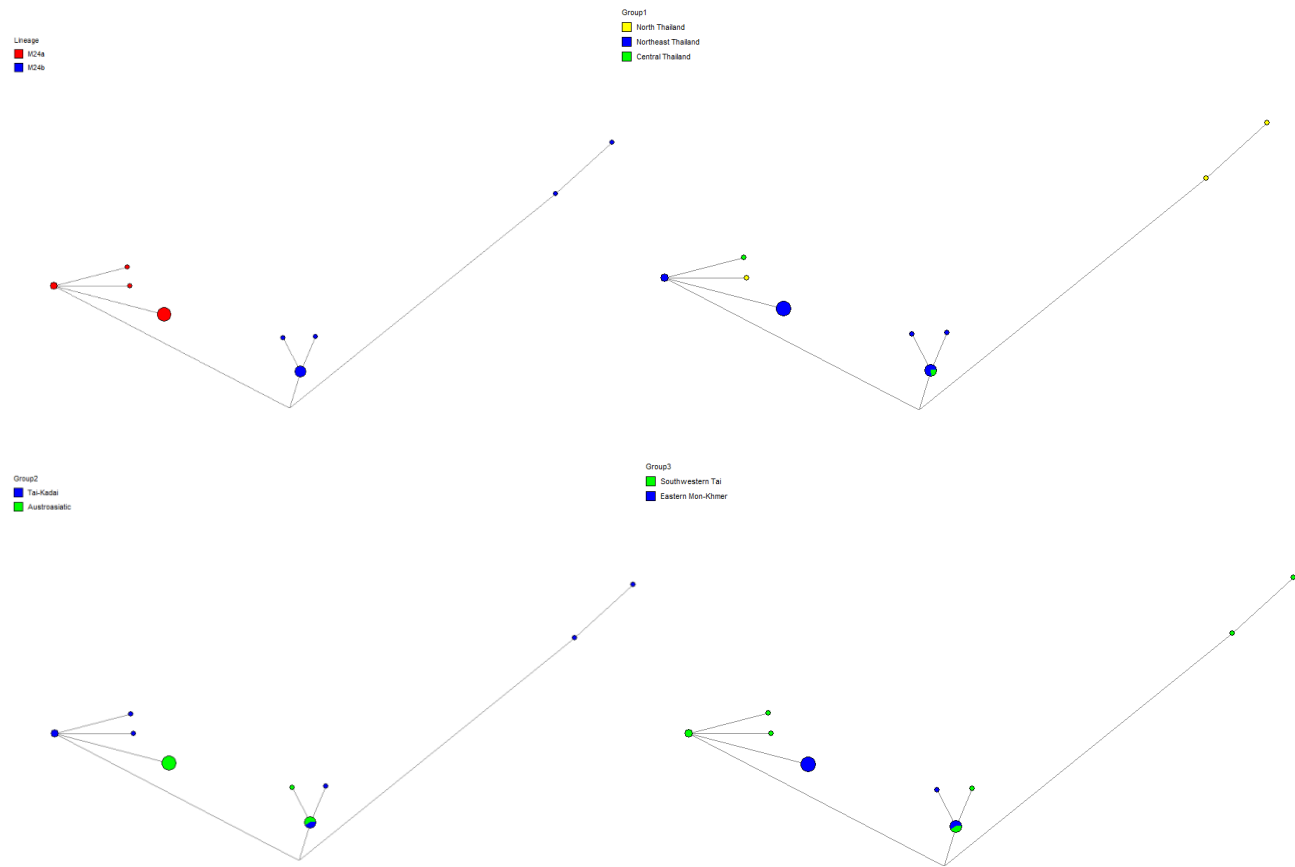

# M74

Lineage  
M74a  
M74b2  
M74b1  
M74b  
M74

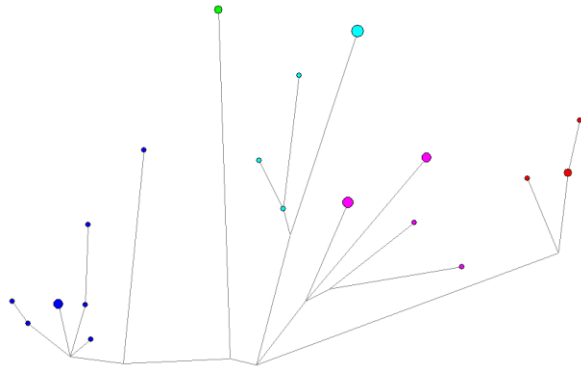

Group1  
North Thailand  
Northeast Thailand  
West Thailand

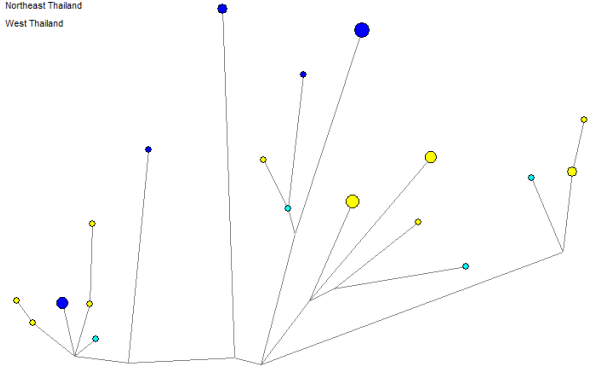

Group2  
Tai-Kadai  
Austroasiatic

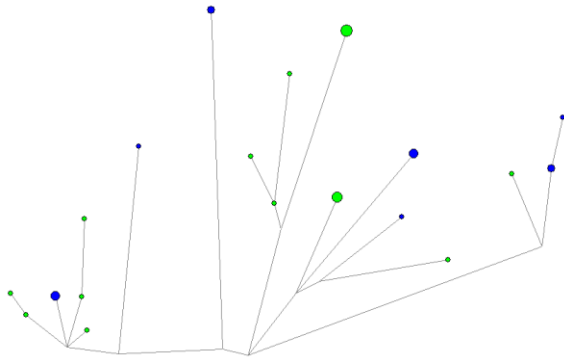

Group3  
Southwestern Tai  
Southern Monic  
Northern Mon-Khmer  
Monic  
Eastern Mon-Khmer

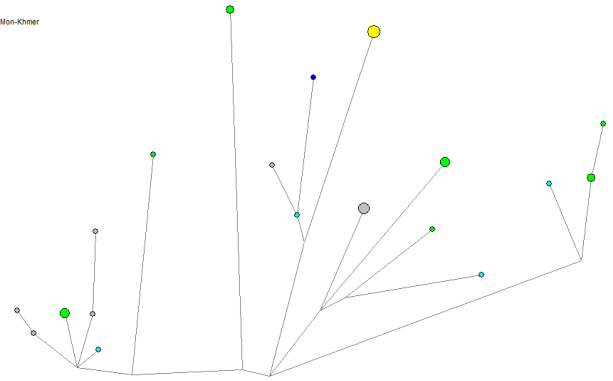

R9b

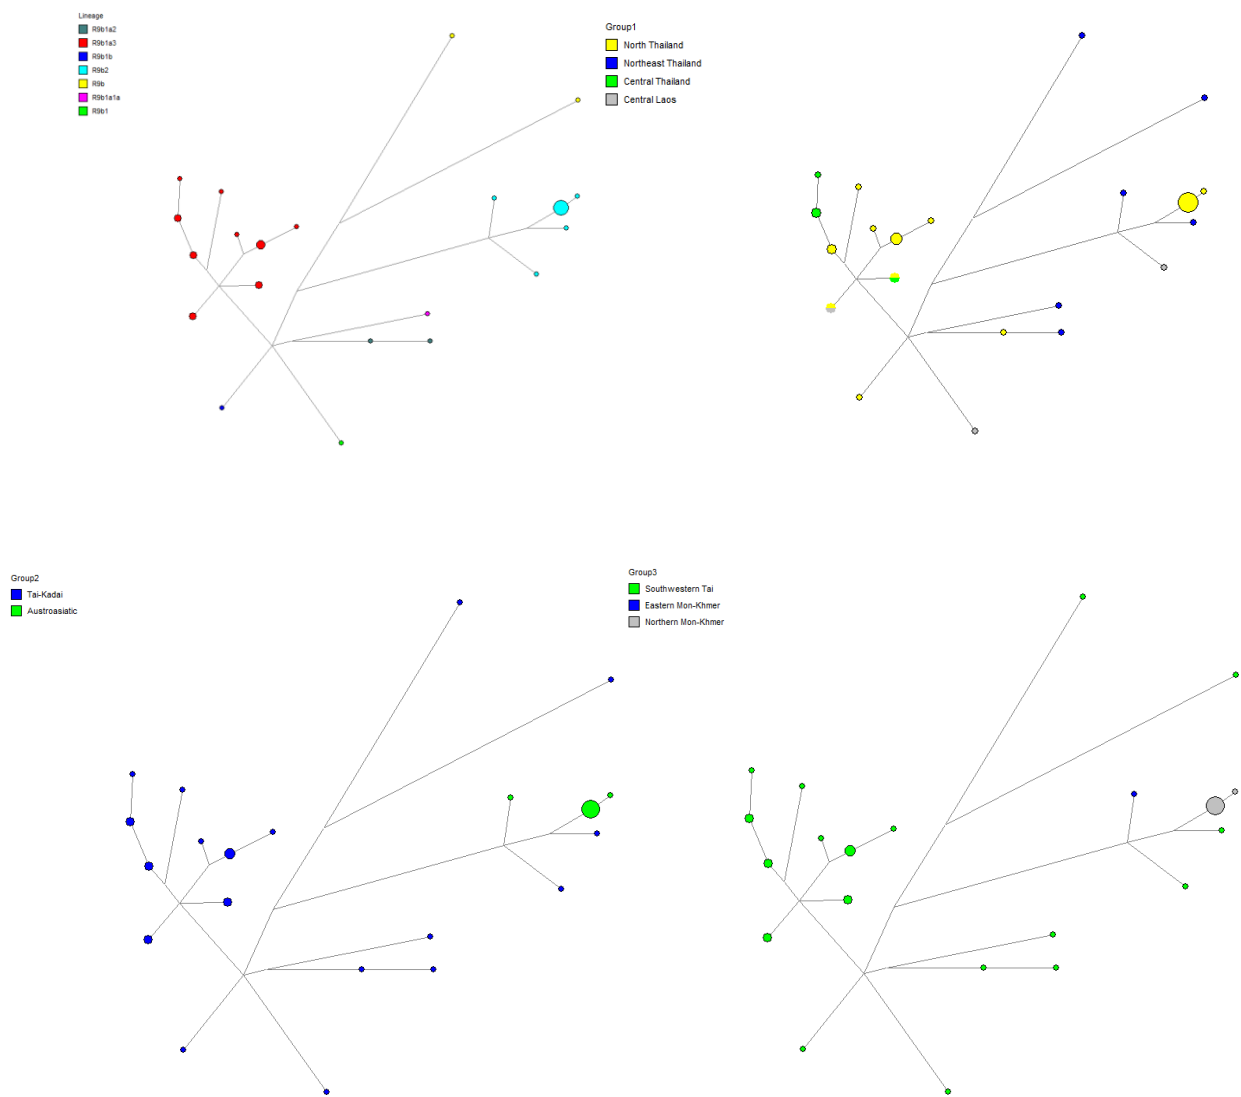

R22

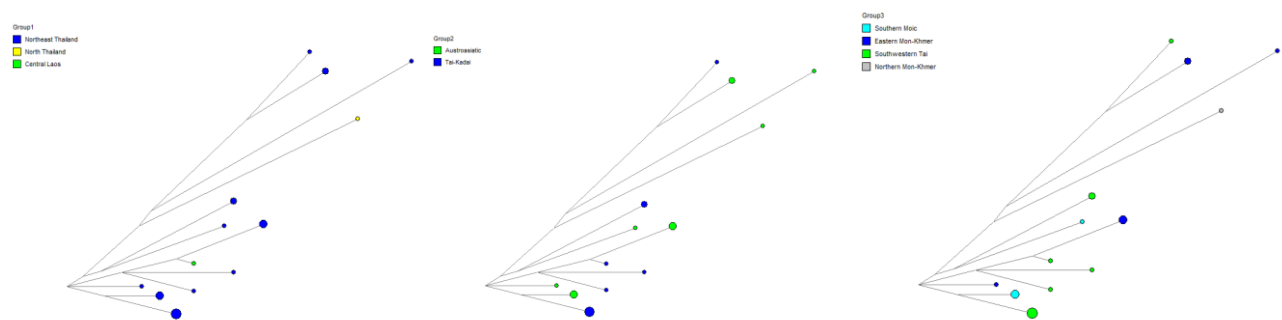

# N9a

Lineage

- N9a6
- N9a10 (16311C)
- N9a
- N9a10
- N9a1
- N9a2 4 5
- N9a3

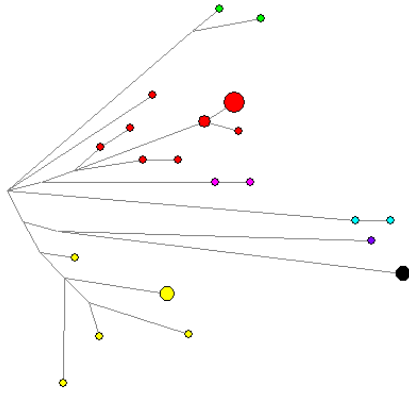

Group1

- North Thailand
- Central Thailand
- Northeast Thailand
- Northern Laos
- West Thailand

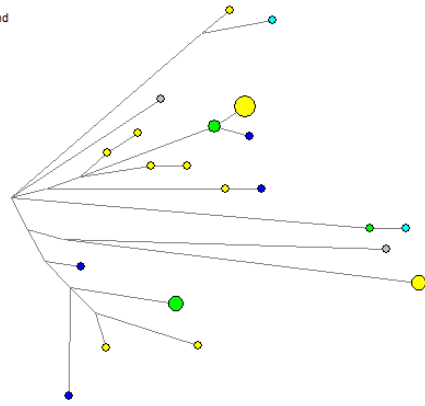

Group2

- Tai-Kadai
- Austroasiatic

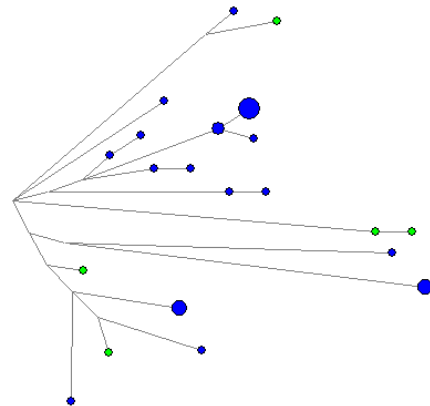

Group3

- Southwestern Tai
- Northern Mon-Khmer
- Eastern Mon-Khmer
- Monic

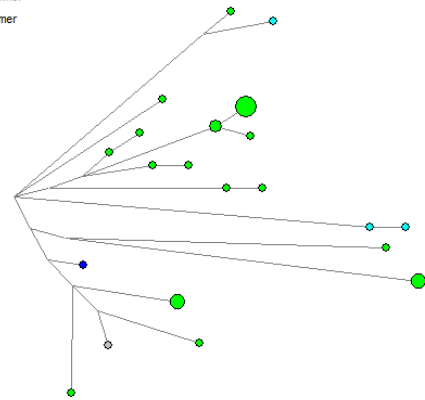

B4c2

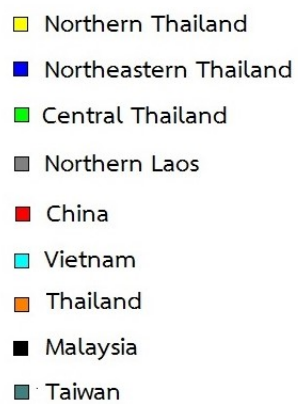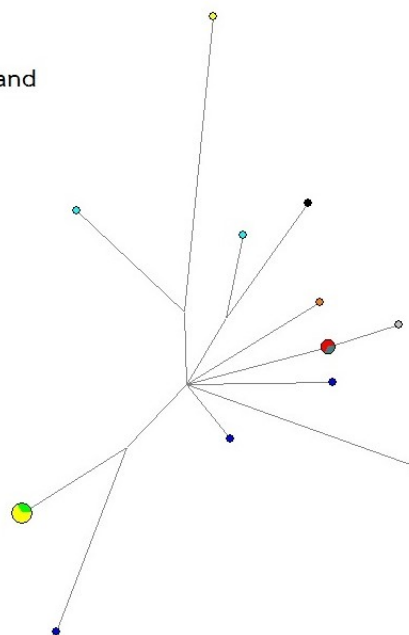

B6a

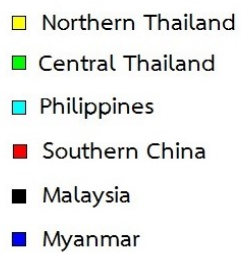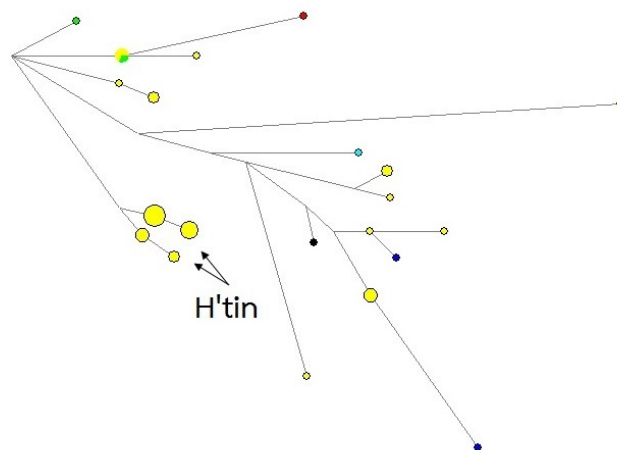

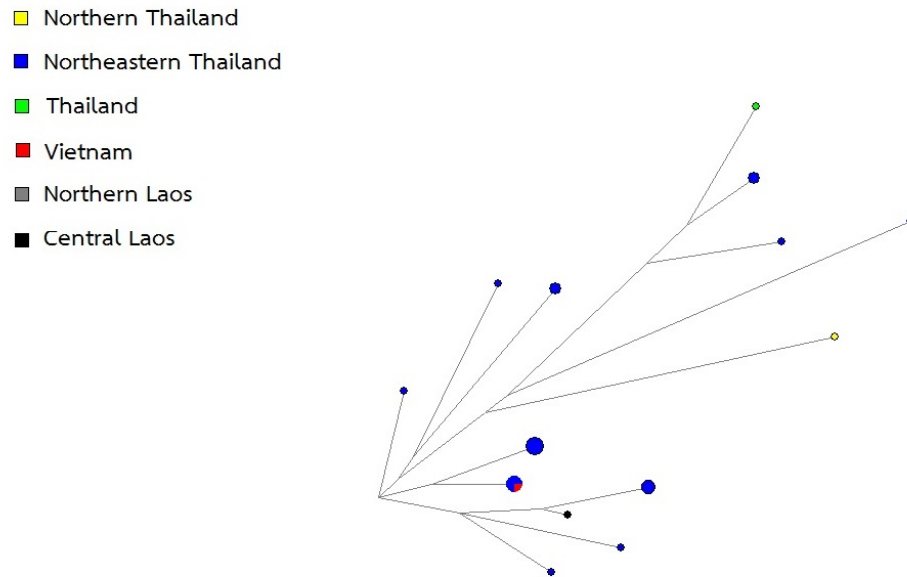

**Fig. S4** Networks of 14 major haplogroups (F1a, F1f, B5a, B4, M7, D, M8, M12-G, M20, M24, M74, R9b, R22 and N9a) based on Thai/Lao mtDNA genomes and three haplogroups (B4c2, B6a and R22) based on sequences in Thai/Lao populations and other East Asian populations. Networks were generated by the program Network and post-processed by Network Publisher. The networks were colored variously according to lineages, geographic regions and languages. Geographic and linguistic classifications are as in the AMOVA analysis (Table 1).

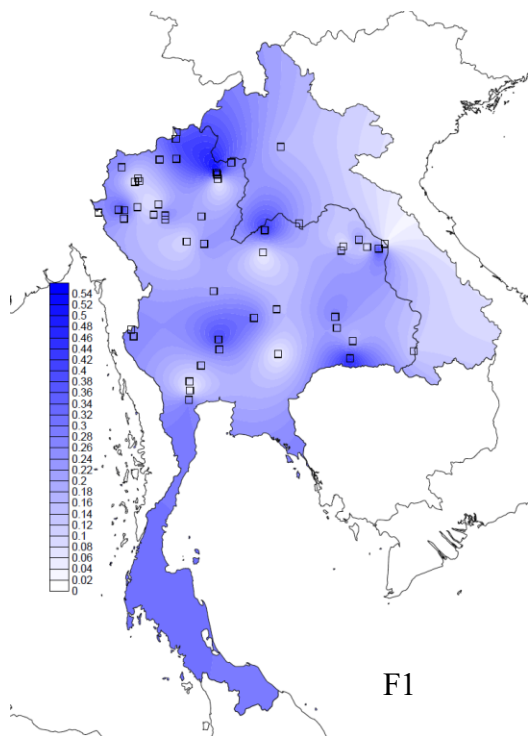

F1

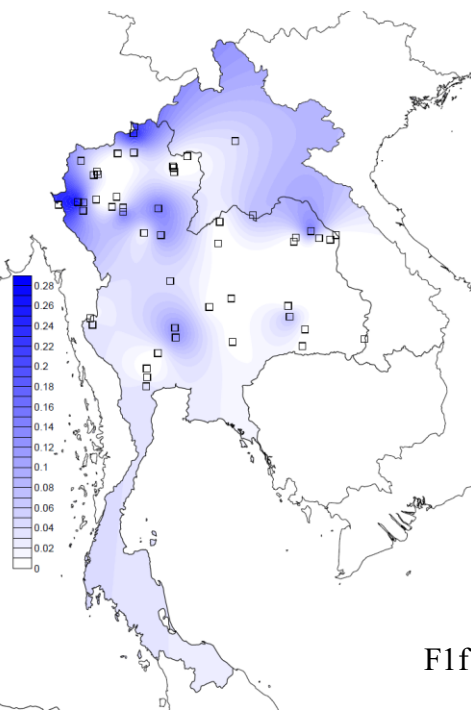

F1f

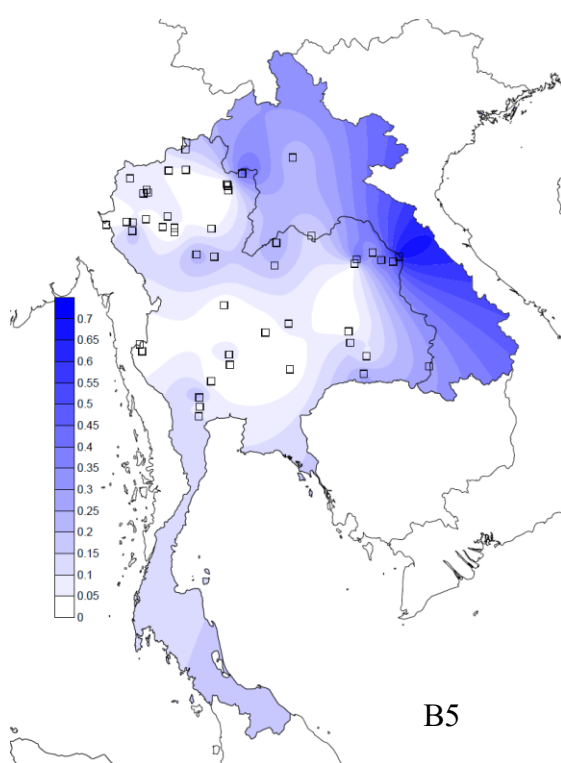

B5

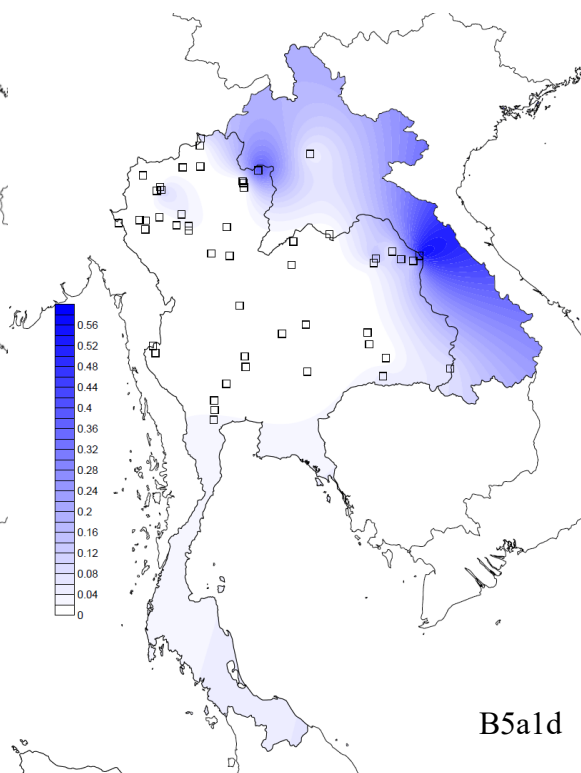

B5ald

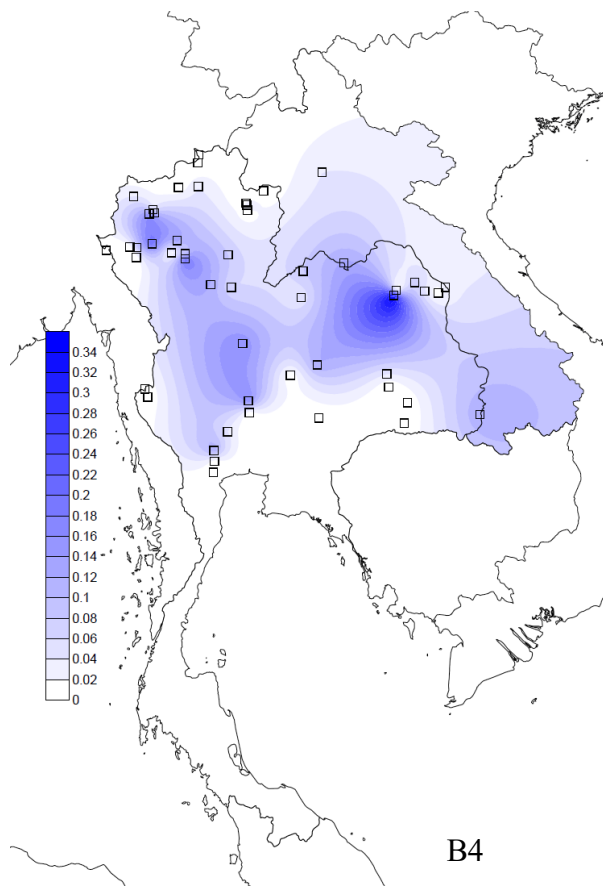

B4

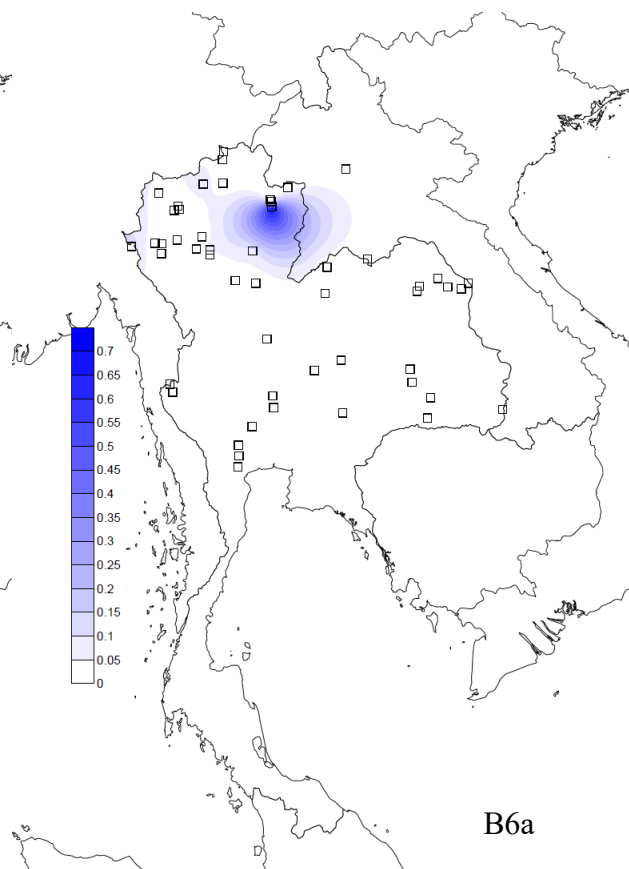

B6a

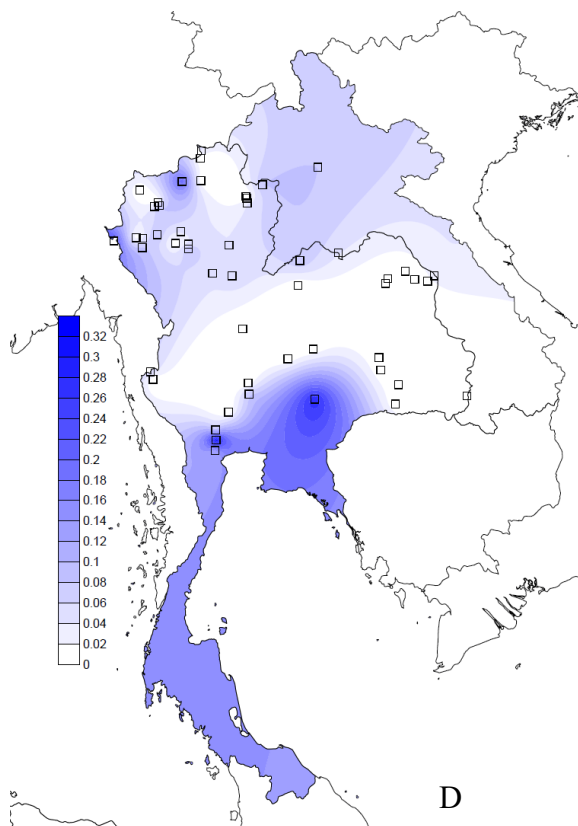

D

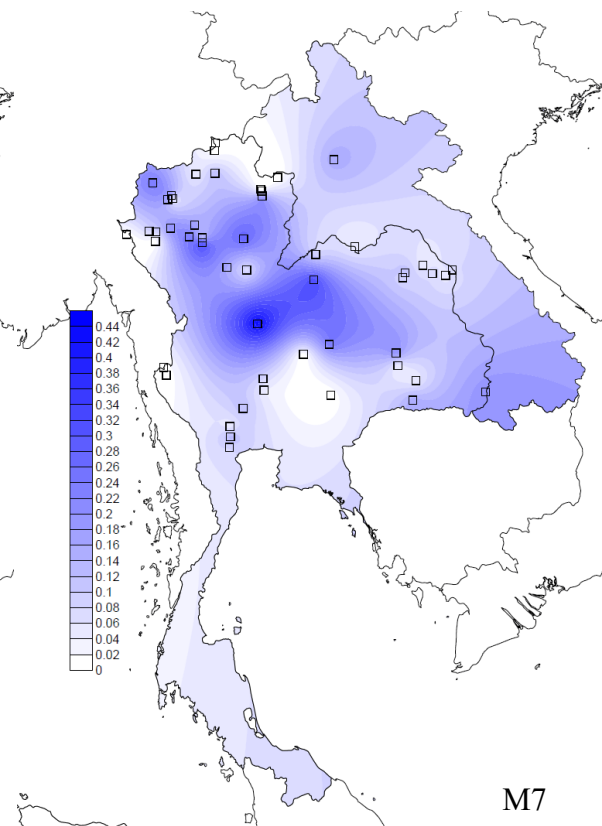

M7

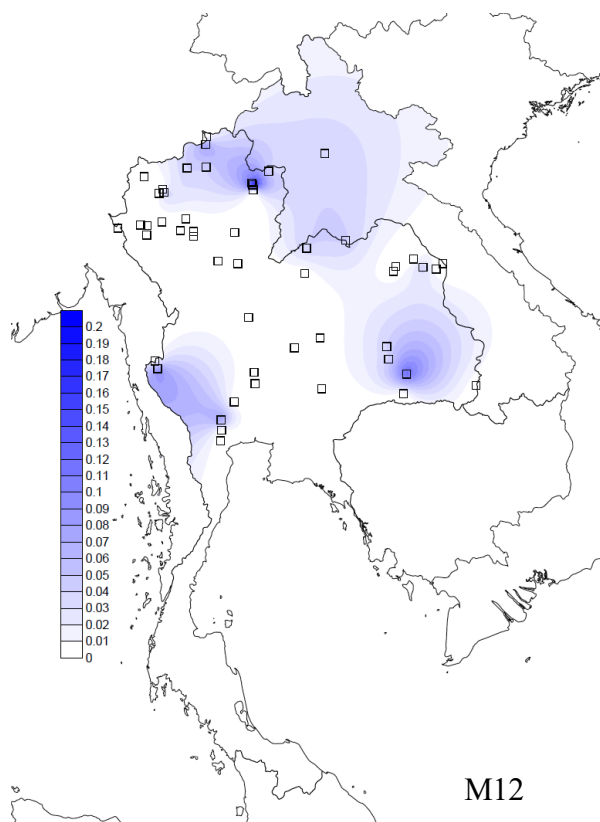

M12

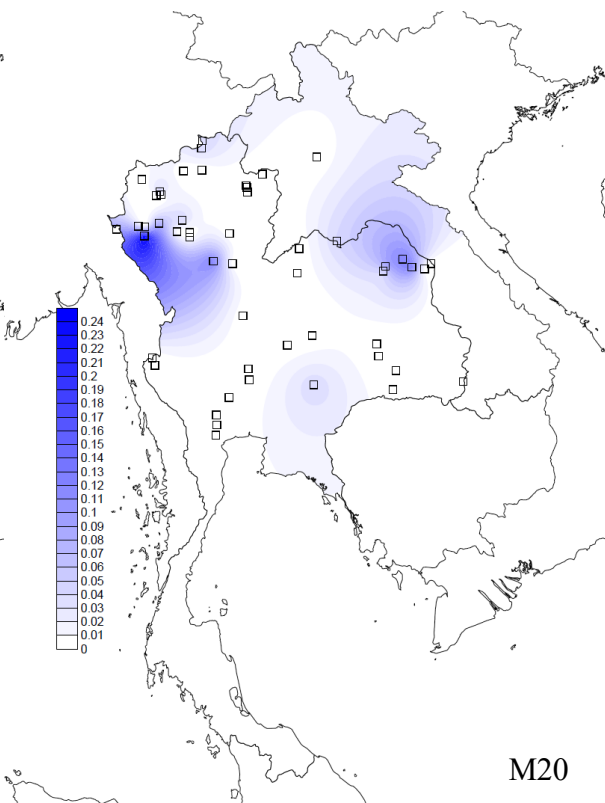

M20

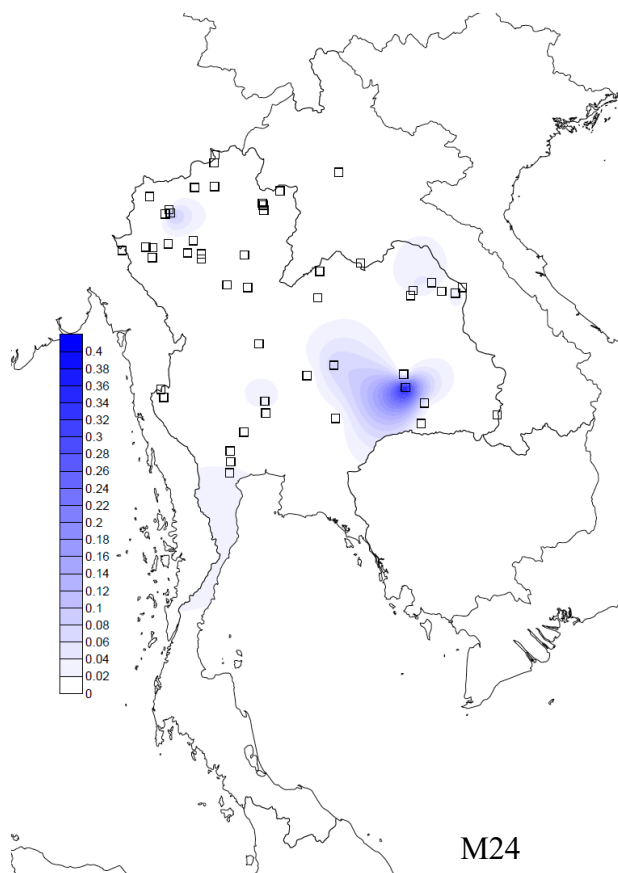

M24

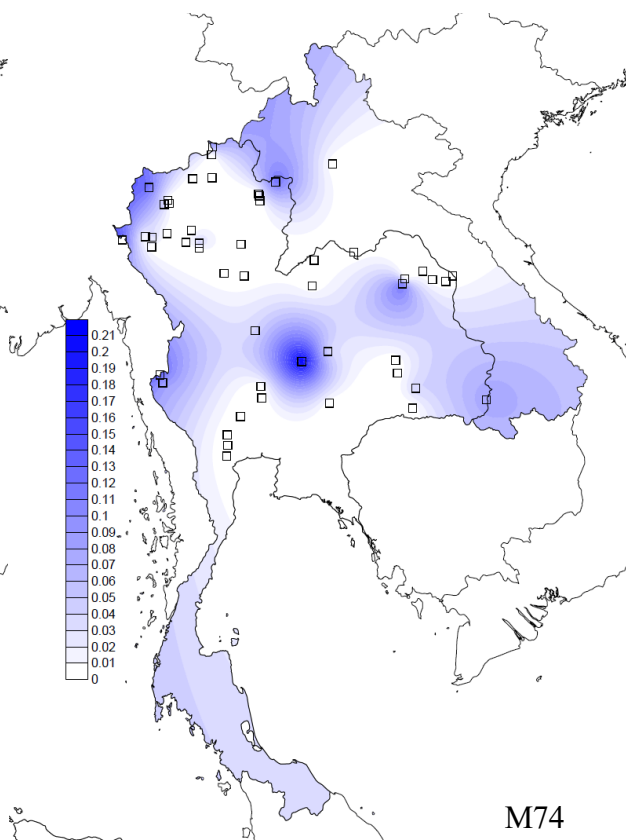

M74

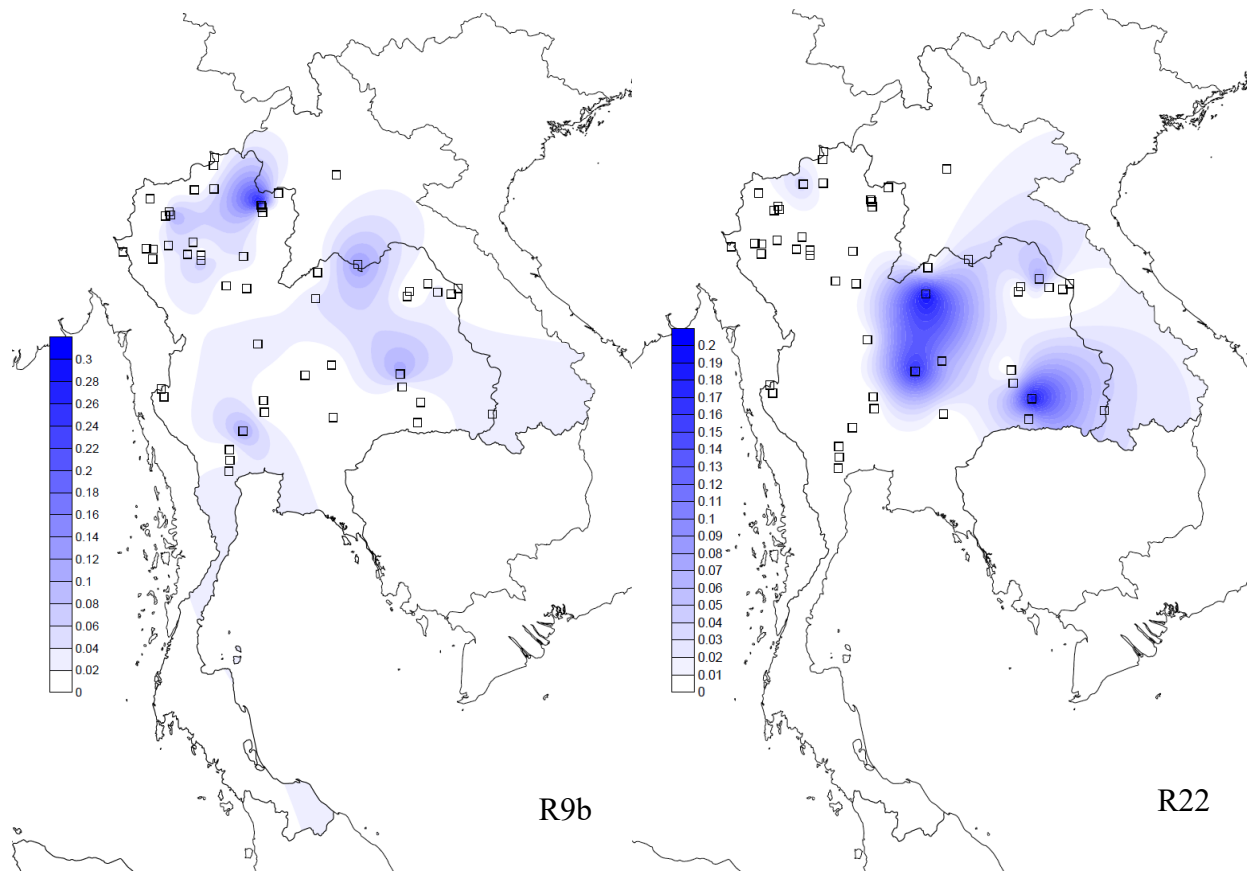

**Fig. S5** The contour maps of the frequencies of 14 haplogroups (F1, F1f, B5, B5a1d, B4, B6a, D, M7, M12, M20, M24, M74, R9b and R22) in Thai/Lao populations. The maps were generated by Golden Software Surfer 10.0.

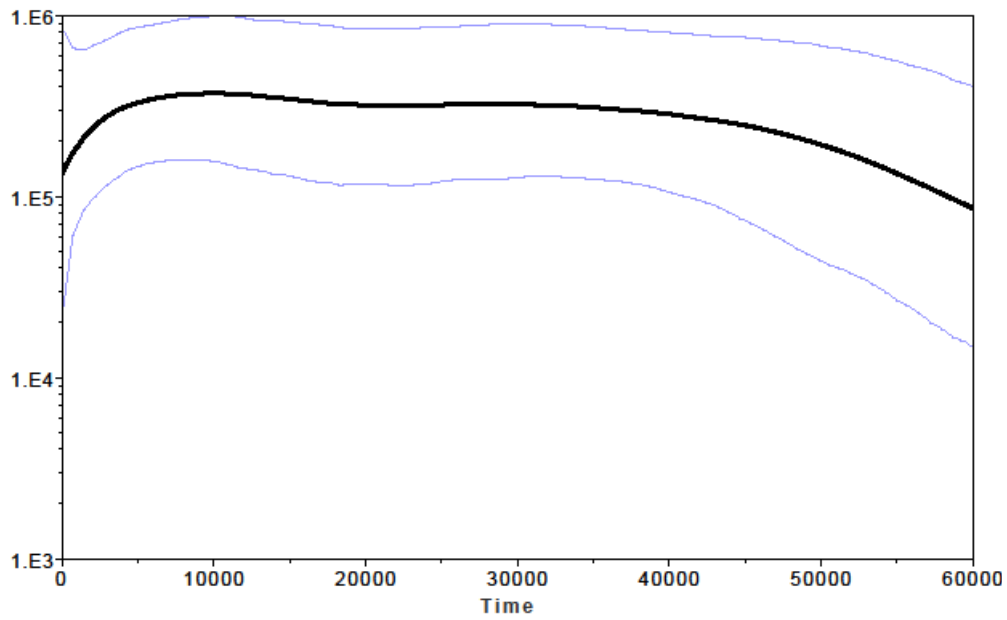

Khon Mueang1 (KM1)

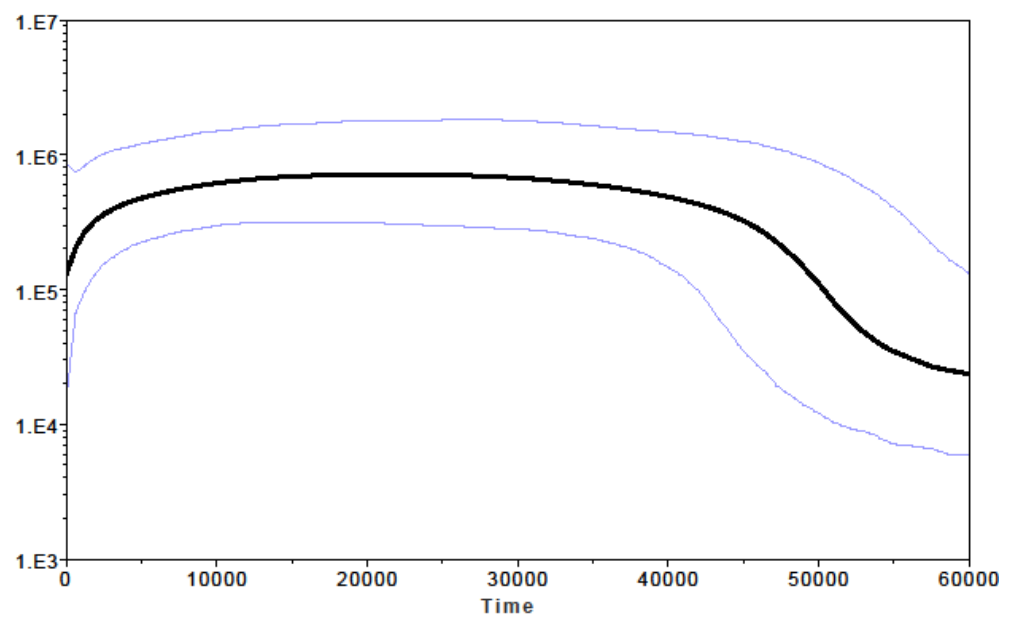

Khon Mueang2 (KM2)

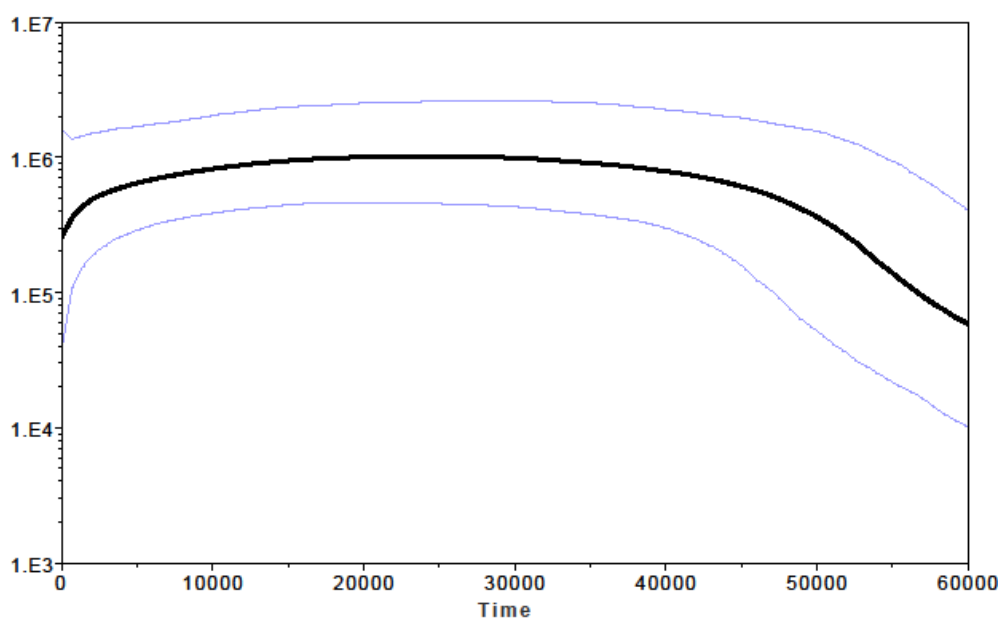

Khon Mueang3 (KM3)

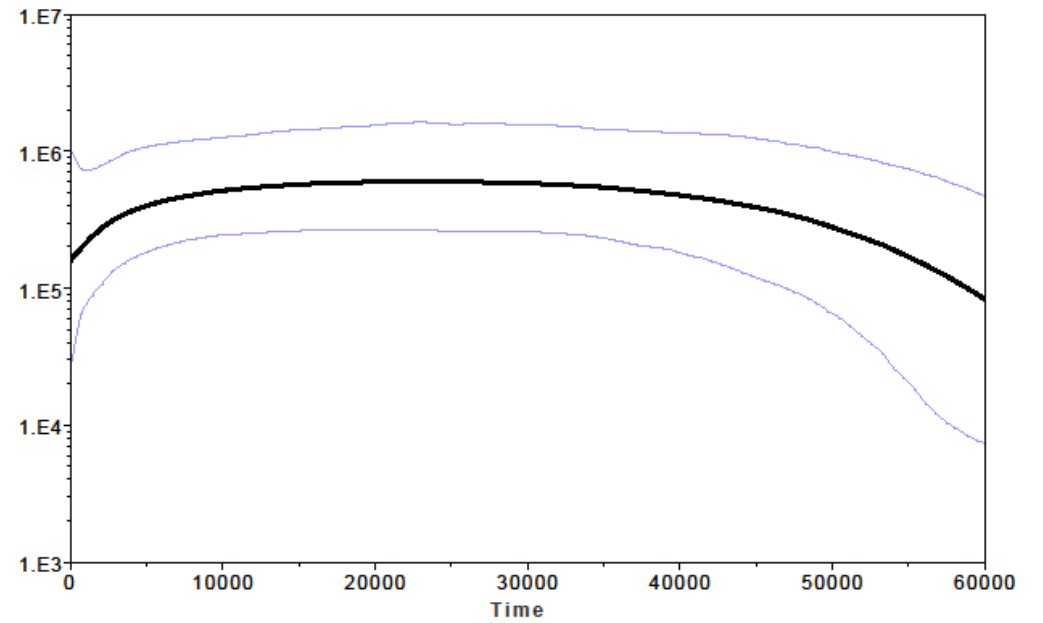

Khon Mueang4 (KM4)

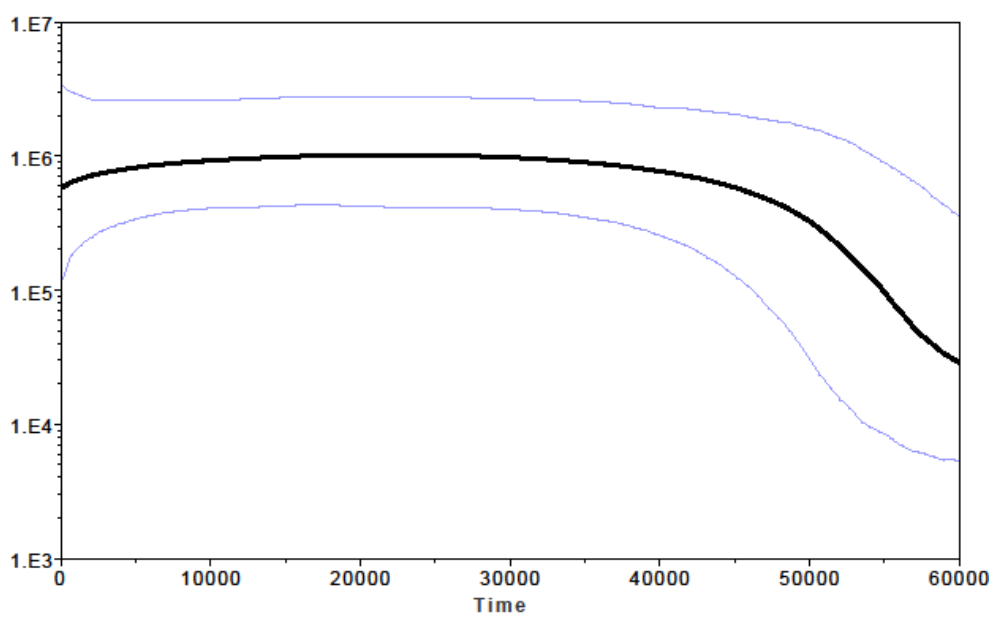

Khon Mueang5 (KM5)

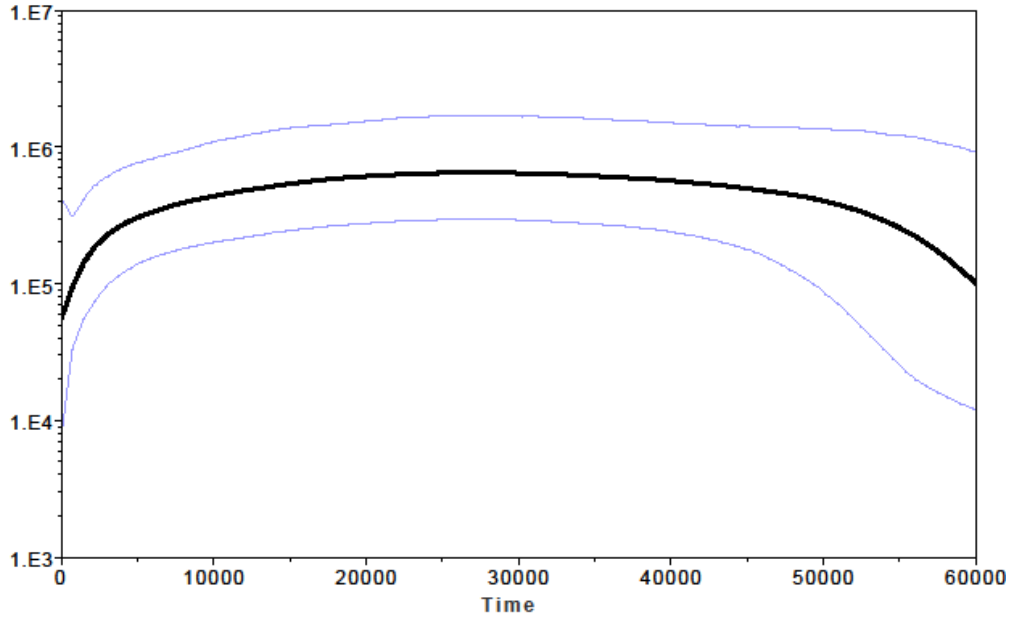

Khon Mueang6 (KM6)

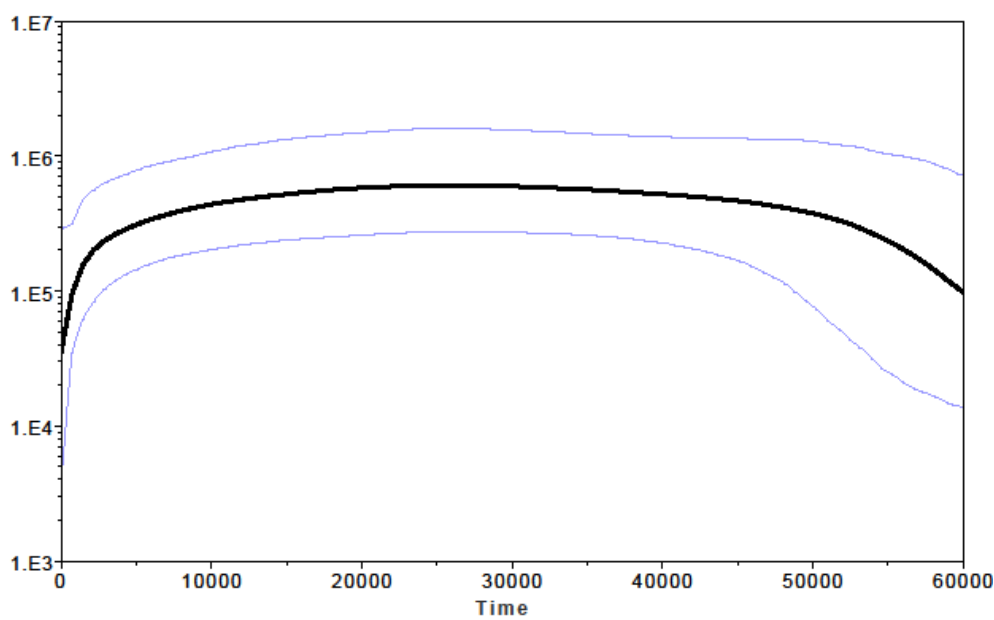

Khon Mueang7 (KM7)

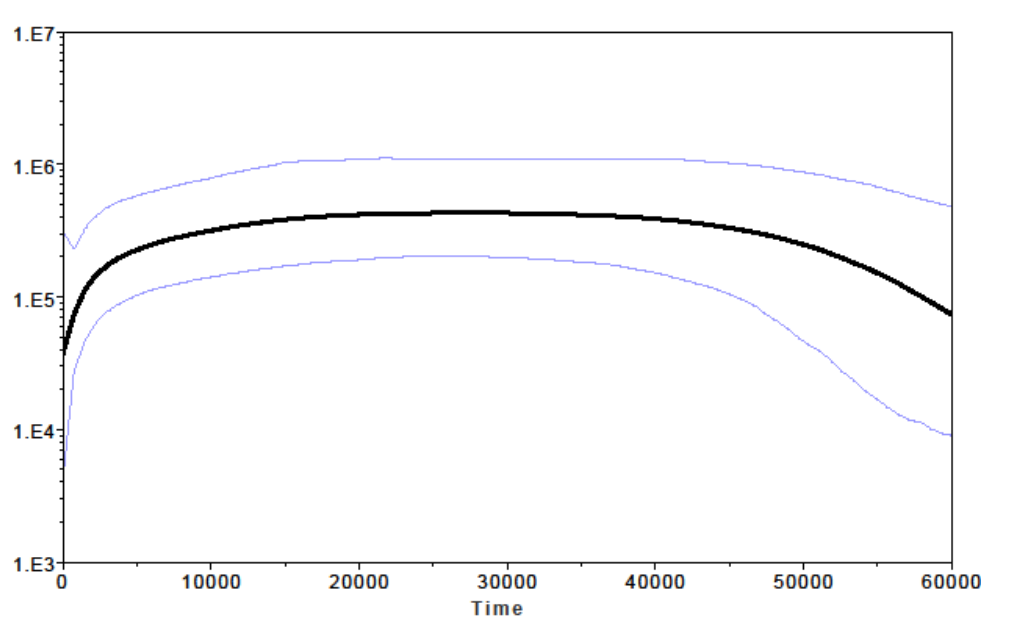

Khon Mueang8 (KM8)

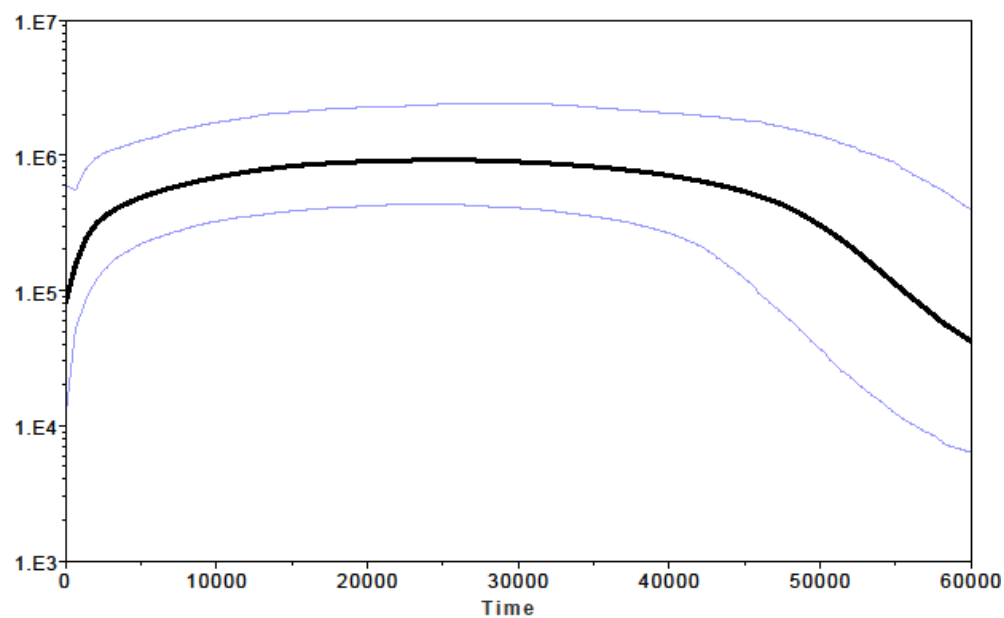

Khon Mueang9 (KM9)

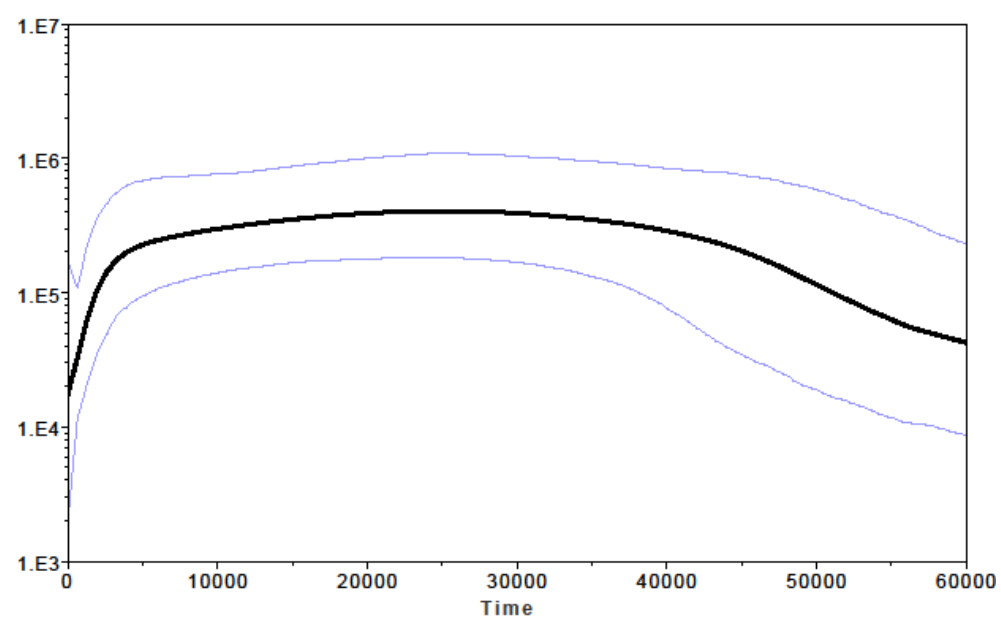

Khon Mueang10 (KM10)

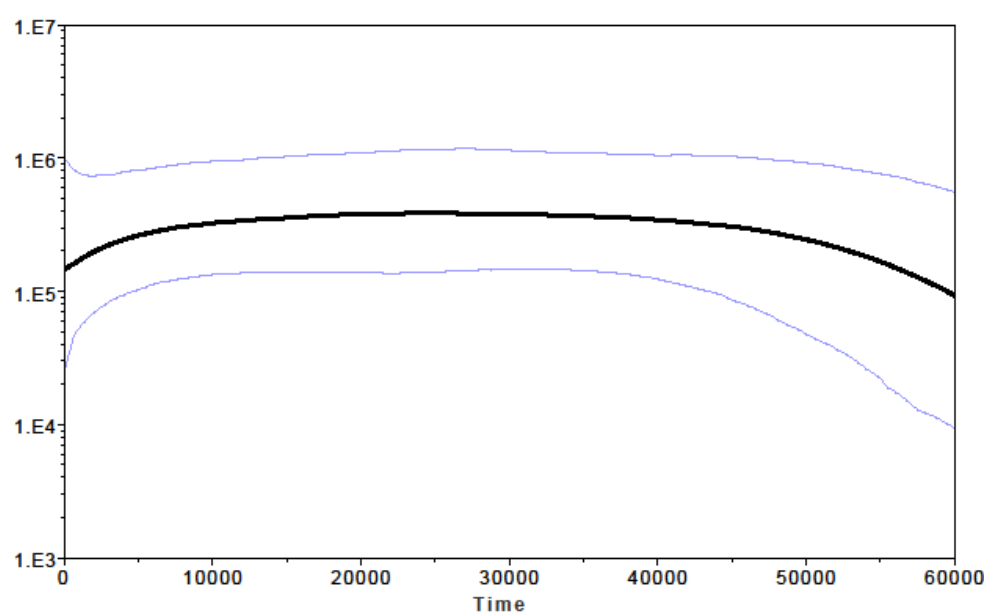

Yuan1 (YU1)

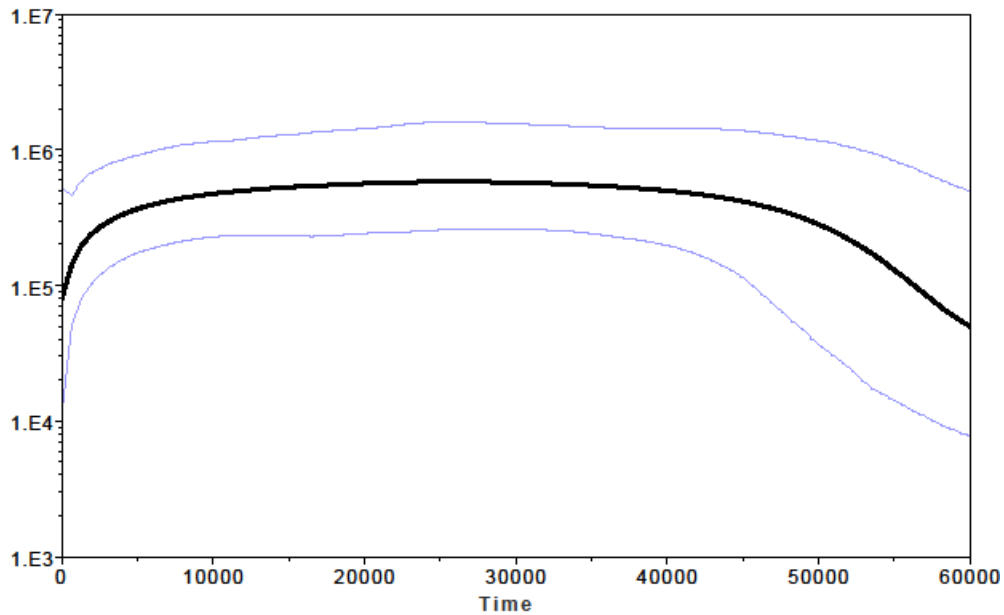

Yuan2 (YU2)

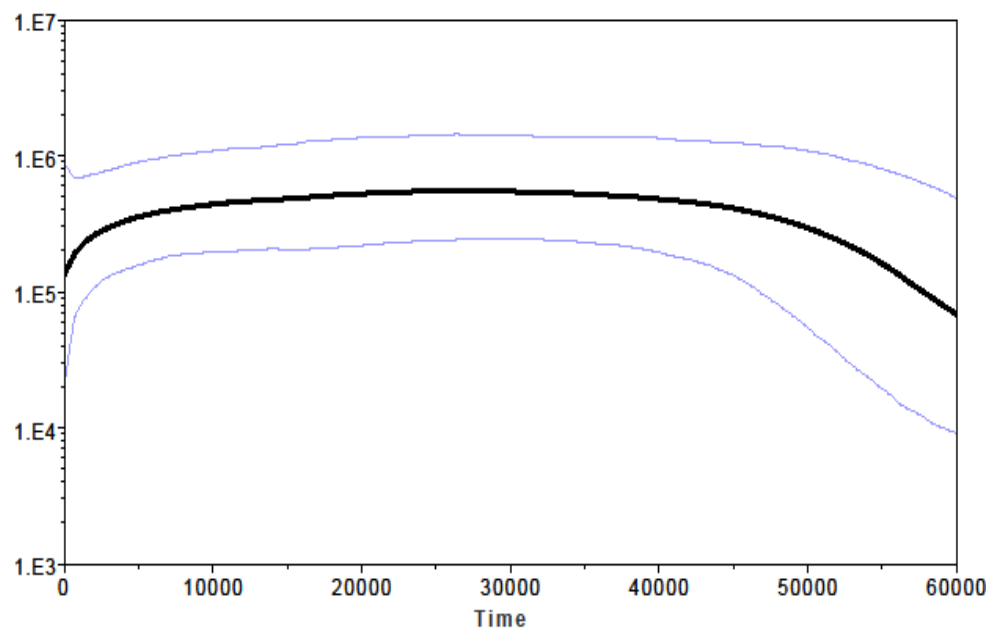

Shan (SH)

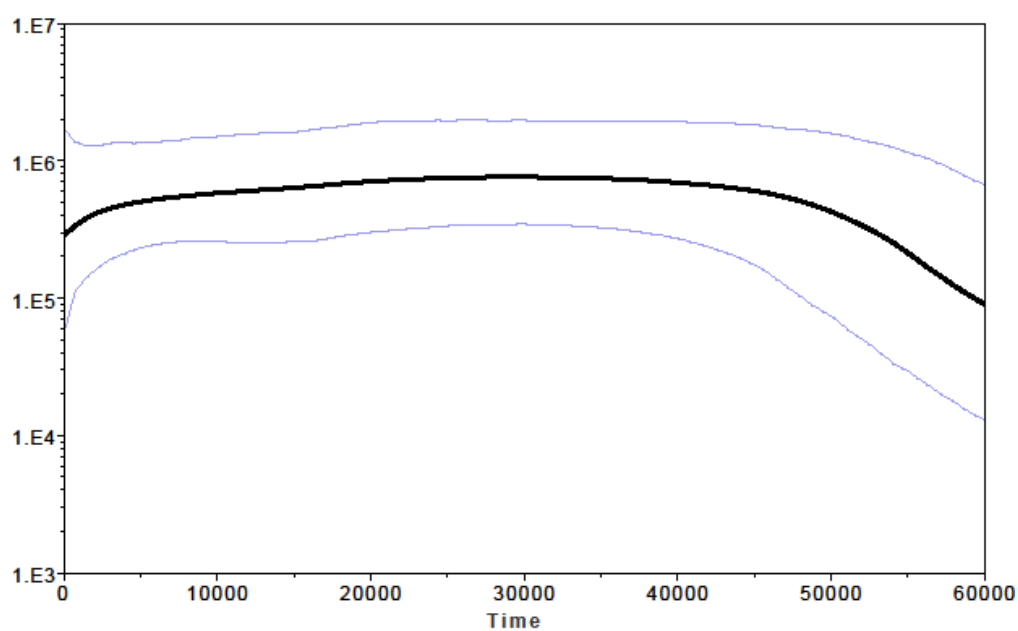

Lao Isan1 (IS1)

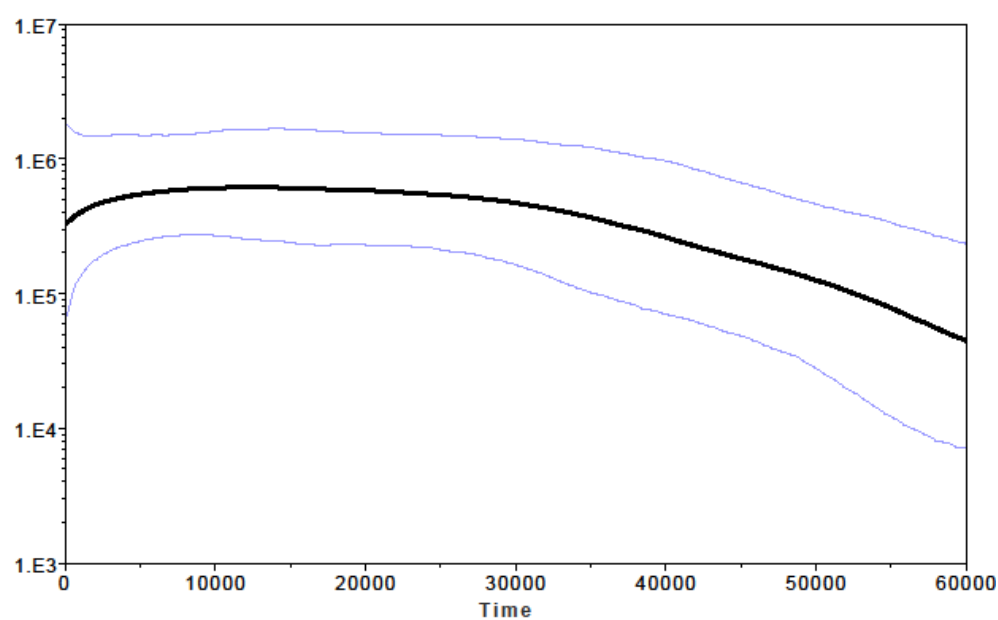

Lao Isan2 (IS2)

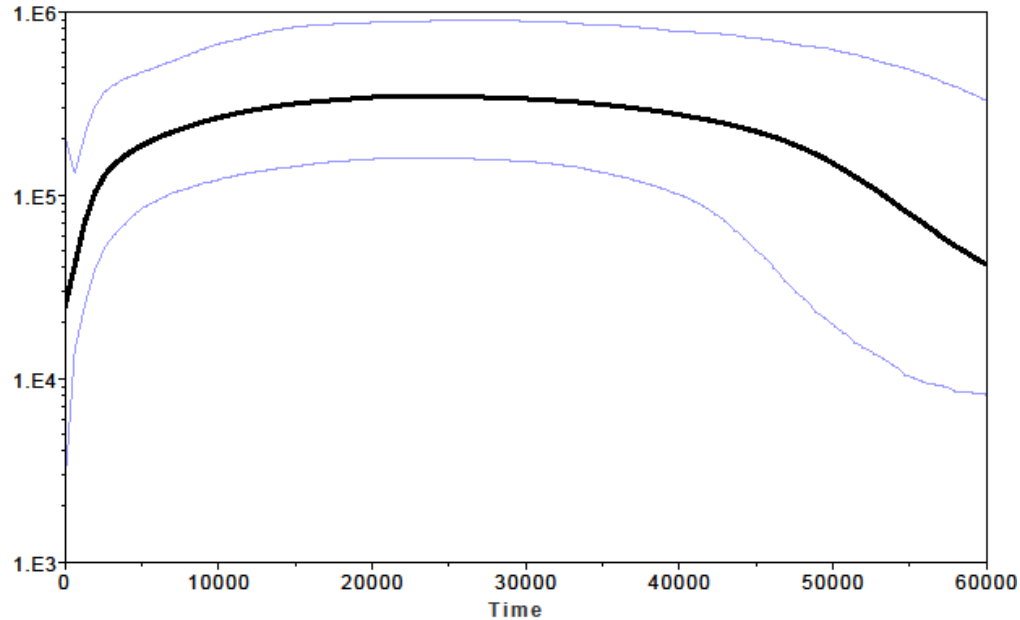

Lao Isan3 (IS3)

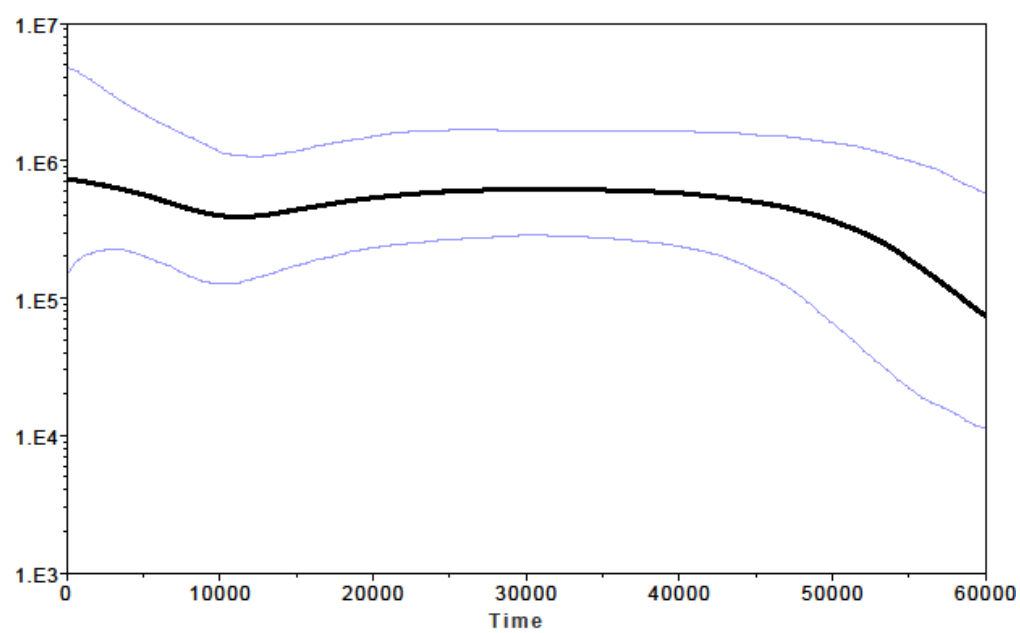

Lao Isan4 (IS4)

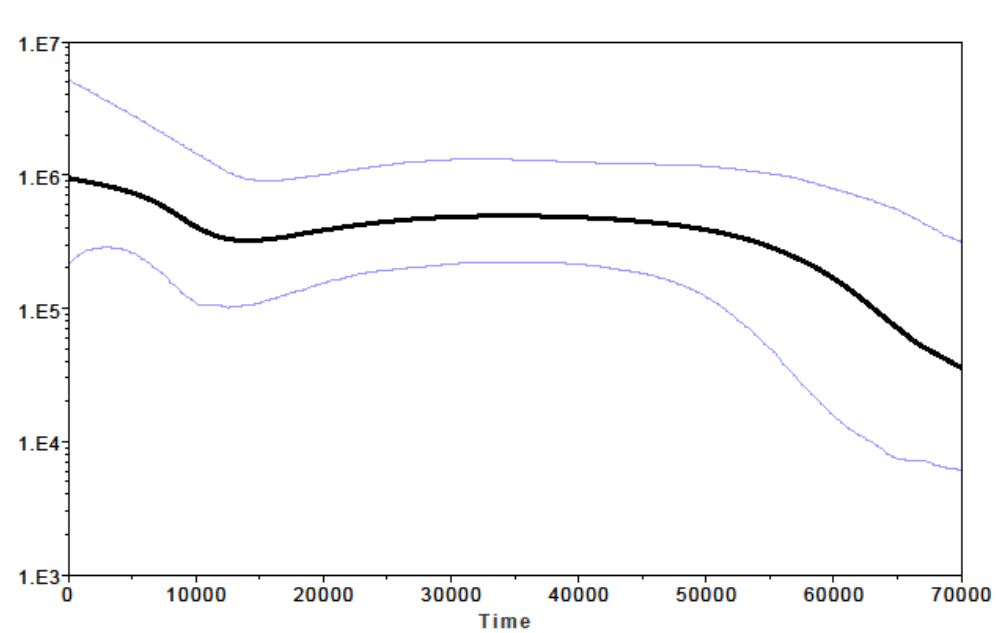

Lao Lum1 (LA1)

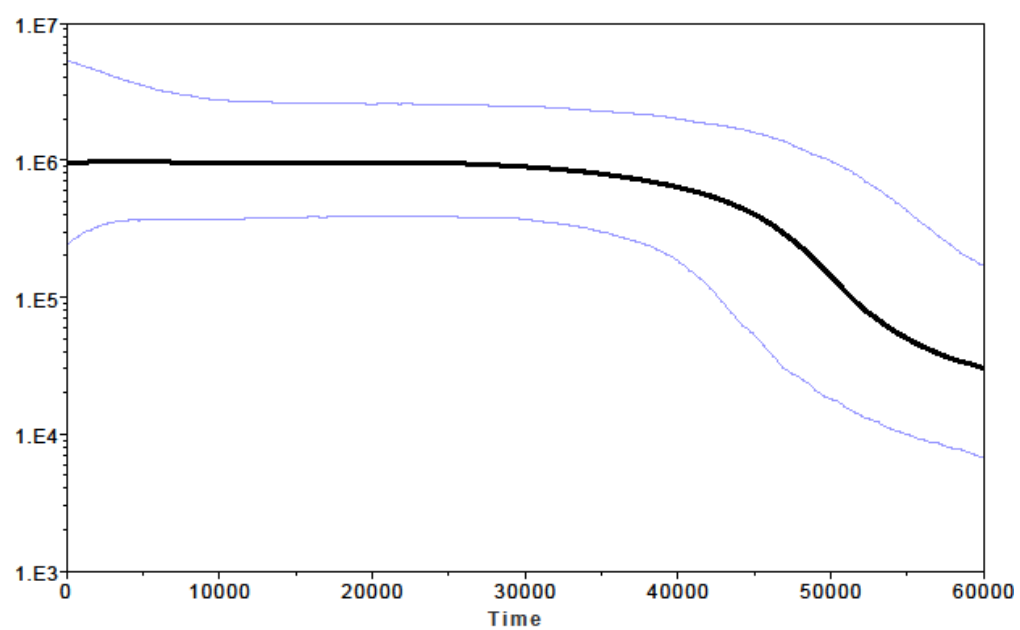

Lao Lum2 (LA2)

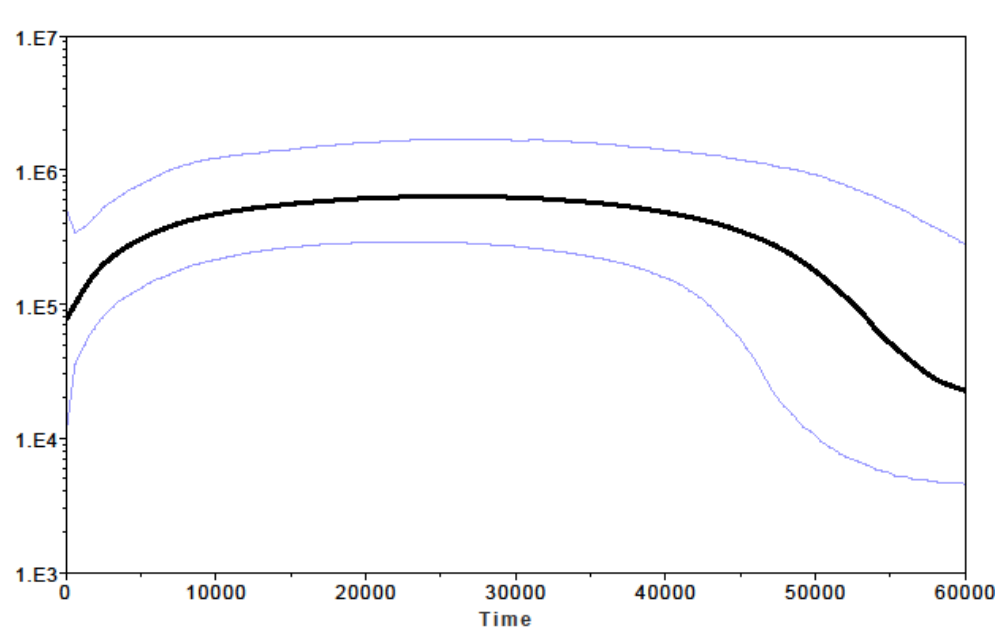

Phutai (PT)

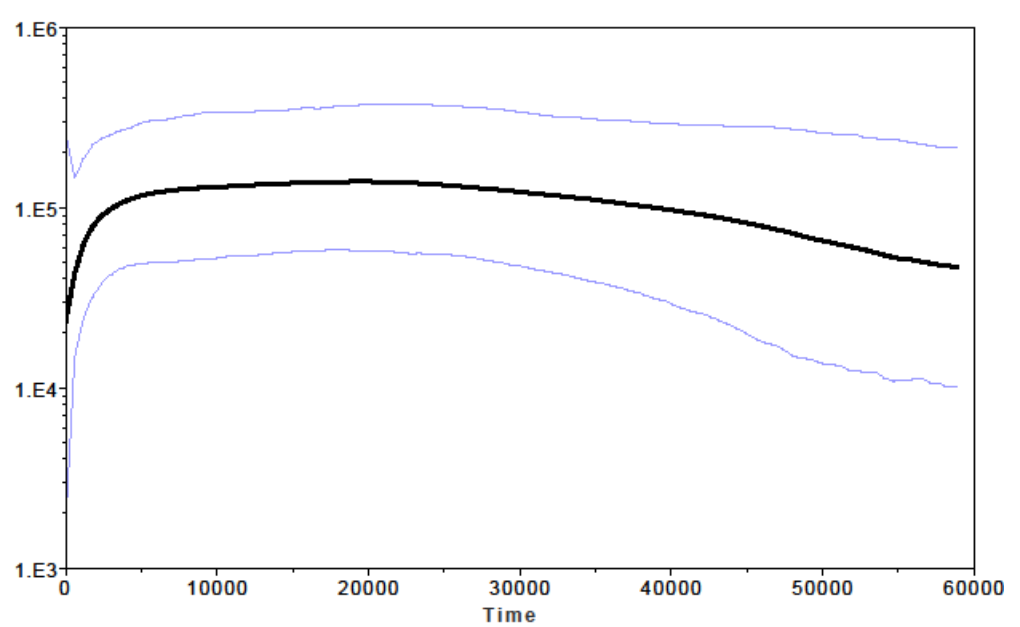

Kalueang (KL)

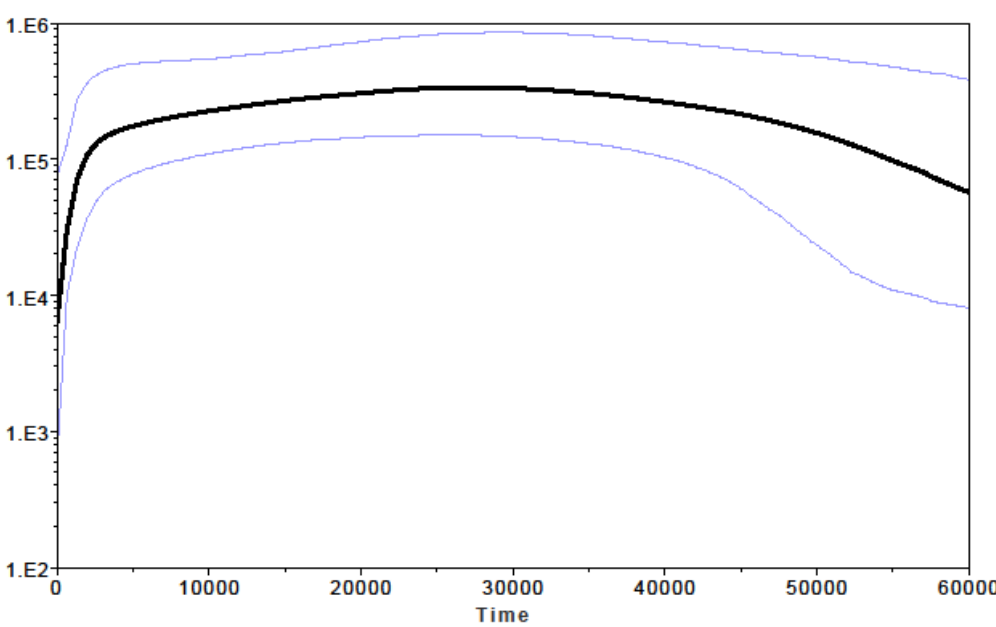

Seak (SK)

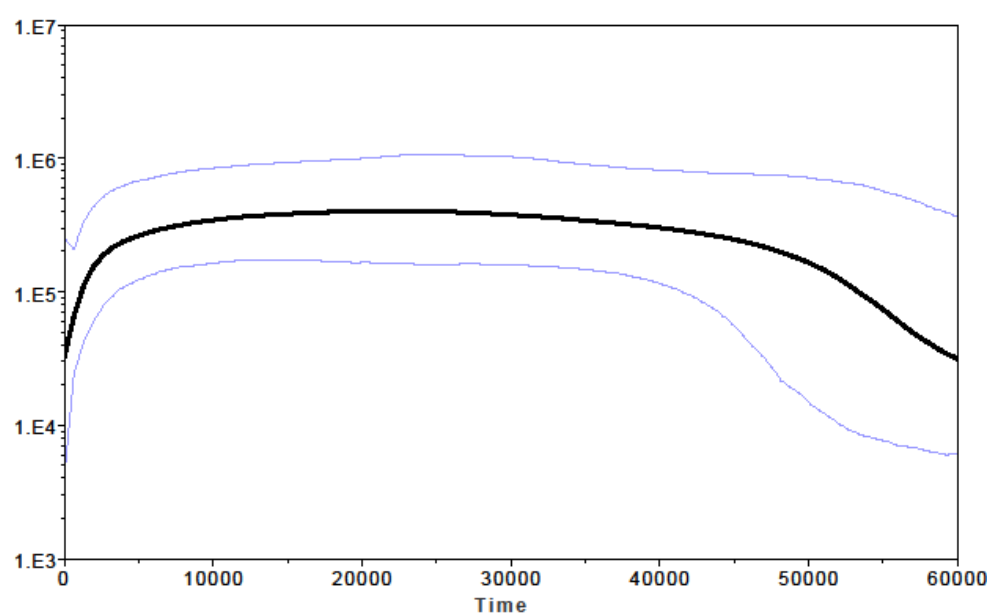

Nyaw (NY)

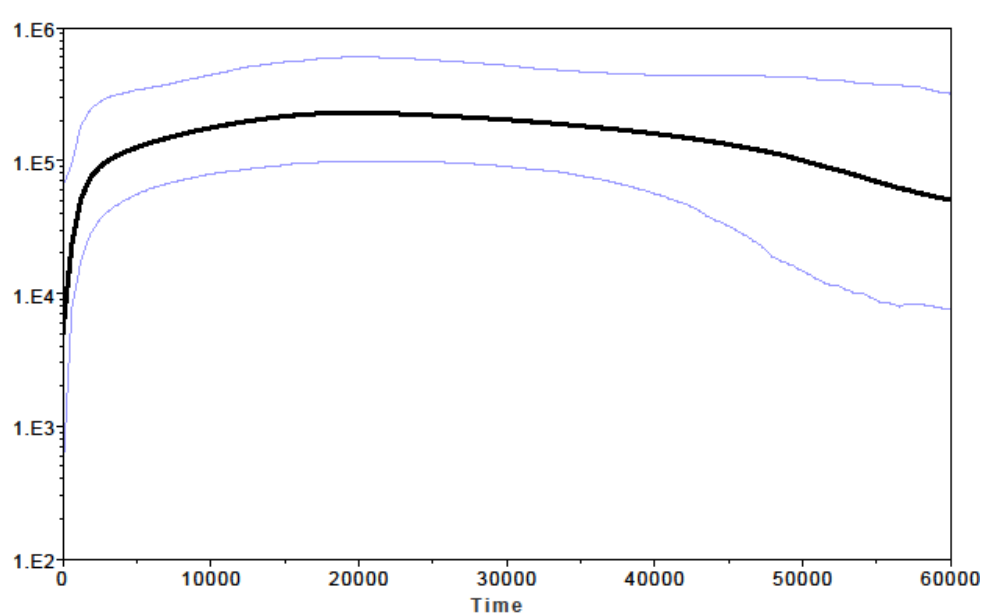

Black Tail (BT1)

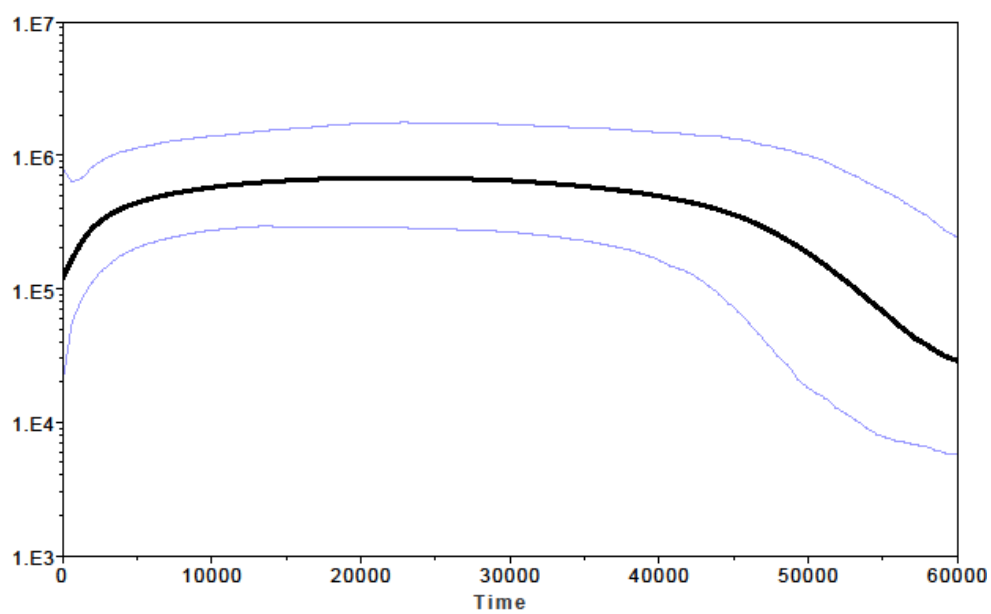

Black Tai2 (BT2)

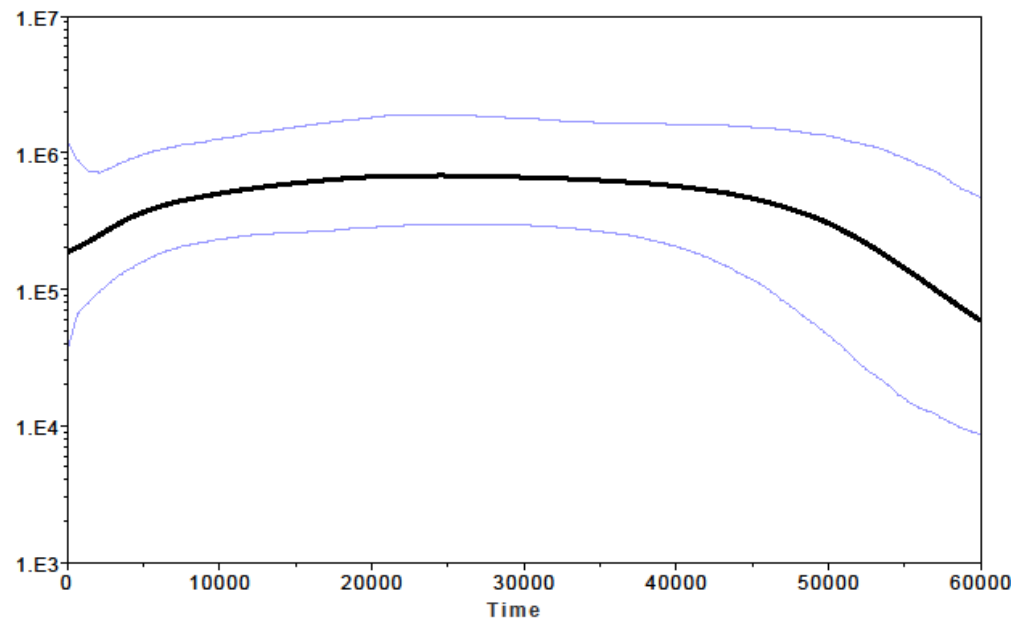

Phuan1 (PU1)

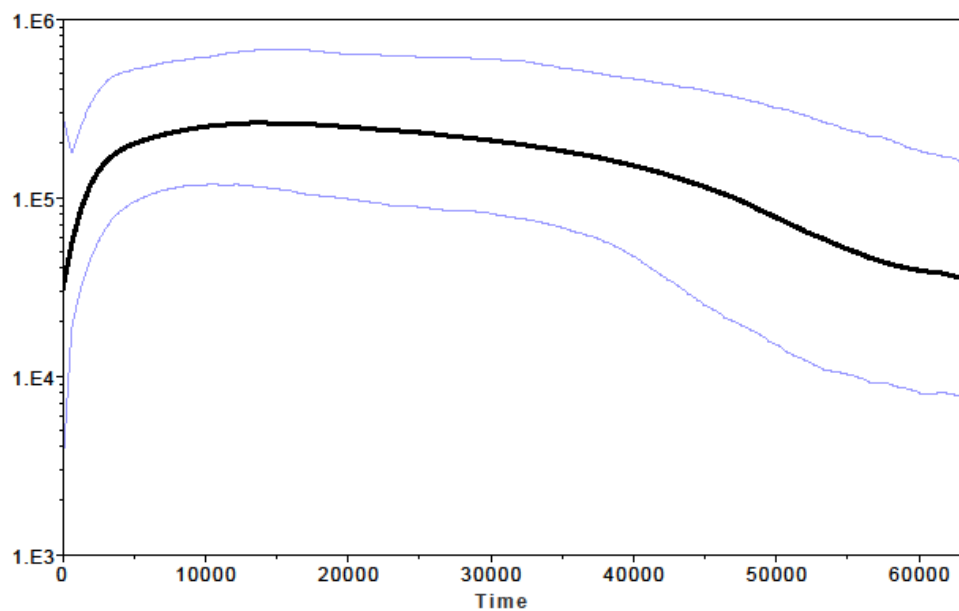

Phuan2 (PU2)

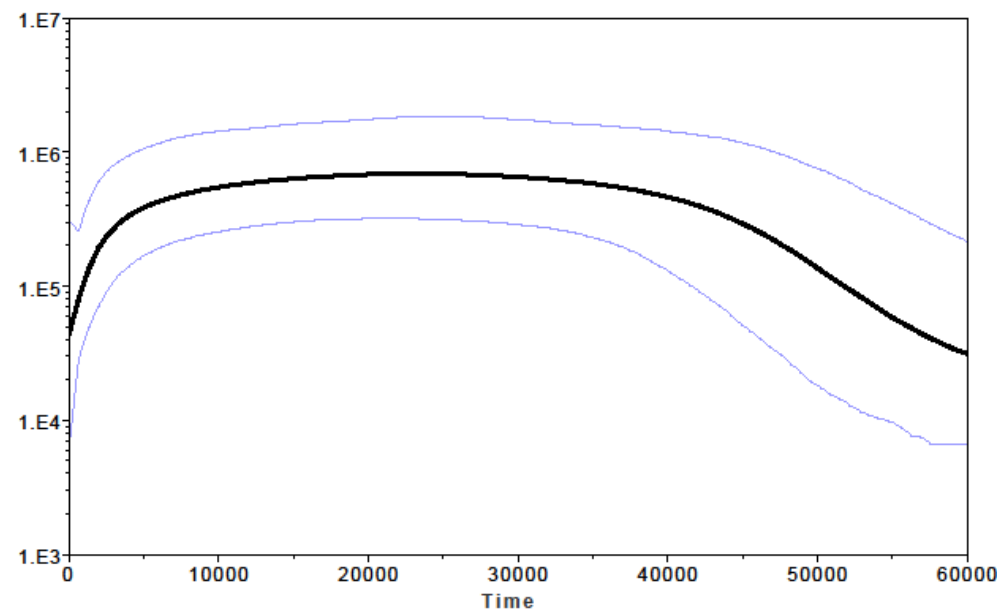

Phuan3 (PU3)

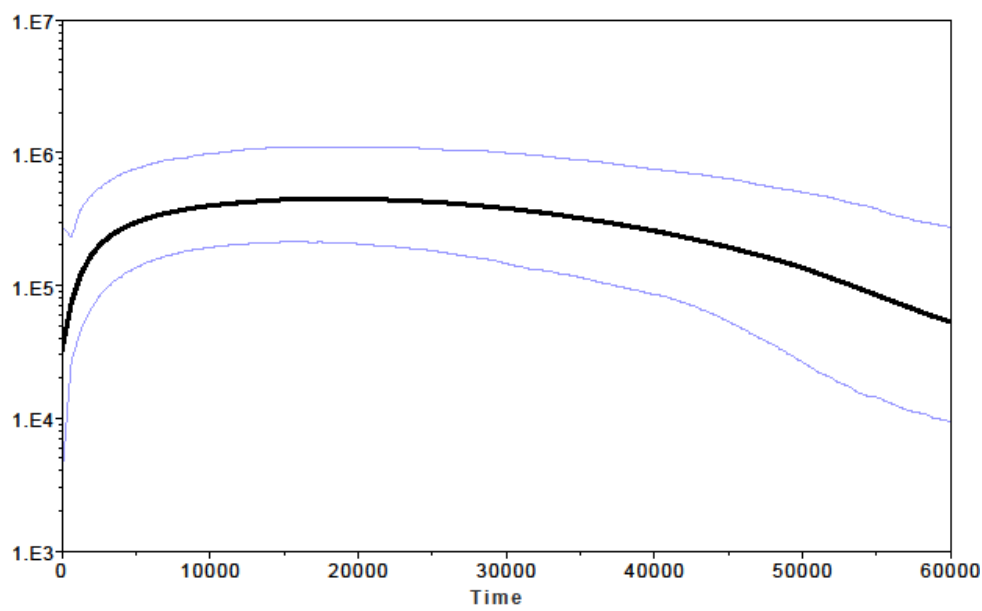

Phuan4 (PU4)

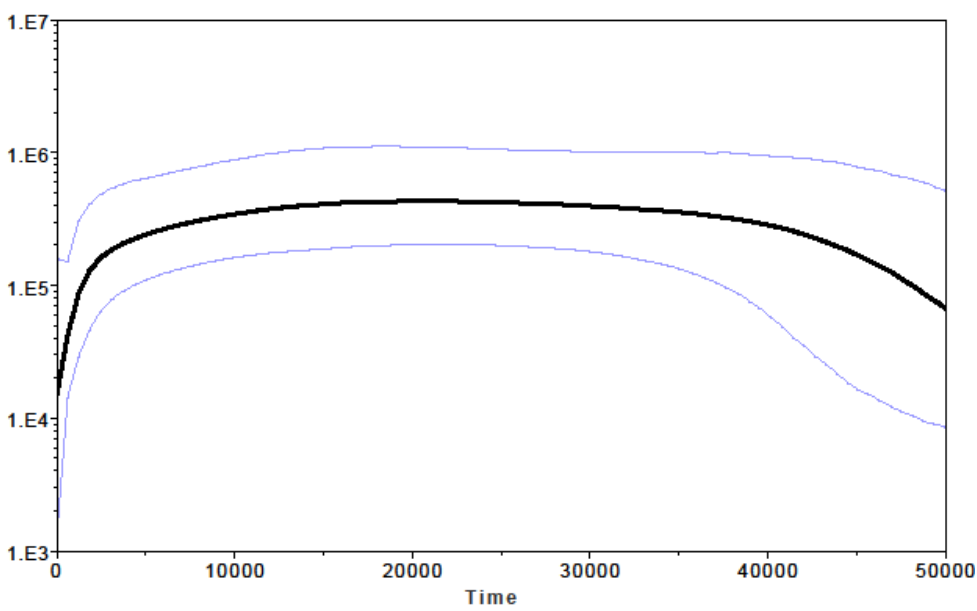

Phuan5 (PU5)

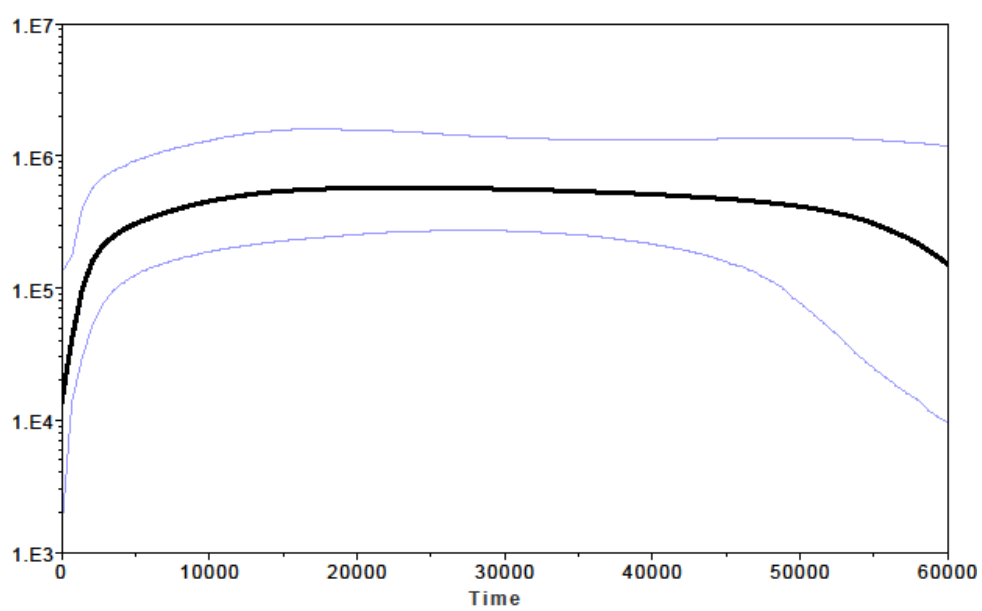

Mon1 (MO1)

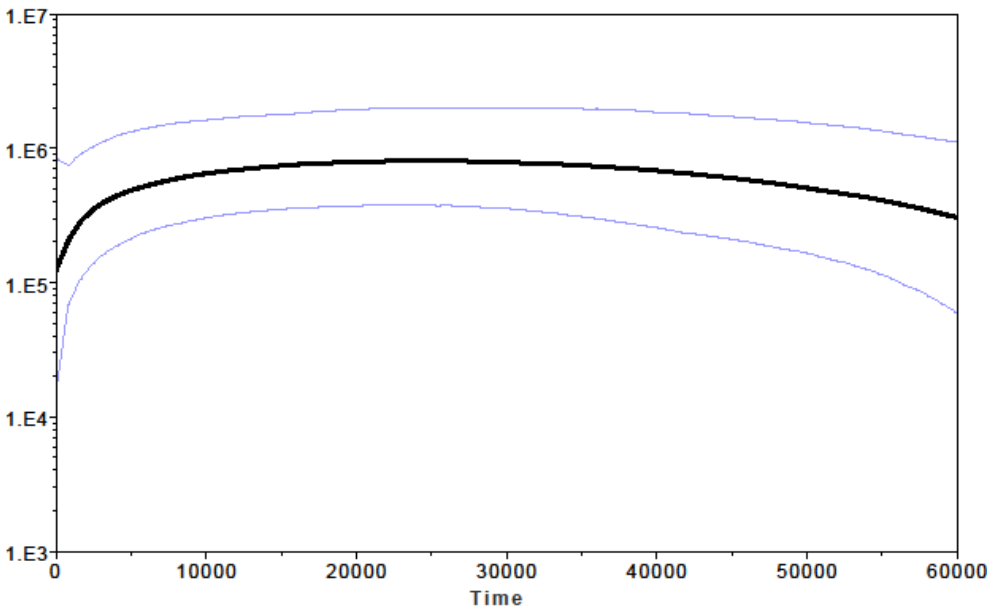

Mon2 (MO2)

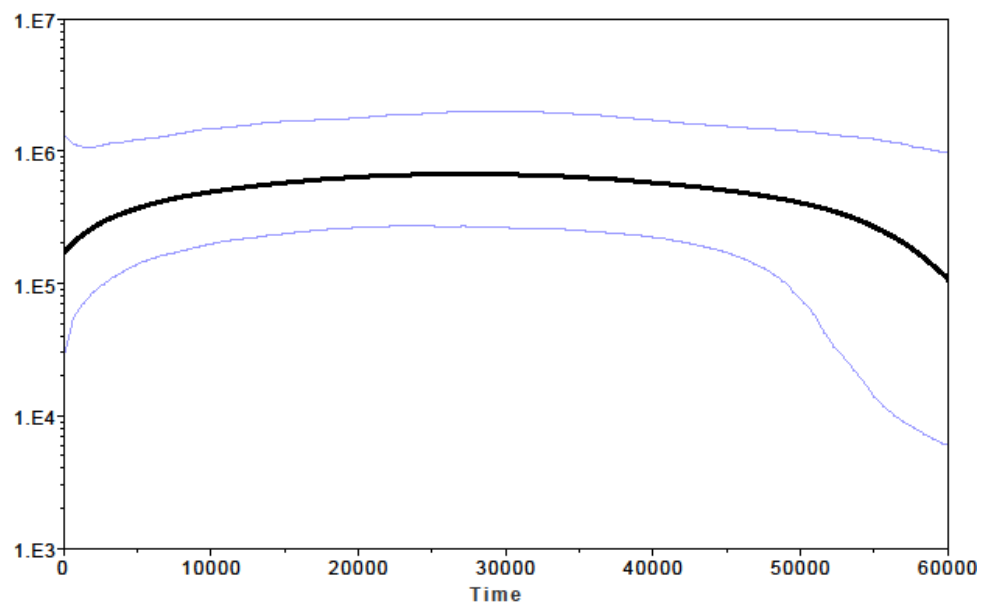

Mon3 (MO3)

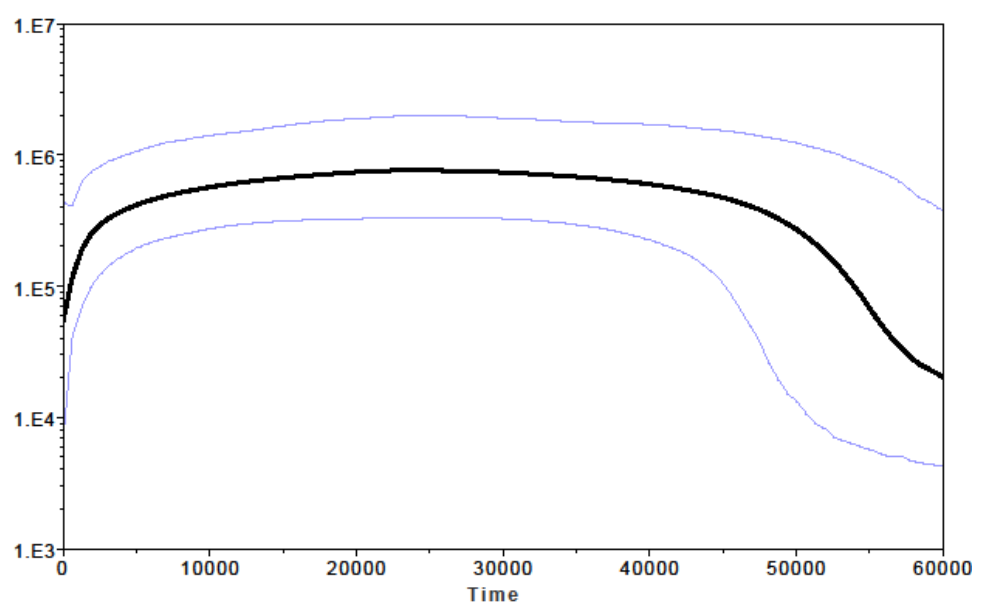

Mon4 (MO4)

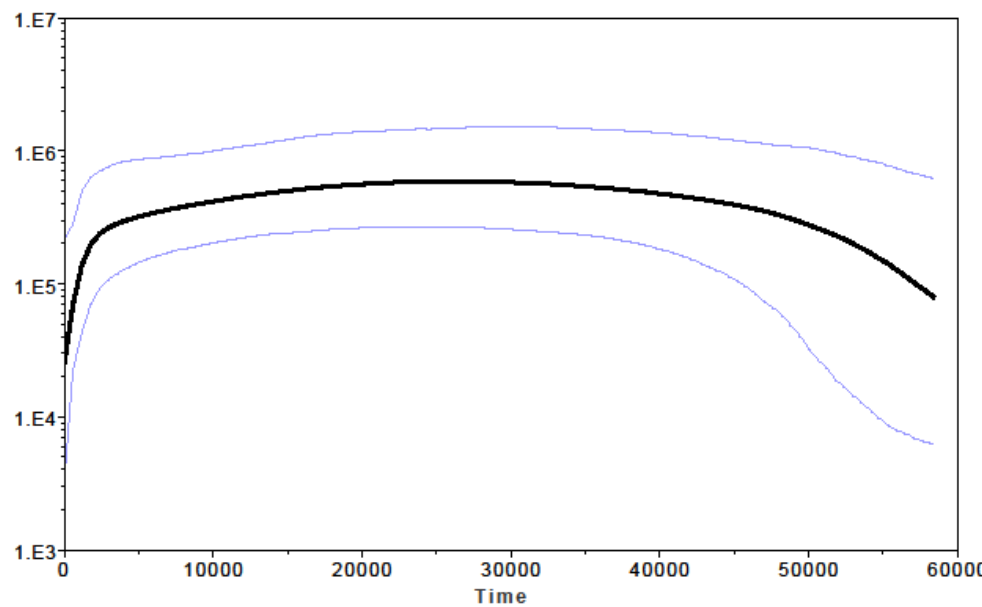

Mon5 (MO5)

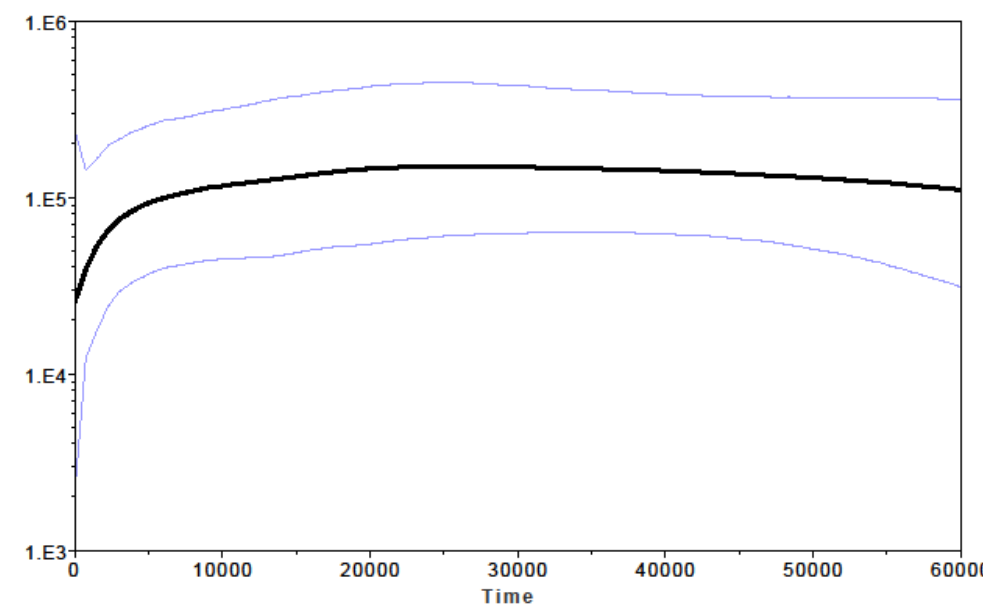

Khmer1 (KH1)

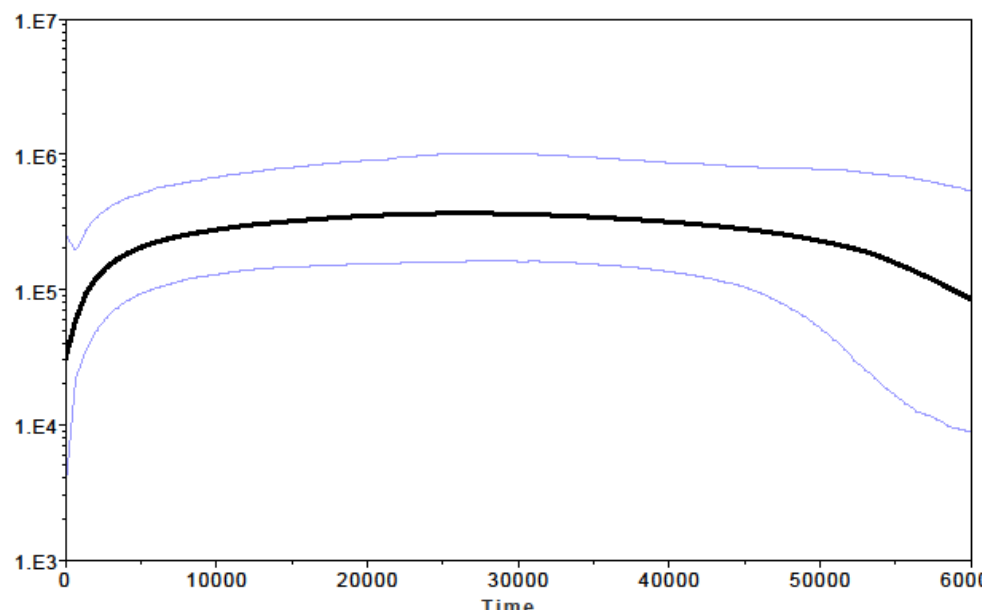

Khmer2 (KH2)

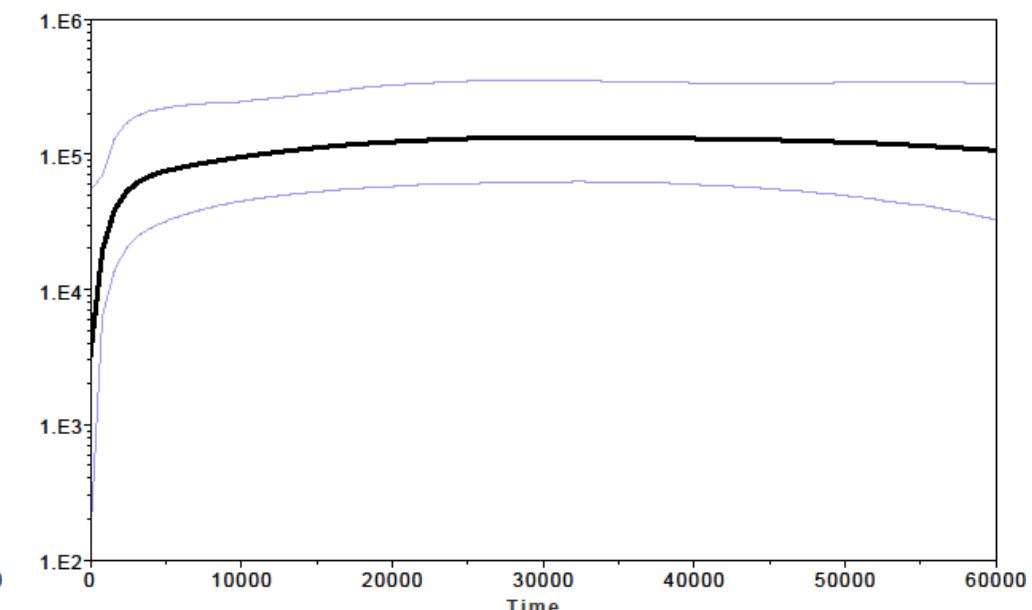

Nyahkur (BO)

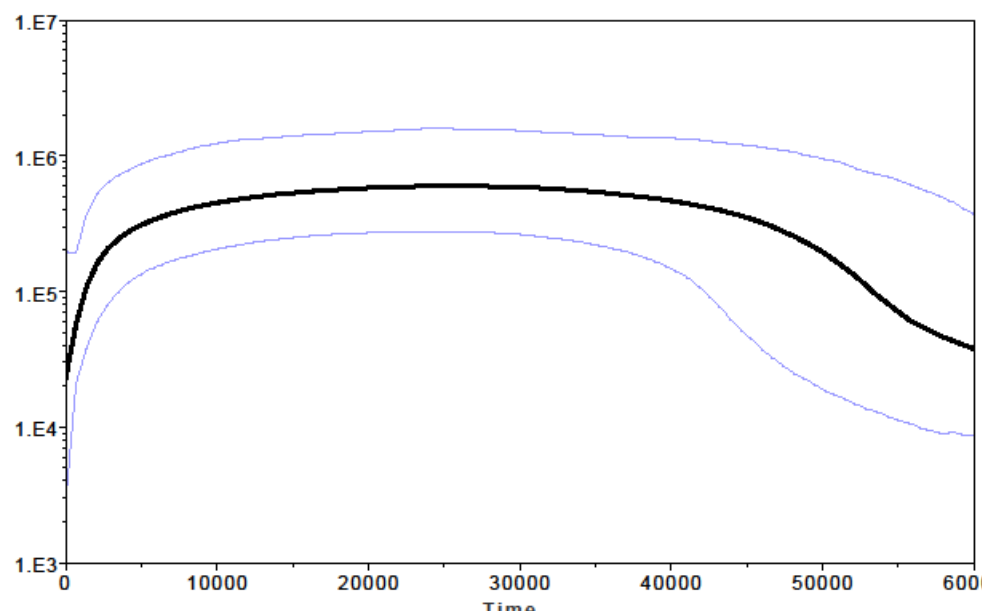

Suay (SU)

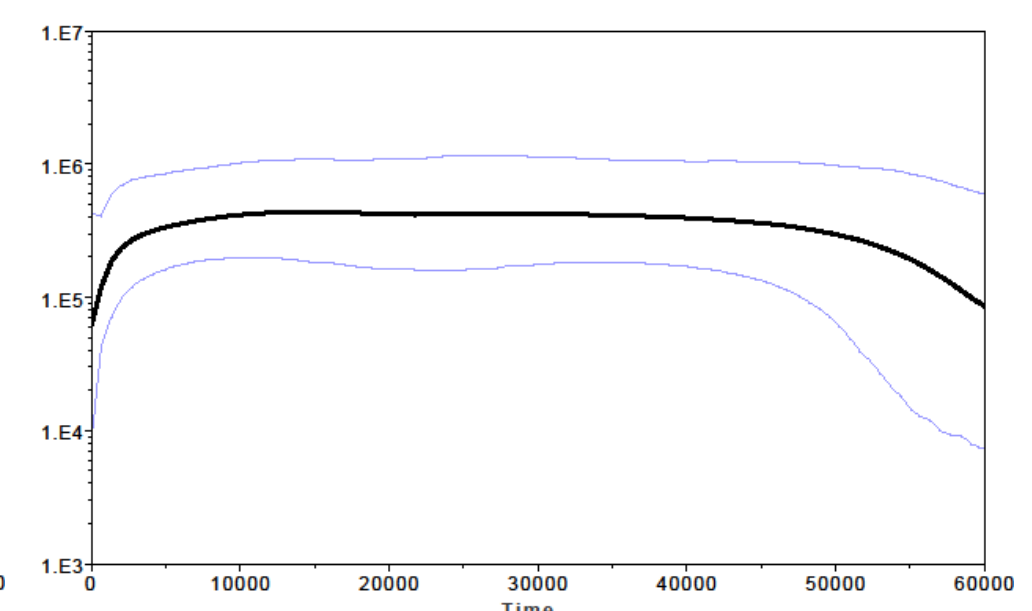

Soa (SO)

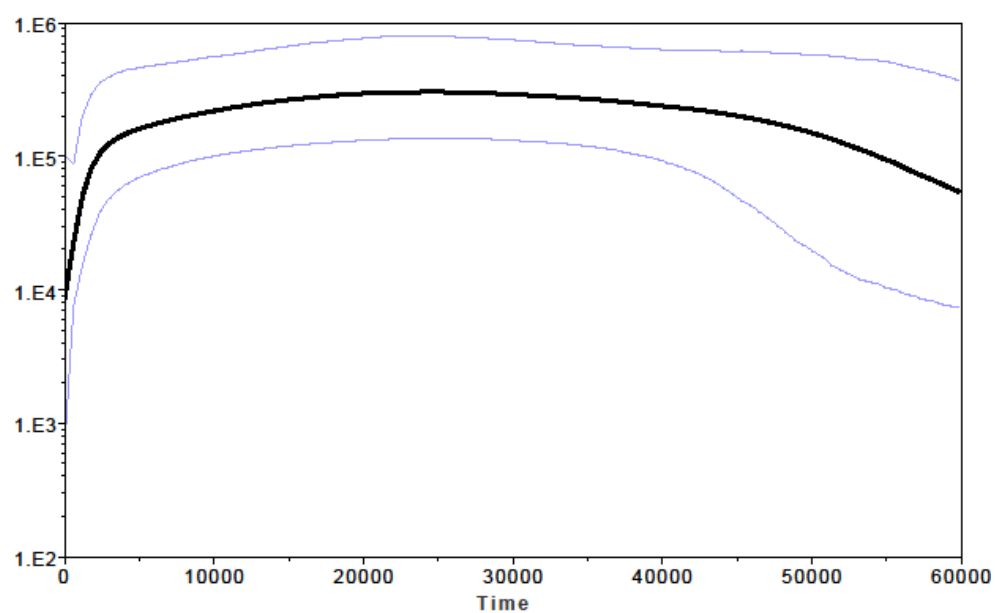

Bru (BU)

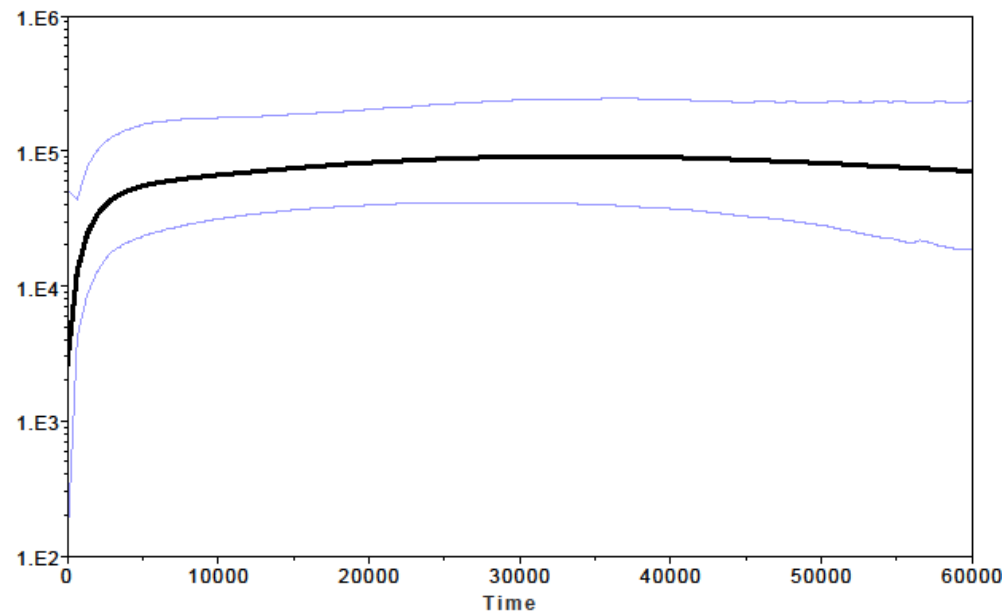

H'tin1 (TN1)

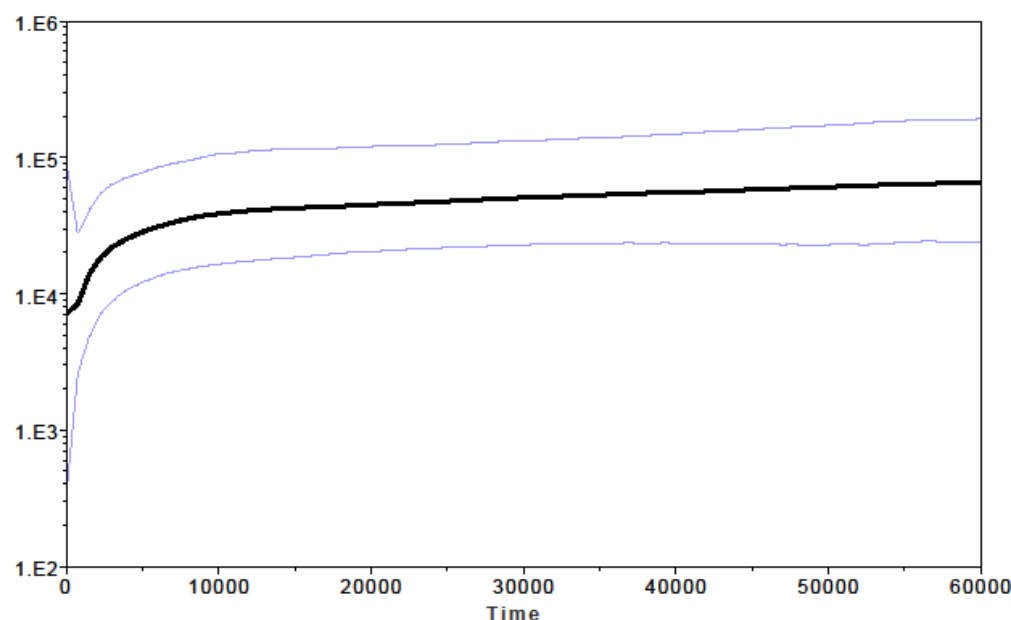

H'tin2 (TN2)

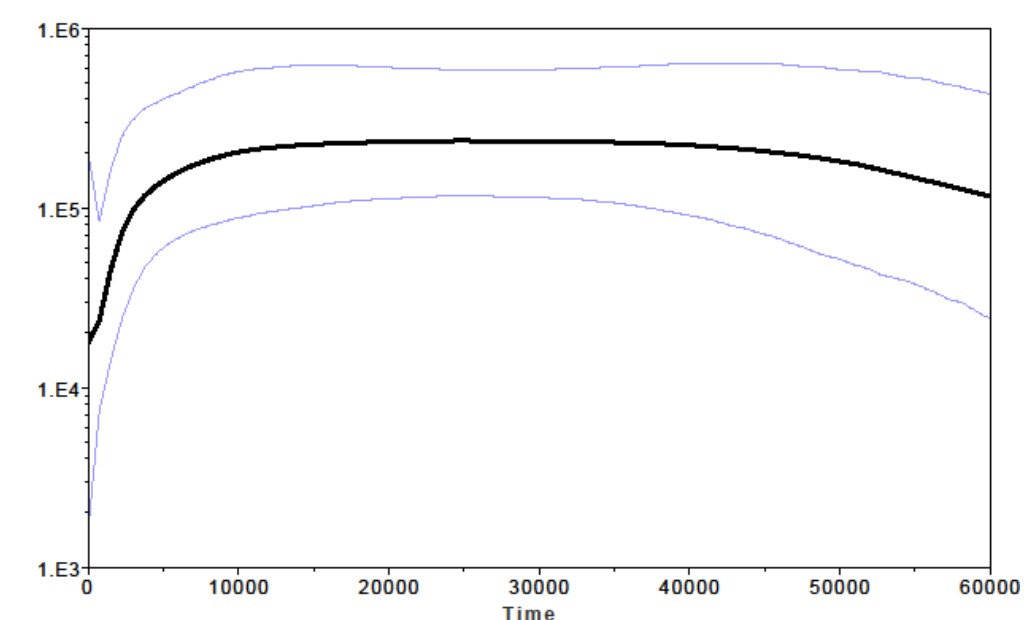

H'tin3 (TN3)

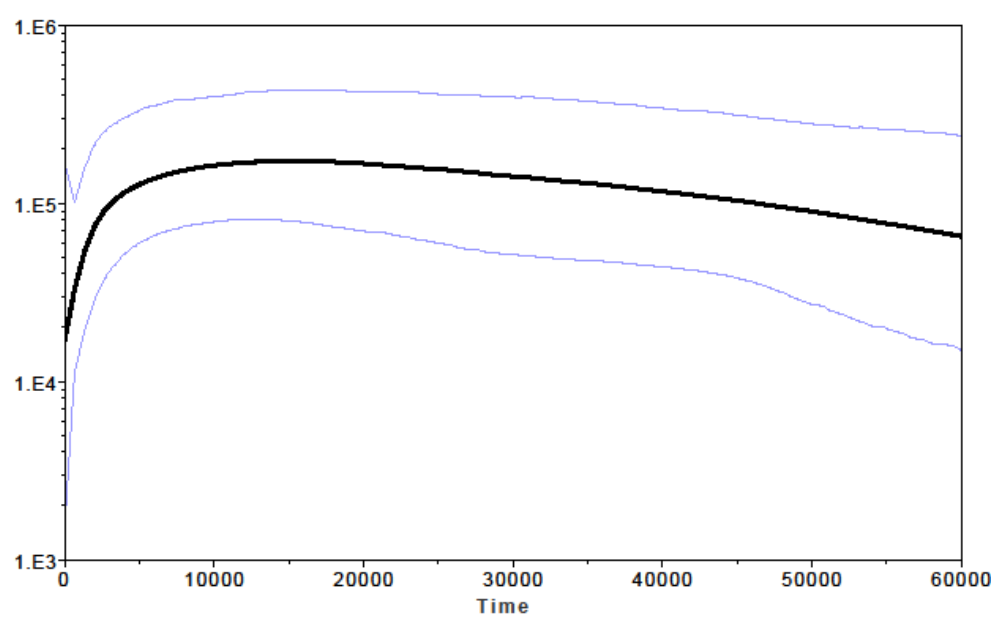

Khamu (KA)

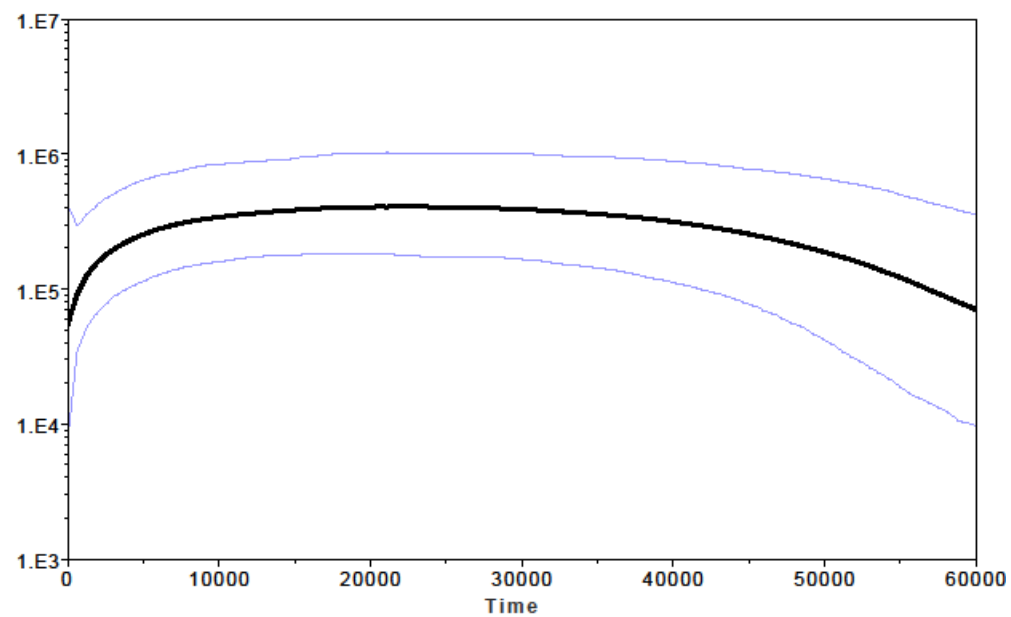

Blang1 (BL1)

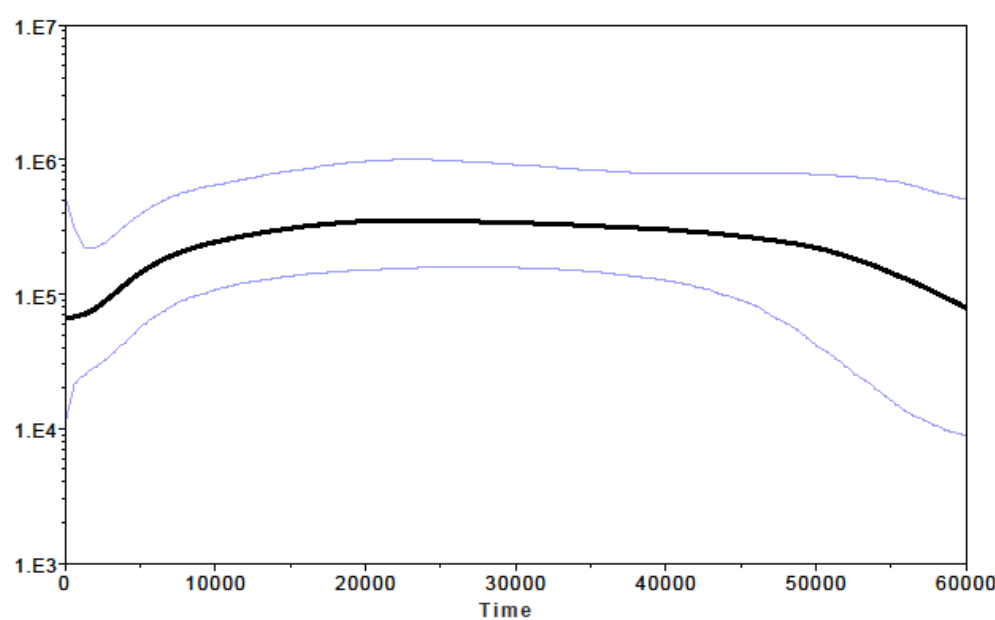

Blang2 (BL2)

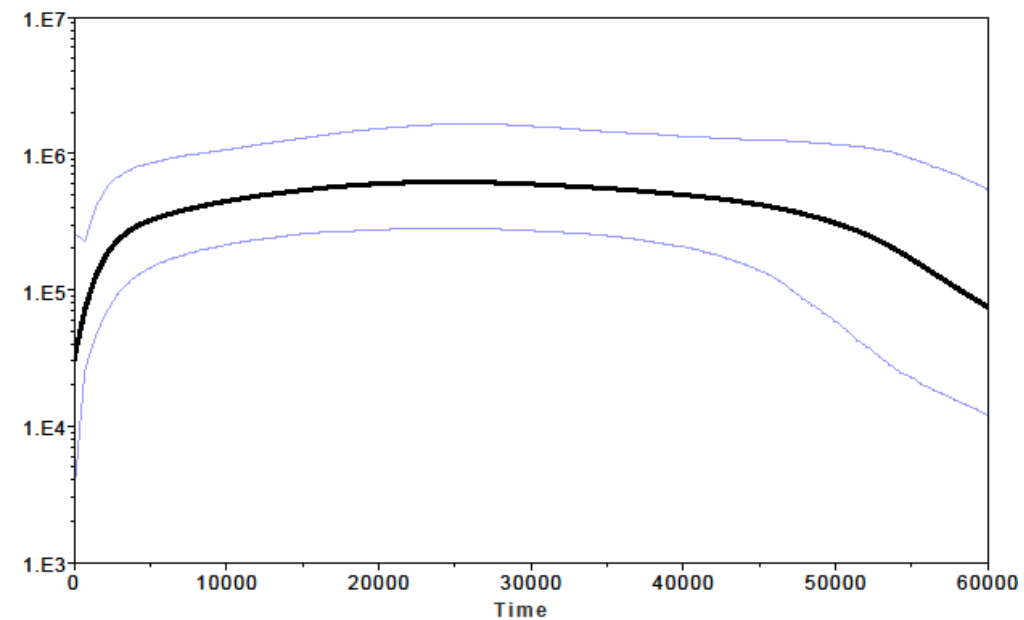

Paluang (PL)

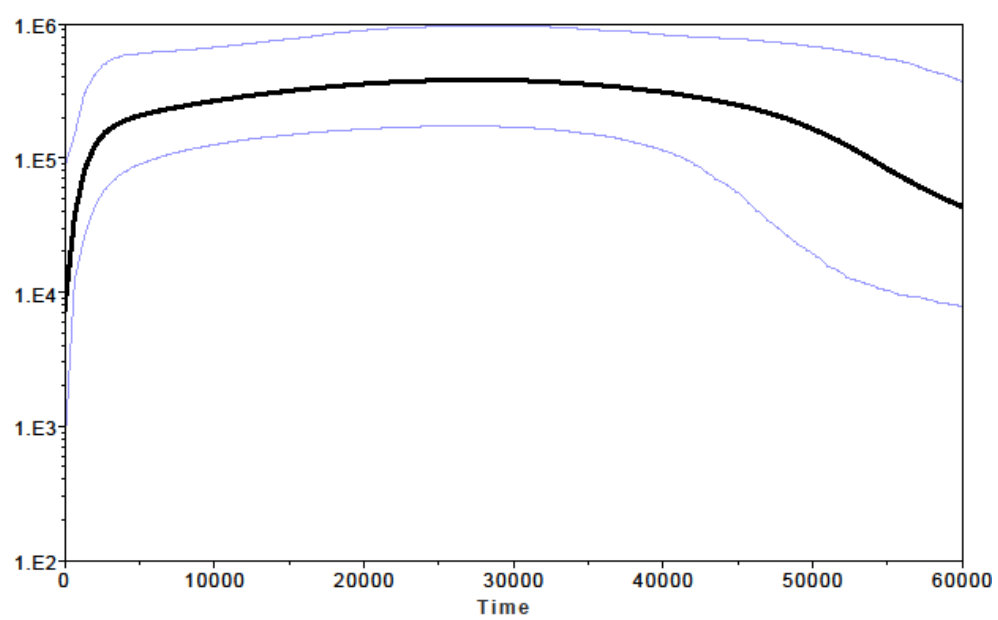

Lawa1 (LW1)

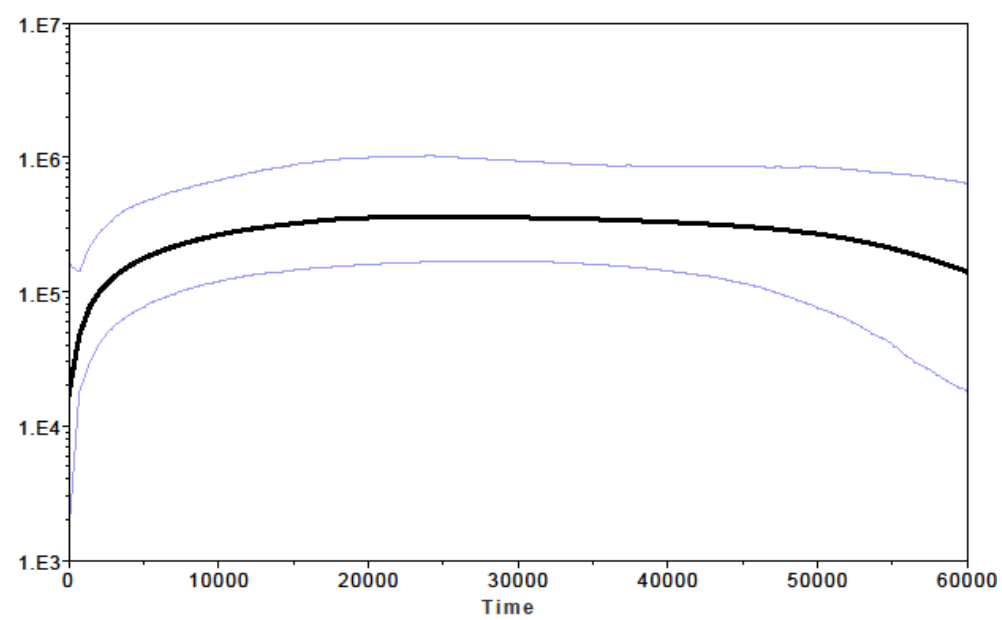

Lawa2 (LW2)

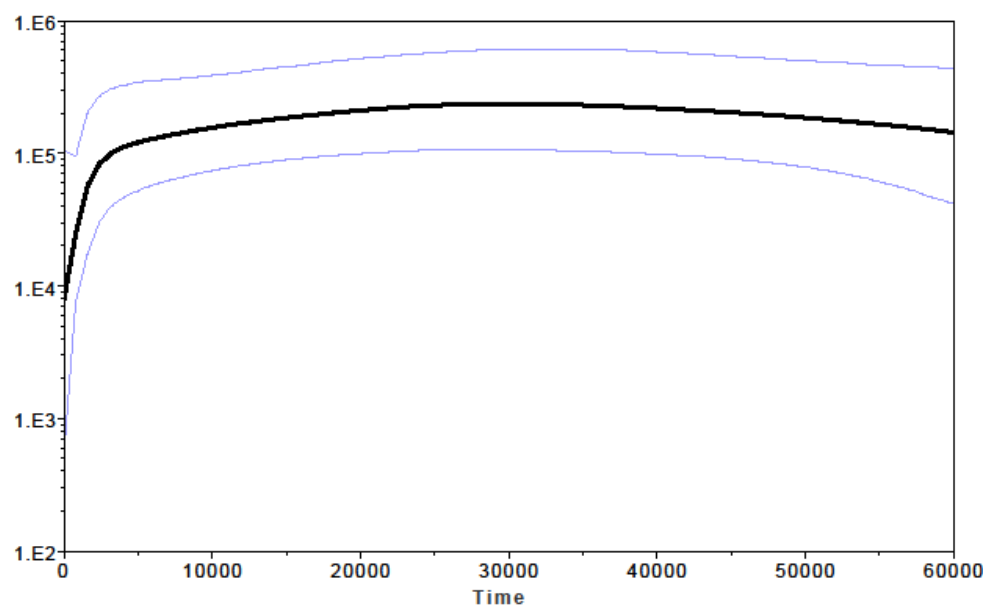

Lawa3 (LW3)

**Fig. S6** Bayesian skyline plots show the effective population size change over time in each studied population. Details concerning the settings are provided in the Methods.

# Test1 (Northern Thai people)

1,000 best simulations

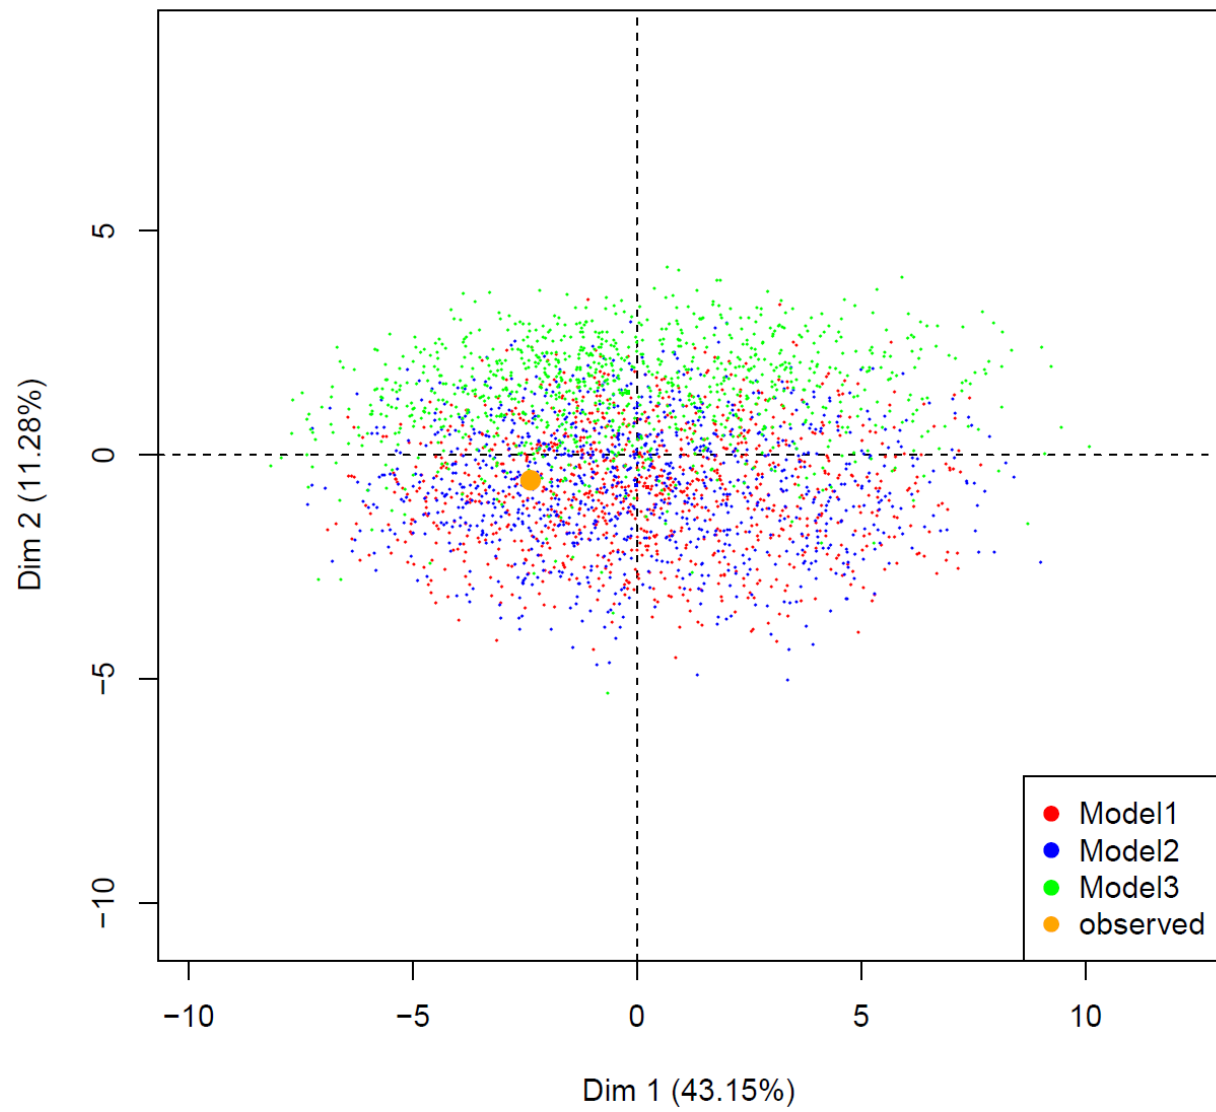

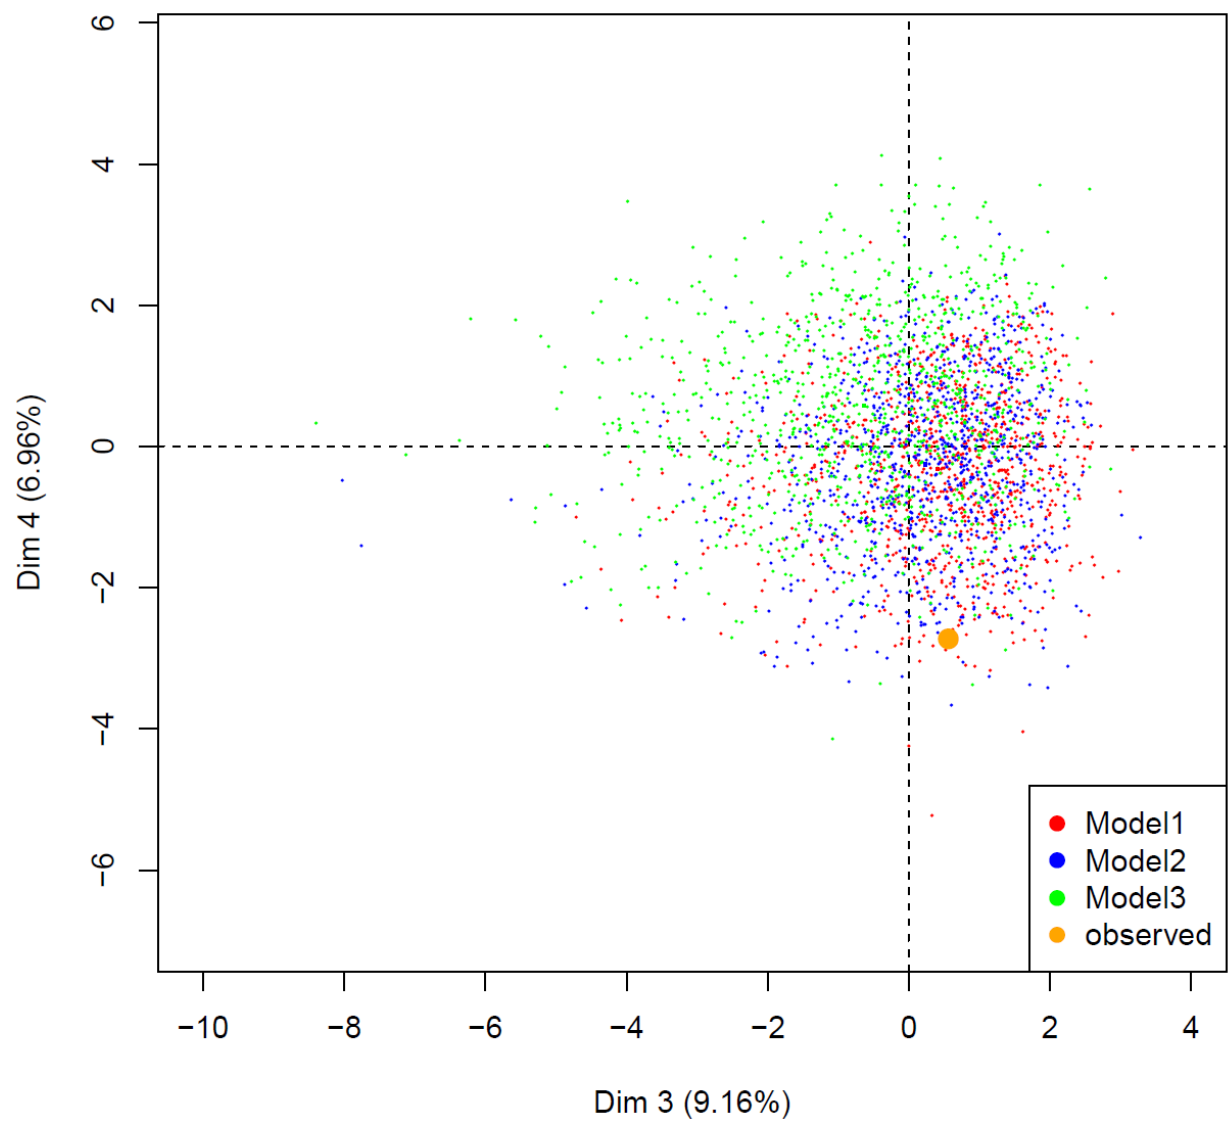

5,000 best simulations

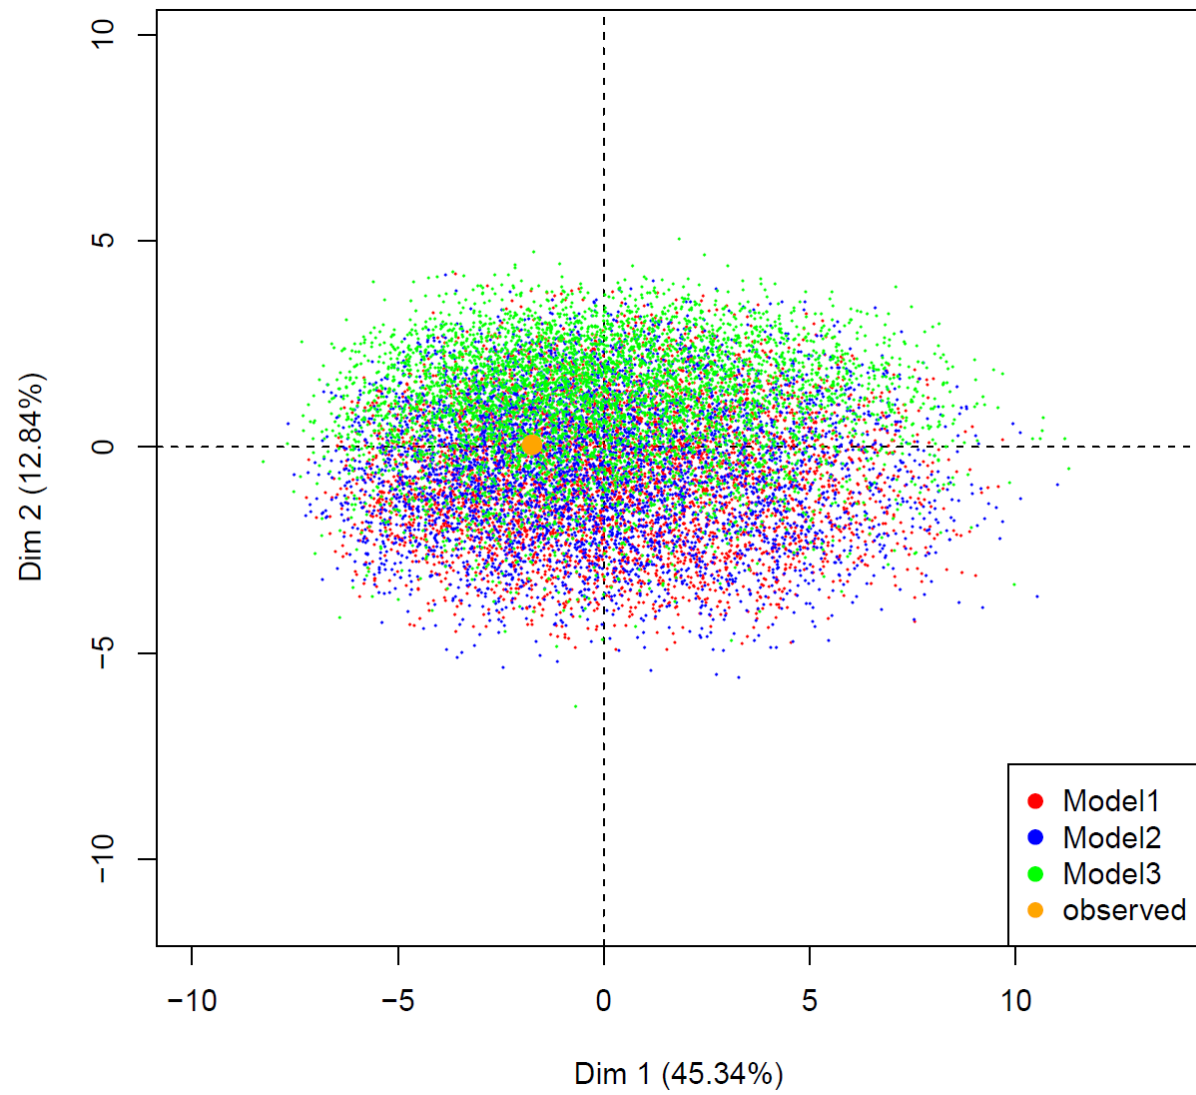

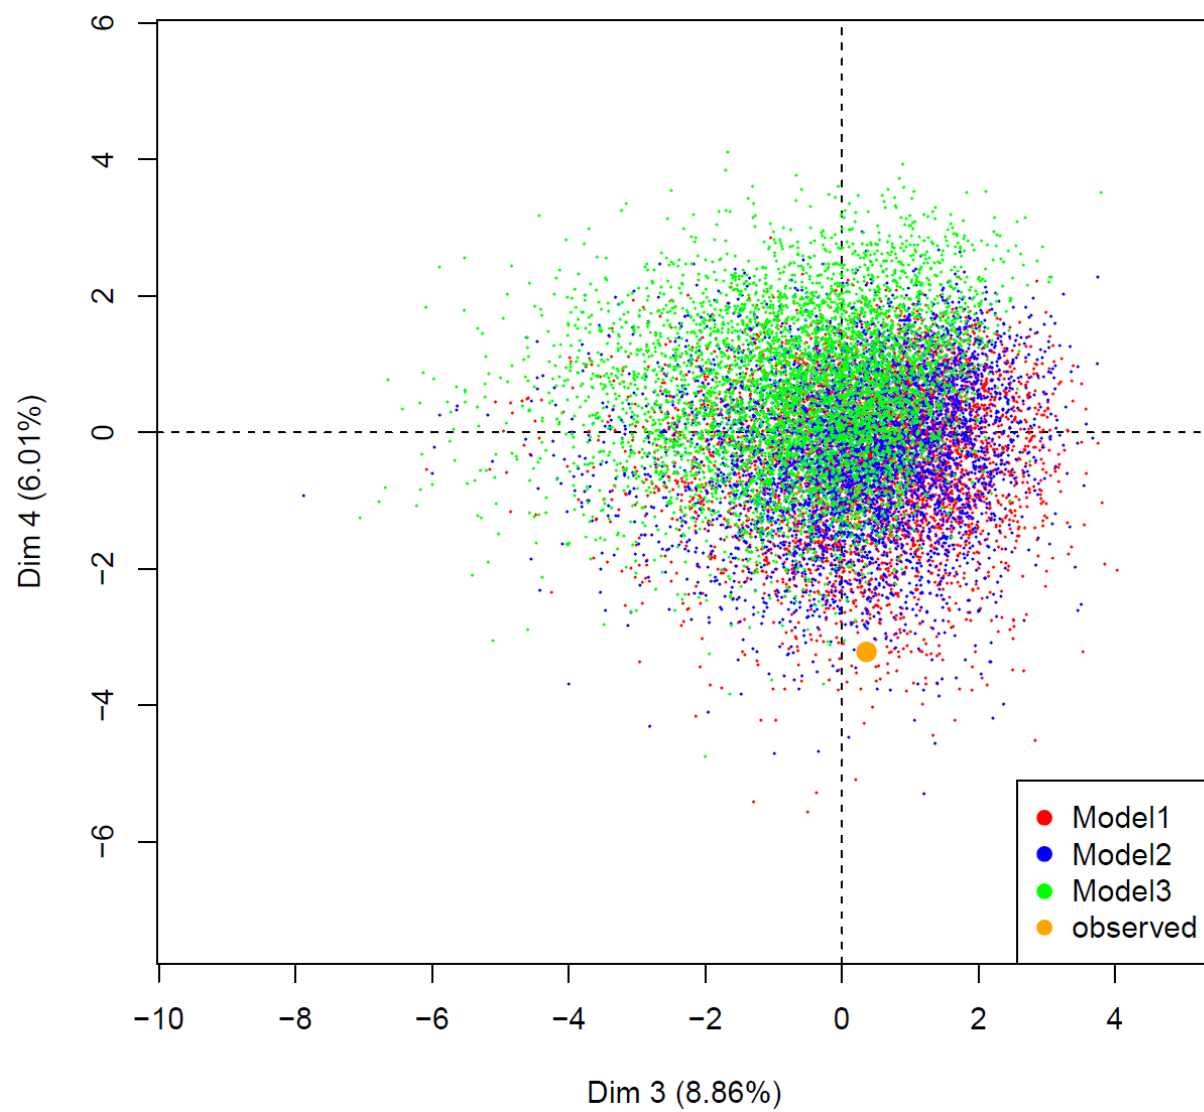

## Test 2 (Northeastern Thai and Lao people)

1,000 best simulations

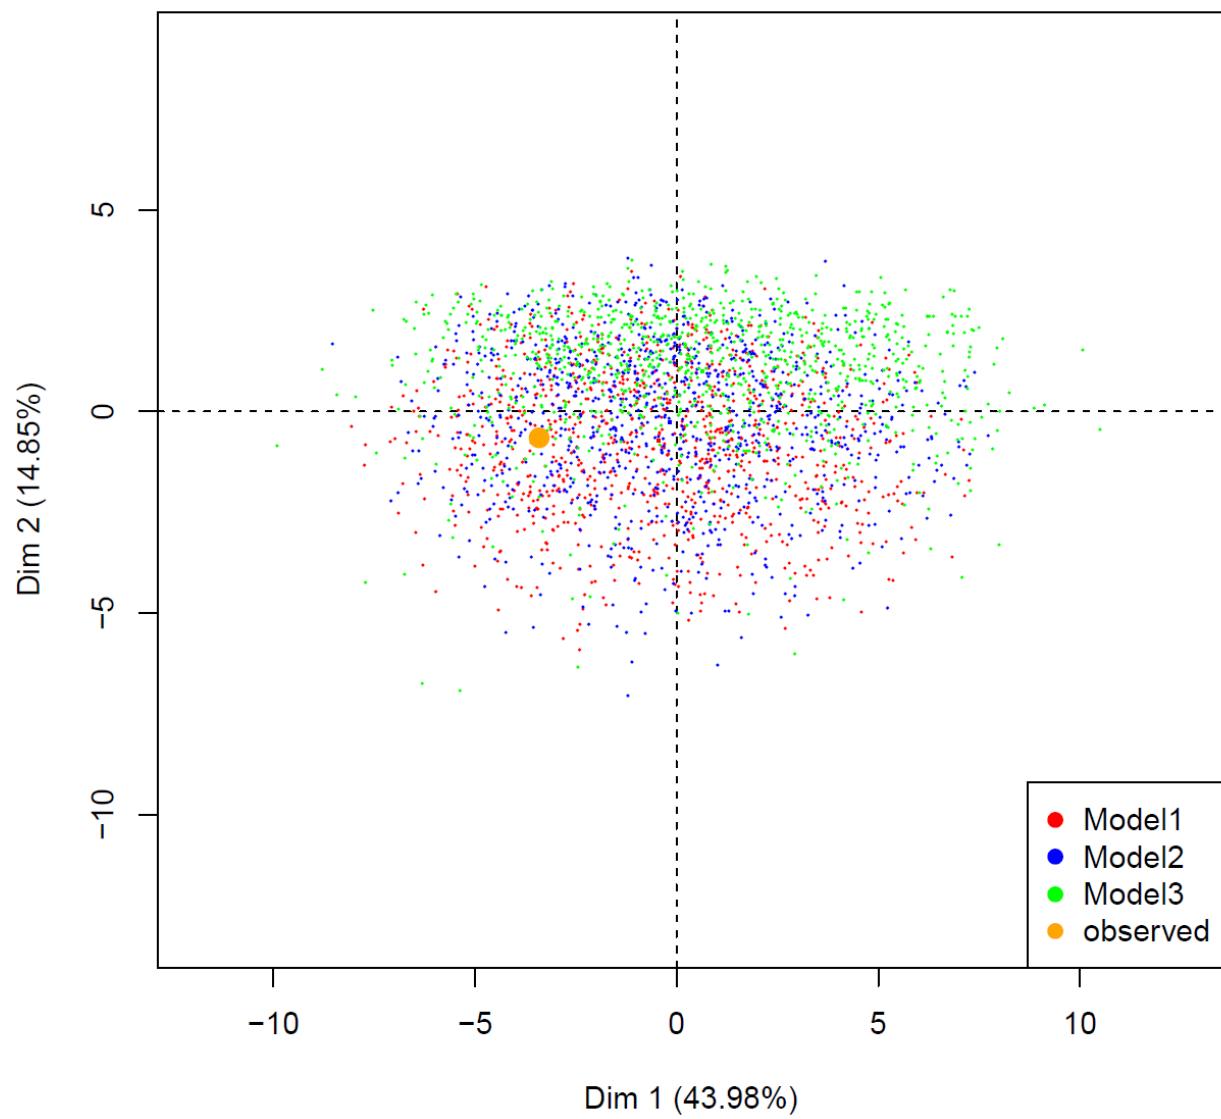

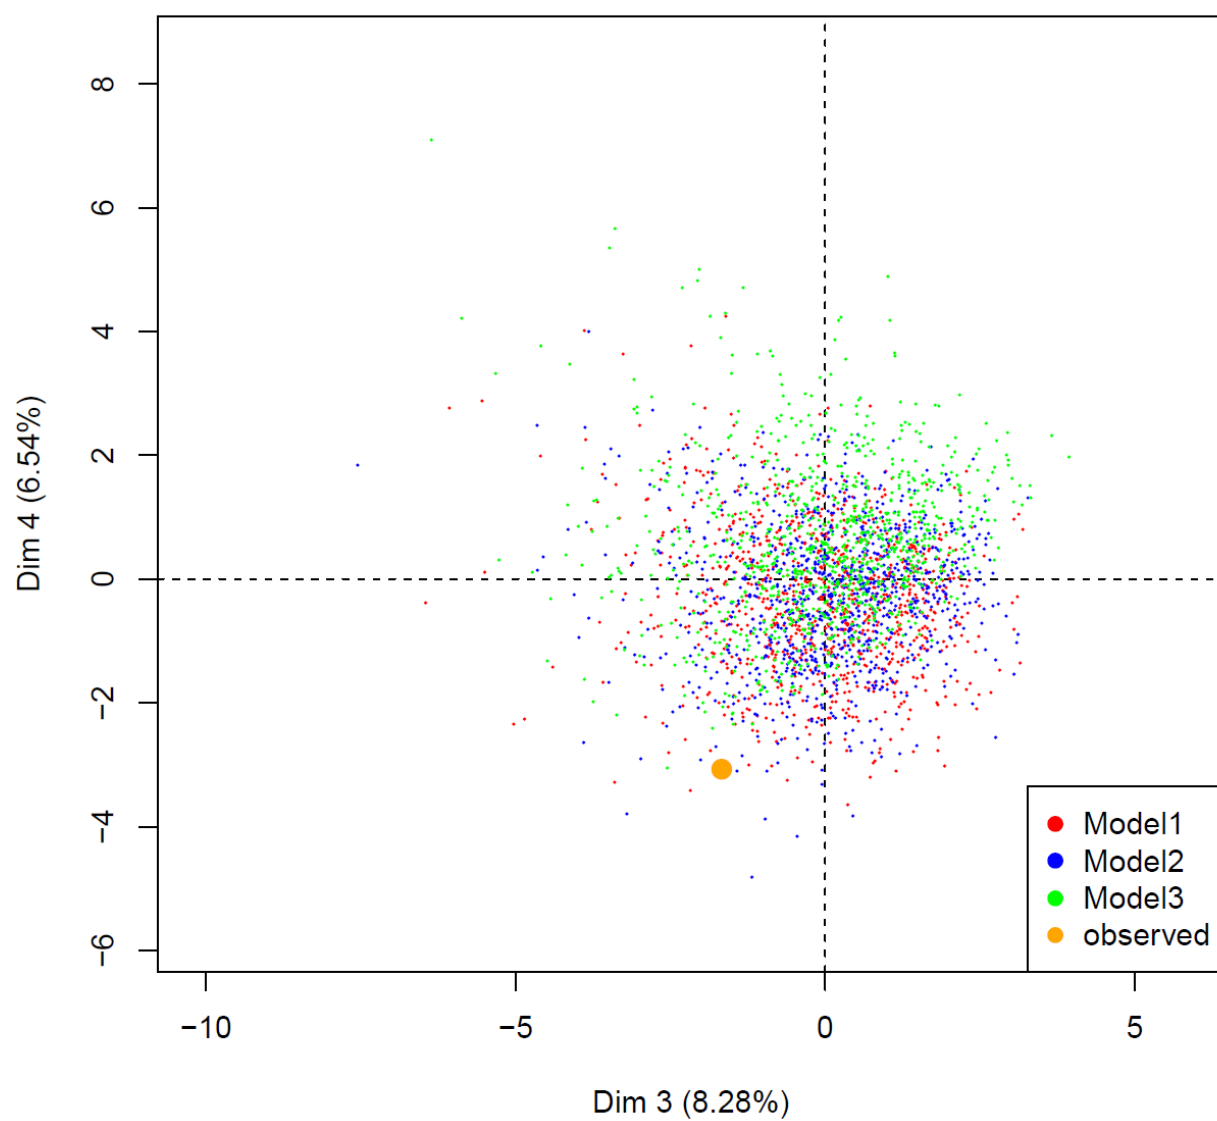

5,000 best simulations

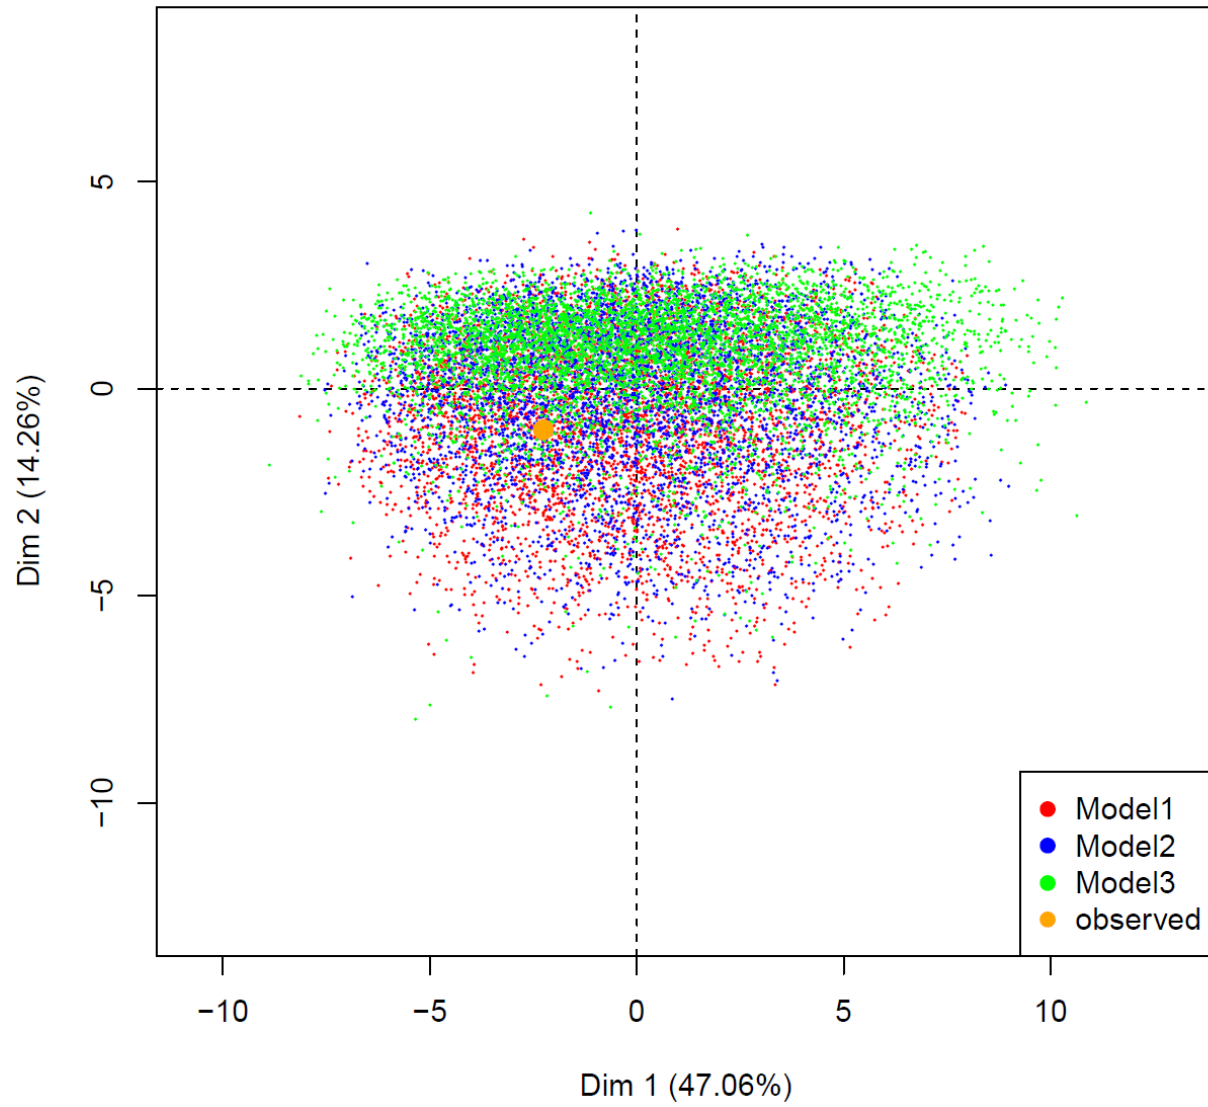

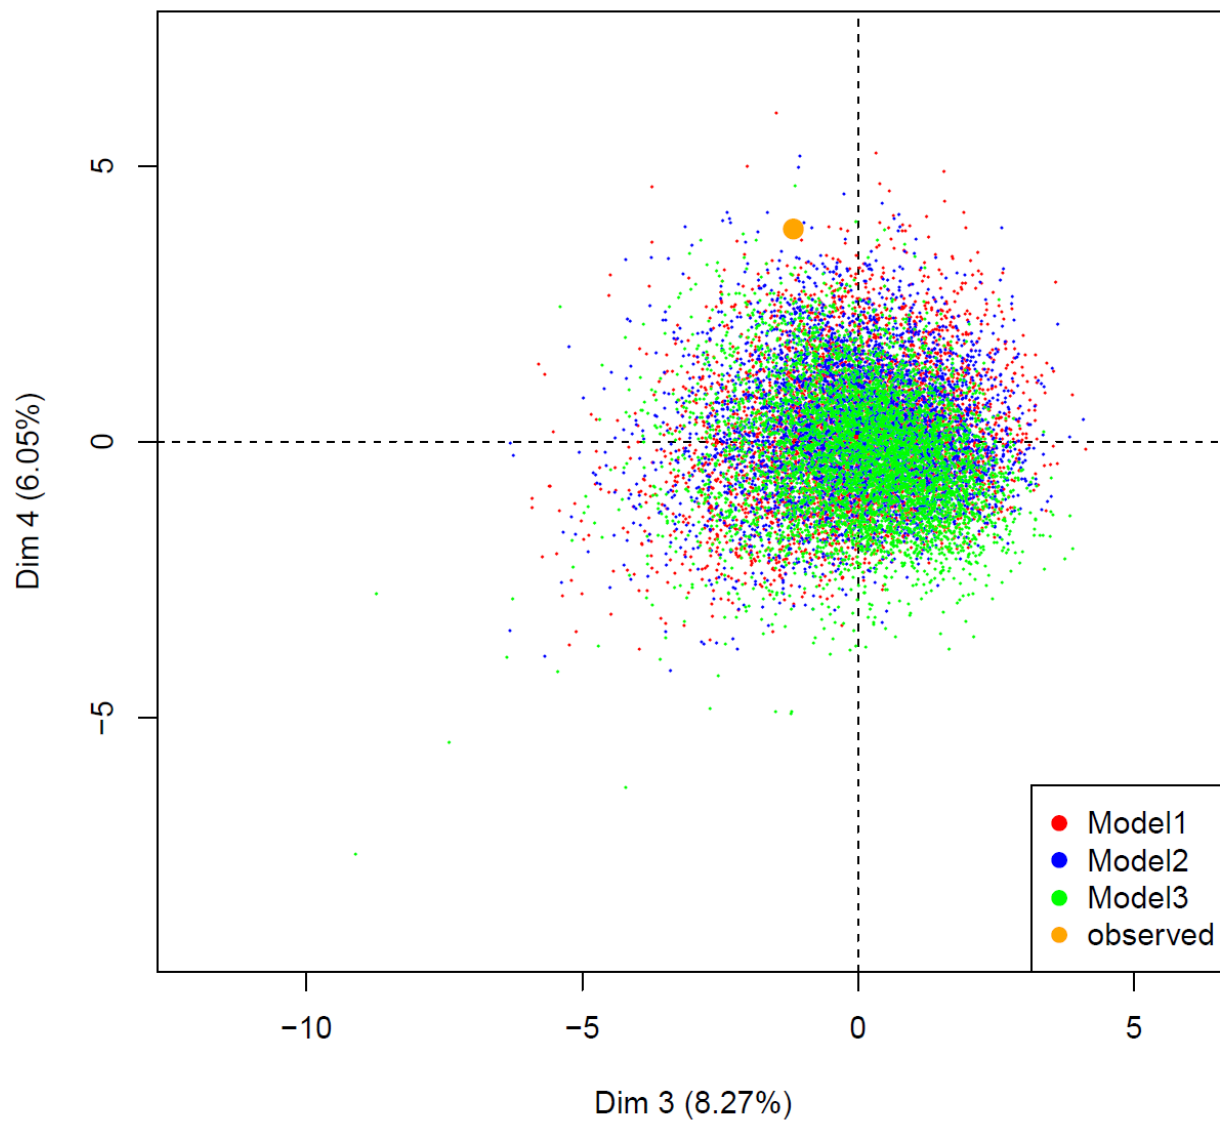

### Test 3 (Northeastern Thai people)

1,000 best simulations

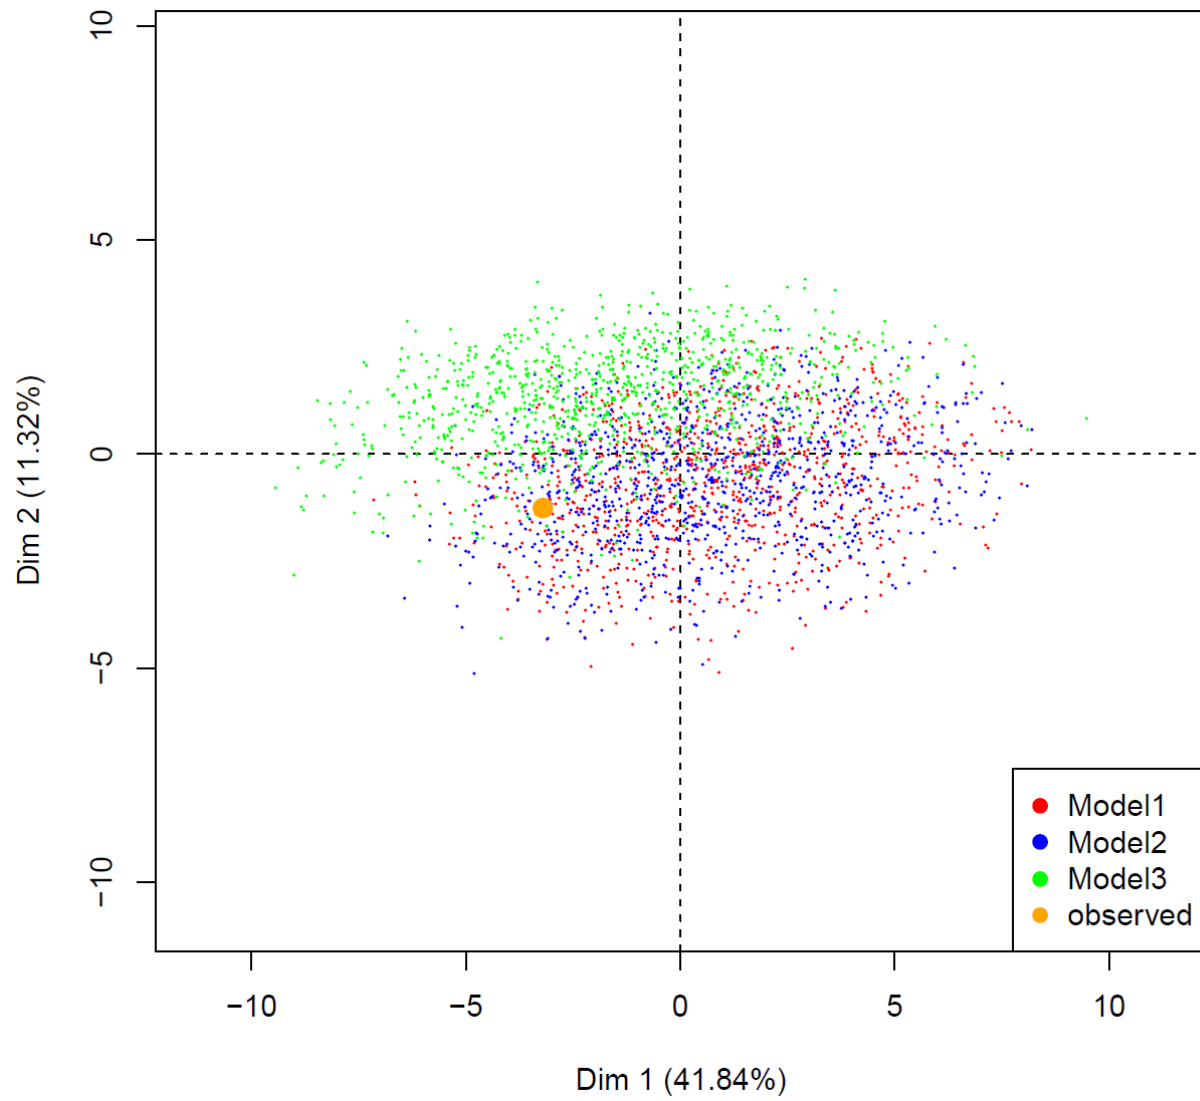

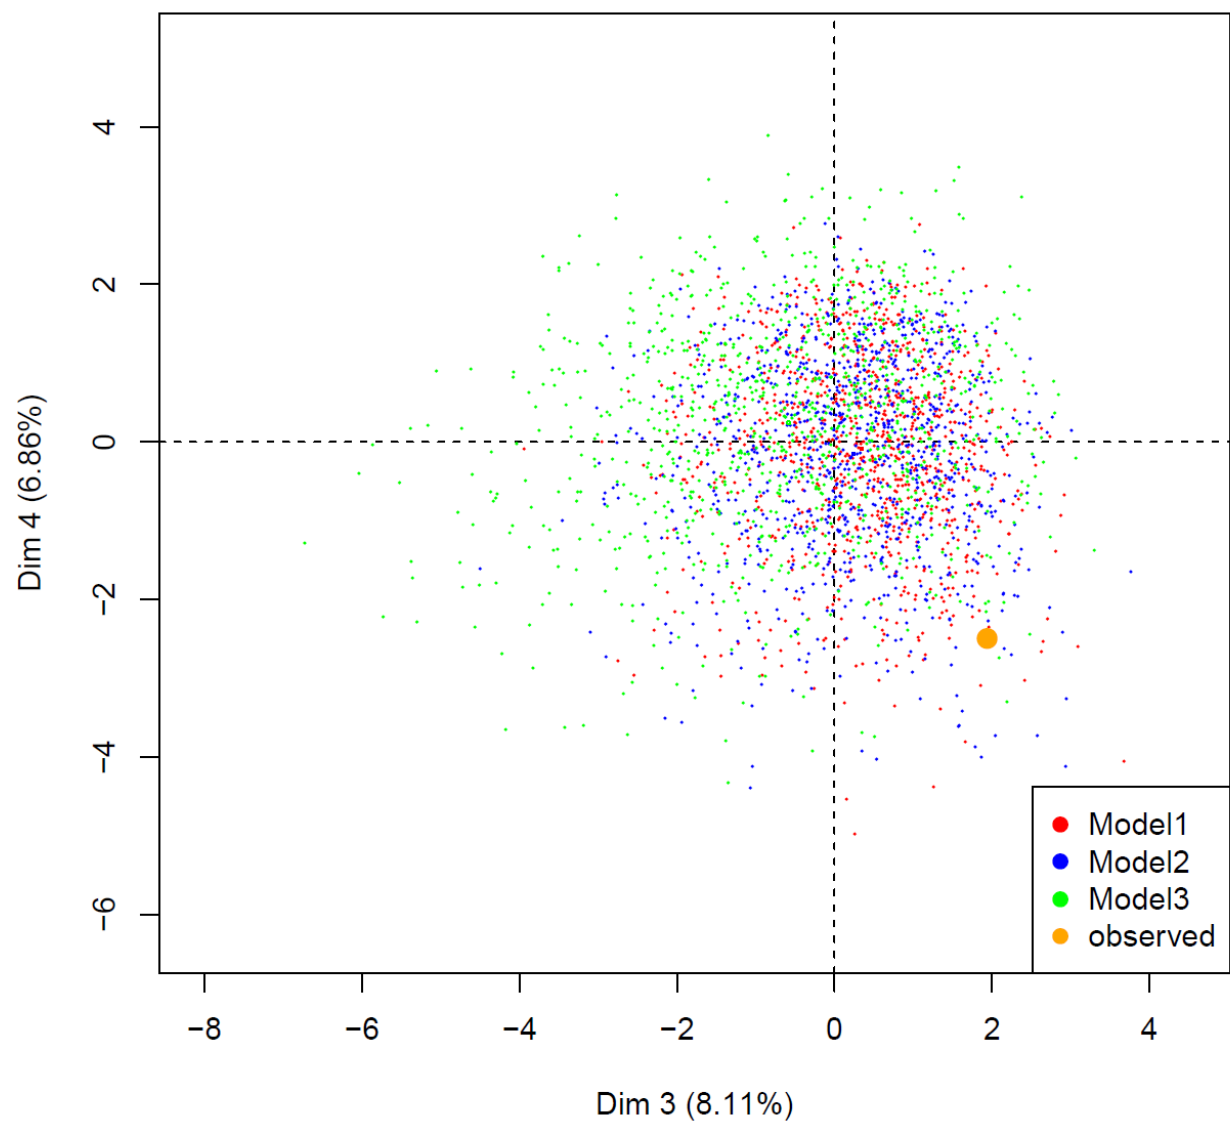

5,000 best simulations

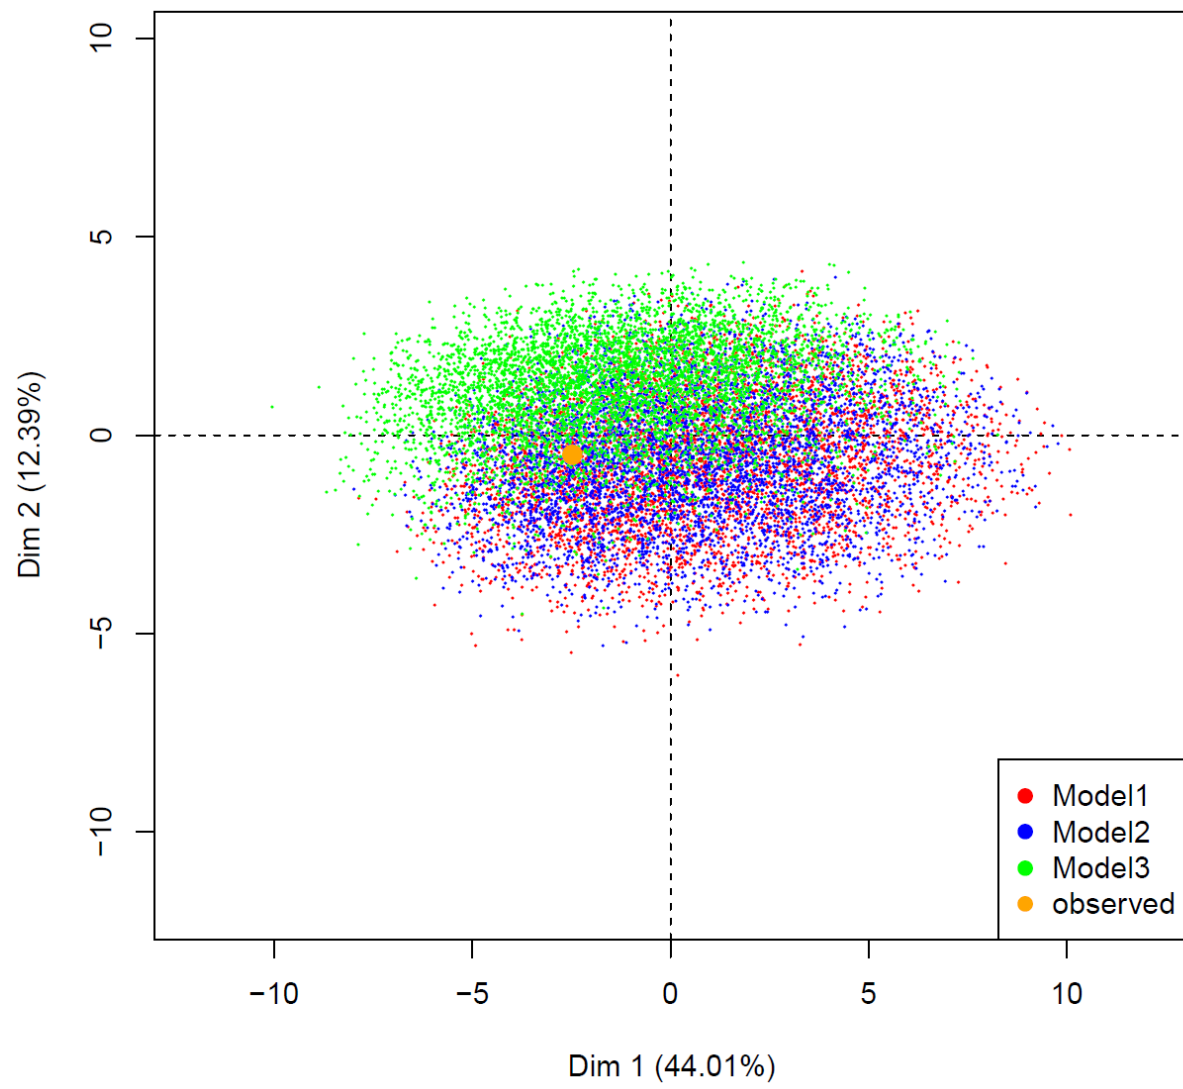

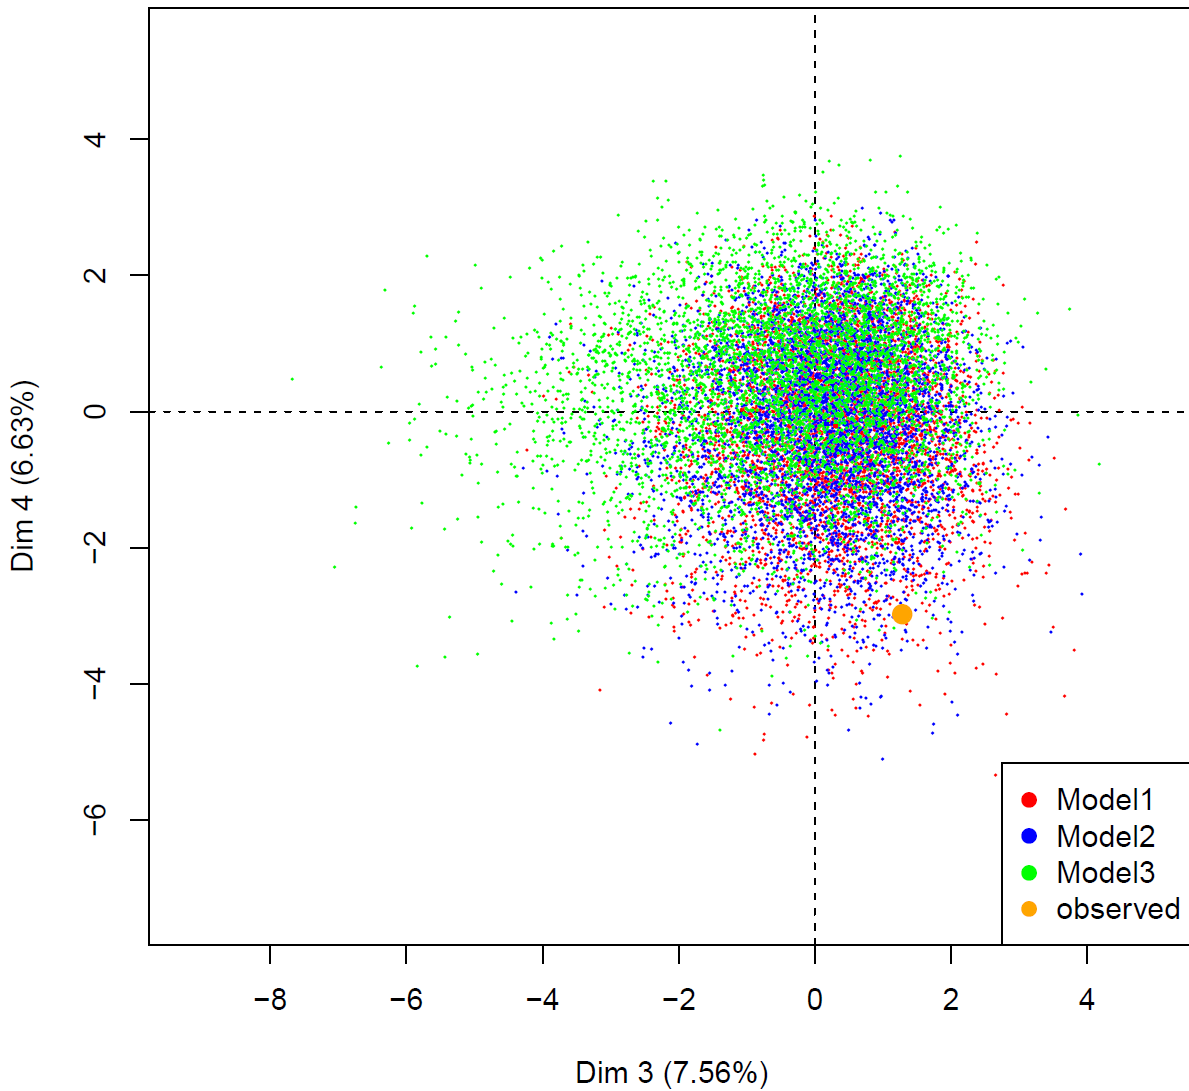

**Fig. S7** Principal Component Analysis (PCA) plots reveal the fit between the simulated and observed data generated by the best 1,000 (or 5,000) simulations for each model. Model 1, Model 2, and Model 3 correspond to models of demic diffusion, admixture and cultural diffusion, respectively.
